# Supplementary material for: Sequential phosphorylation of NDEL1 by the DYRK2-GSK3β complex is critical for neuronal morphogenesis
Source: eLife. 2019 Dec 9;8:e50850. doi: 10.7554/eLife.50850 (PMC6927744; doi:10.7554/eLife.50850)
Supplement: Figure 1—source data 1. [file elife-50850-fig1-data1.xlsx]

## Sheet: Fig 1E pNDEL1 in dev brains
	Figure 1E. Quantitation of endogenous pNDEL1 in developing mouse brain lysates
		E15	E18	P7	P14	P28	Adult
	Number of values	7	6	7	7	7	7
		intensity	intensity	intensity	intensity	intensity	intensity
	Mean	1	1.622	1.674	0.5556	0.5498	0.3022
	Std. Deviation	0	0.8856	0.9007	0.3203	0.2721	0.2705
	Std. Error	0	0.3615	0.3404	0.1211	0.1028	0.1022
	Lower 95% CI	1	0.6927	0.8405	0.2594	0.2982	0.05207
	Upper 95% CI	1	2.551	2.507	0.8518	0.8015	0.5524
		1	1.13206	2.05286	0.656057	0.818885	0.790533
		1	0.852068	1.12559	0.341004	0.530253	0.17284
		1		3.45071	1.16851	0.947838	0.539226
		1	1.07217	0.789658	0.612932	0.547792	0.220127
		1	3.09163	1.5717	0.545602	0.455073	0.084178
		1	1.25904	1.73639	0.157863	0.112509	0.032701
		1	2.32526	0.988142	0.406991	0.436433	0.275998
