# Supplementary material for: Sequential phosphorylation of NDEL1 by the DYRK2-GSK3β complex is critical for neuronal morphogenesis
Source: eLife. 2019 Dec 9;8:e50850. doi: 10.7554/eLife.50850 (PMC6927744; doi:10.7554/eLife.50850)
Supplement: Figure 1—source data 2. [file elife-50850-fig1-data2.xlsx]

## Sheet: Fig 1F pNDEL1 by kinases OE
	Figure 1F. Quantitatative analysis of endogenous pNDEL1 blot with DYRK2-GSK3β kinases over-expression
		Control		DYRK2-GSK3β over-expression
	Number of values	4		4
		intensity		intensity
	Mean	1		7.952
	Std. Deviation	0		3.387
	Std. Error	0		1.694
	Lower 95% CI	1		2.562
	Upper 95% CI	1		13.34
		1		9.3885
		1		12.0193
		1		4.62681
		1		5.77155
