# Supplementary material for: Sequential phosphorylation of NDEL1 by the DYRK2-GSK3β complex is critical for neuronal morphogenesis
Source: eLife. 2019 Dec 9;8:e50850. doi: 10.7554/eLife.50850 (PMC6927744; doi:10.7554/eLife.50850)
Supplement: Figure 2—source data 1. [file elife-50850-fig2-data1.xlsx]

## Sheet: Fig 2A-C axon-dendrite assay
	Figure 2A-C. Axon/dendrite outgrowth analysis for NDEL1 knockdown and rescue groups
		Scrambled shRNA					NDEL1 shRNA					NDEL1 shRNA + NDEL1 WT resi					NDEL1 shRNA + NDEL1 332/336A resi
	Number of values	405					382					327					159
		total length	the longest neurite length	axonal length	dendritic length		total length	the longest neurite length	axonal length	dendritic length		total length	the longest neurite length	axonal length	dendritic length		total length	the longest neurite length	axonal length	dendritic length
	Mean	1149	438.8	796.5	352.3		792.9	293.4	485.2	307.7		1263	394	800.8	462.7		873.8	320.5	585.3	288.4
	Std. Deviation	622.3	239.6	534.2	248.5		372.8	149.1	297	199.6		570.3	175.1	470.5	275.3		373.8	140.1	301.1	198.3
	Std. Error	30.92	11.9	26.54	12.35		19.07	7.627	15.2	10.21		31.54	9.686	26.02	15.22		29.64	11.11	23.88	15.72
	Lower 95% CI	1088	415.4	744.3	328.1		755.4	278.4	455.3	287.6		1201	375	749.6	432.8		815.2	298.6	538.2	257.4
	Upper 95% CI	1210	462.2	848.6	376.6		830.4	308.4	515.1	327.8		1326	413.1	852	492.7		932.3	342.5	632.5	319.5
		370.99	326.492	326.492	44.498		538.79	355.918	505.381	33.409		389.055	224.199	224.199	164.856		372.877	195.613	195.613	177.264
		201.338	157.567	201.338	0		353.581	353.581	353.581	0		524.822	162.565	162.565	362.257		596.896	333.72	426.895	170.001
		642.993	428.132	538.824	104.169		560.137	560.137	560.137	0		335.653	183.819	335.653	0		476.6	347.304	436.234	40.3663
		728.631	430.837	515.036	213.595		306.976	98.9767	170.692	136.284		698.088	477.904	621.534	76.554		990.192	605.767	990.192	0
		862.981	326.23	688.99	173.992		593.231	313.211	549.571	43.6603		720.231	400.11	521.31	198.921		457.458	174.808	174.808	282.651
		617.32	526.614	584.605	32.7143		593.289	293.427	446.225	147.064		582.779	359.99	444.367	138.413		362.874	264.123	318.08	44.794
		1167.09	548.368	876.726	290.366		792.538	301.546	343.913	448.625		1432.35	732.431	1348.71	83.636		650.789	514.242	614.23	36.559
		752.426	401.36	486.4	266.026		623.089	450.646	623.089	0		882.112	371.892	673.284	208.828		863.959	422.099	572.692	291.267
		595.071	448.155	537.22	57.8503		250.107	250.107	250.107	0		491.752	213.094	266.646	225.106		637.504	422.706	462.473	175.031
		721.709	561.395	677.336	44.373		449.793	315.762	388.549	61.2433		365.691	249.27	249.27	116.421		903.35	359.682	699.827	203.523
		889.874	537.279	752.073	137.801		463.043	327.422	424.133	38.9097		922.137	775.518	882.106	40.031		774.54	558.329	735.554	38.986
		722.499	342.739	469.511	252.987		635.147	393.914	635.147	0		1599.47	289.153	457.67	1141.8		281.839	241.221	281.839	0
		350.056	217.429	272.158	77.8983		347.8	213.326	261.452	86.3473		689.363	242.56	456.928	232.435		449.481	260.481	362.724	86.7567
		181.605	132.562	132.562	49.0423		387.929	312.47	387.929	0		680.974	356.699	356.699	324.275		342.923	116.334	116.334	226.589
		1387.99	402.863	503.198	884.789		598.364	439.132	439.132	159.232		558.301	336.733	445.731	112.57		1072.93	388.433	515.591	557.335
		1045.49	842.202	972.155	73.337		642.087	287.897	529.363	112.724		719.564	517.715	573.329	146.235		332.178	277.08	332.178	0
		375.211	141.106	141.106	234.104		396.214	184.439	184.439	211.775		465.517	332.407	378.988	86.529		569.436	351.798	395.969	173.467
		368.773	307.157	368.773	0		430.778	252.992	395.681	35.0973		736.695	271.638	271.638	465.057		499.406	203.06	385.463	113.943
		551.069	250.211	479.836	71.233		861.034	357.972	511.681	349.353		452.496	390.235	452.496	0		656.636	529.84	656.636	0
		592.876	454.856	545.827	47.0497		667.683	280.473	377.967	289.716		707.736	283.24	495.191	212.545		941.764	555.148	724.891	216.873
		172.876	172.876	172.876	0		582.457	197.586	233.804	348.653		501.815	159.075	221.692	280.123		757.241	497.64	619.809	137.432
		1223.3	618.68	944.446	278.849		426.235	248.249	341.144	85.0913		1091.63	245.826	674.83	416.799		744.551	405.154	570.975	173.577
		619.894	259.707	378.919	240.975		910.235	464.965	876.664	33.5713		894.939	318.008	707.95	186.989		479.845	257.669	338.999	140.847
		673.515	454.52	553.374	120.142		144.742	95.3673	95.3673	49.3743		558.319	259.668	308.45	249.869		572.409	237.842	322.174	250.235
		685.72	629.101	629.101	56.619		555.346	317.629	477.344	78.0017		1626.07	441.689	742.434	883.635		661.38	200.982	402.561	258.819
		982.93	457.907	562.678	420.253		365.907	231.601	275.102	90.8047		741.79	310.405	523.689	218.101		657.309	381.77	548.449	108.86
		978.361	592.624	771.228	207.134		812.57	402.193	402.193	410.377		1173.74	285.415	895.955	277.781		754.858	248.283	263.28	491.578
		589.212	419.575	513.443	75.769		390.189	165.443	165.443	224.747		827.748	293.017	650.125	177.623		483.072	142.909	317.957	165.115
		665.853	617.226	665.853	0		325.003	221.638	325.003	0		2044.25	500.769	1928.14	116.111		819.544	367	428.226	391.317
		590.544	312.155	312.155	278.389		787.139	392.858	468.797	318.342		788.961	383.634	579.861	209.1		400.091	125.933	218.187	181.904
		691.109	411.036	501.133	189.976		405.622	231.83	231.83	173.792		2922.76	471.622	1242.41	1680.34		622.926	185.302	523.474	99.4523
		1458.47	891.777	1254.7	203.772		503.611	252.579	292.251	211.359		756.316	259.969	431.773	324.543		362.522	305.372	320.259	42.2623
		493.659	493.659	493.659	0		379.958	379.958	379.958	0		1610.4	654.789	1303.59	306.811		887.731	216.545	370.351	517.38
		921.819	352.08	524.667	397.153		691.42	379.342	549.708	141.712		1590.12	307.539	1395.54	194.576		809.914	259.039	687.039	122.875
		1175.04	797.704	1048.08	126.959		1095.34	792.434	1013.54	81.7973		2463.23	618.362	1696.07	767.155		330.702	184.51	280.982	49.72
		642.318	240.699	402.241	240.077		1208.59	333.486	506.091	702.495		1519.92	415.65	1083.86	436.064		927.849	259.512	790.974	136.875
		501.177	248.663	386.843	114.334		471.233	111.868	151.167	320.066		2095.34	651.378	1616.1	479.241		745.419	248.54	426.908	318.512
		431.765	172.92	228.763	203.002		532.916	193.911	291.294	241.622		1586.63	285.153	844.89	741.738		577.049	226.626	407.914	169.135
		511.665	128.692	128.692	382.973		1239.2	259.62	547.53	691.67		2578.35	591.294	2198.95	379.393		646.439	200.241	366.446	279.992
		389.078	166.05	305.109	83.9697		878.41	430.215	571.286	307.124		1336.17	598.558	1116.55	219.621		487.888	292.491	408.205	79.683
		1039.53	243.205	492.139	547.393		548.427	259.941	317.131	231.296		1919.26	567.514	1515.42	403.838		446.713	183.033	330.902	115.811
		763.371	318.947	610.83	152.541		343.447	157.679	227.453	115.994		2113.11	467.023	1602.63	510.478		1192.94	510.429	804.042	388.901
		527.677	244.441	454.077	73.5993		587.561	257.182	487.359	100.202		956.689	225.643	628.983	327.706		458.006	219.533	395.323	62.6833
		1097.41	634.871	819.594	277.82		820.382	321.727	472.762	347.621		770.71	242.396	242.396	528.314		1300.85	427.406	746.744	554.102
		823.08	454.728	518.459	304.622		1848.26	457.011	1387.82	460.438		2293.97	534.267	1594.96	699.017		1078.89	355.967	820.229	258.66
		1394.95	490.787	1122.55	272.4		783.945	221.048	490.035	293.91		997.707	456.732	657.154	340.554		896.454	254.593	437.015	459.439
		829.625	180.262	235.837	593.788		511.748	89.617	167.02	344.728		1675.29	395.04	1565.16	110.13		379.564	75.3163	194.364	185.201
		1241.56	384.502	643.863	597.697		2019.1	877.339	1804.41	214.693		2434.85	630.353	1987.54	447.31		1445.18	568.855	1037.8	407.38
		1286.44	369.676	567.854	718.587		605.103	291.317	456.235	148.868		1550.14	389.705	1146.07	404.067		1941.23	610.56	1122.85	818.385
		622.733	372.524	427.727	195.006		201.074	72.9327	72.9327	128.141		3525.12	913.241	3039.85	485.267		458.605	337.137	401.411	57.1943
		460.44	230.697	321.045	139.396		170.104	66.361	48.17	121.934		1016.81	302.602	655.476	361.331		253.436	77.0457	94.724	158.712
		405.427	156.933	199.973	205.454		323.746	130.944	130.944	192.802		2296.84	681.062	1775.3	521.535		1110.8	252.774	586.408	524.392
		673.976	266.515	369.439	304.536		1527.93	491.376	1224.08	303.85		814.99	288.08	354.647	460.343		1132.49	219.442	681.277	451.211
		481.989	173.259	227.734	254.255		604.083	149.019	229.169	374.914		723.529	308.31	510.649	212.879		707.529	208.365	454.047	253.482
		1616.89	544.256	741.559	875.334		310.65	125.8	232.975	77.6747		1820.17	519.572	1021.84	798.33		701.84	346.321	593.951	107.889
		962.654	289.65	560.388	402.266		987.864	265.831	859.286	128.579		914.099	197.881	336.825	577.274		868.771	478.017	575.104	293.666
		634.993	201.304	392.85	242.142		423.528	113.417	219.368	204.16		743.188	307.768	480.617	262.571		805.257	312.047	508.297	296.96
		1328.52	390.399	746.732	581.789		486.599	204.904	282.059	204.54		993.592	251.136	353.282	640.31		1189.54	552.896	640.375	549.164
		477.081	150.321	299.216	177.865		825.751	109.201	290.363	535.388		1616.12	242.091	1112.28	503.843		884.87	442.797	810.103	74.7667
		461.185	197.475	298.846	162.34		570.772	270.82	391.125	179.647		1449.89	179.338	401.988	1047.91		1174.78	372.223	799.917	374.862
		408.333	188.41	285.51	122.823		582.427	183.903	183.903	398.524		1365.05	253.373	1015.4	349.656		543.318	116.502	274.951	268.367
		773.676	423.896	542.177	231.498		934.042	389.753	717.634	216.408		1385.15	290.711	1079.32	305.822		372.65	166.411	224.487	148.163
		1313.21	528.363	1085.71	227.496		802.809	254.117	509.312	293.497		2015.63	461.33	1137.68	877.952		1365.87	547.626	1039.48	326.386
		1167.25	478.029	704.855	462.399		1470.72	568.1	1282.03	188.694		2003.26	639.031	1891.69	111.576		675.325	269.514	369.998	305.327
		800.005	236.528	356.732	443.273		645.679	333.358	433.327	212.352		1085.46	276.384	616.061	469.398		1567.48	361.533	1212.02	355.455
		1075.18	329.079	769.173	306.008		286.779	169.269	169.269	117.509		1028.32	427.799	660.729	367.589		387.022	129.128	204.435	182.587
		906.794	247.093	487.157	419.637		532.275	203.249	253.036	279.239		556.33	251.071	499.408	56.922		870.772	264.311	746.812	123.96
		508.523	147.185	147.185	361.338		1575.46	277.708	1138.3	437.165		811.914	271.345	438.69	373.224		1416.64	446.167	621.883	794.753
		467.591	266.877	363.155	104.436		565.565	157.398	277.852	287.713		2192.21	449.663	1766.08	426.135		1051.45	292.457	438.024	613.426
		1152.09	293.342	608.903	543.183		858.116	302.915	524.653	333.464		647.885	137.846	204.538	443.347		244.199	107.419	107.419	136.781
		401.229	300.387	300.387	100.842		1355.68	549.164	946.639	409.045		1371.49	594.671	1128.4	243.085		663.373	192.235	417.172	246.2
		1290.59	751.444	1006.65	283.942		1249.38	323.202	892.588	356.791		1201.9	249.149	872.635	329.267		625.534	482.935	604.751	20.7827
		610.048	277.695	437.555	172.493		484.398	149.36	274.852	209.546		1529.3	419.97	874.627	654.677		540.25	319.95	355.35	184.9
		1145.83	324.863	840.708	305.12		737.359	163.189	342.386	394.973		718.344	174.809	394.256	324.089		593.261	323.462	453.016	140.245
		550.242	122.693	122.693	427.549		205.887	125.145	163.512	42.3753		1419.26	357.39	628.424	790.838		363.666	94.6783	134.866	228.8
		624.097	205.423	331.386	292.711		308.242	205.902	285.175	23.0677		2327.11	572.223	2050.79	276.317		938.259	308.824	795.29	142.969
		512.184	149.16	182.22	329.963		561.624	197.458	234.37	327.254		2605.54	810.78	2211.94	393.598		347.55	183.4	347.55	0
		1475.38	365.879	536.519	938.858		691.641	528.703	528.703	162.938		1265.9	438.006	926.968	338.934		1198.31	466.295	969.974	228.332
		550.147	275.202	275.202	274.945		867.166	330.886	596.17	270.996		473.381	260.036	278.303	195.078		736.984	327.417	607.417	129.567
		610.739	178.925	210.442	400.297		700.291	304.687	617.681	82.61		958.711	472.996	813.092	145.619		651.842	246.109	373.943	277.899
		624.347	267.183	496.882	127.464		397.166	155.72	155.72	241.447		1250.91	441.273	492.162	758.745		532.018	314.344	460.183	71.8357
		821.824	545.304	793.328	28.4963		736.682	309.387	532.673	204.009		2128.31	317.227	1127.87	1000.44		1123.2	436.28	530.478	592.725
		1147.09	614.953	979.049	168.04		1730.44	598.427	1334.6	395.845		2436.09	379.793	1283.25	1152.85		799.884	294.851	780.24	19.6443
		889.796	283.093	716.344	173.452		271.537	118.069	159.123	112.413		1884.94	575.673	1121.81	763.128		971.342	482.555	682.181	289.162
		689.325	243.634	502.252	187.073		660.533	193.716	370.888	289.645		1542.97	355.121	862.255	680.72		1063.23	310.959	819.567	243.66
		1147.85	508.955	933.908	213.941		320.014	136.264	161.571	158.443		3228.42	702.792	2077.72	1150.7		999.876	410.086	540.056	459.82
		1238.82	634.001	1036.43	202.394		406.553	299.609	320.173	86.38		715.98	245.008	425.238	290.742		1087.57	338.819	994.483	93.0877
		635.814	429.042	596.486	39.328		670.789	264.675	378.384	292.404		2071.76	283.876	1024.07	1047.7		764.64	303.331	620.914	143.726
		871.255	454.902	480.242	391.014		984.249	405.761	740.986	243.263		1305.73	336.019	1035.58	270.151		767.801	225.047	516.828	250.973
		3142.95	538.573	2262.1	880.855		570.833	134.573	308.444	262.389		1706.76	301.278	1046.73	660.022		644.091	190.681	190.681	453.41
		443.801	159.561	227.659	216.142		332.293	138.963	218.441	113.852		1565.64	569.753	1037.79	527.852		840.067	263.74	377.976	462.09
		709.988	225.691	329.189	380.799		484.703	175.25	304.978	179.725		1288.62	507.829	797.368	491.247		313.769	114.615	165.97	147.799
		2870.23	1731.59	2751.99	118.235		1152.48	411.794	610.72	541.757		608.34	215.88	302.741	305.599		673.819	187.354	420.243	253.575
		2397.11	656.73	1891.94	505.174		586.545	214.863	261.9	324.645		1599.96	392.787	1107.29	492.668		525.146	128.517	145.961	379.185
		1159.35	643.504	1035.87	123.474		1250.12	493.326	493.326	756.792		851.713	446.14	563.774	287.94		861.118	206.19	351.785	509.332
		2136.1	712.318	1725.32	410.786		439.9	152.925	392.913	46.9873		727.326	227.483	227.483	499.843		1323.74	566.656	1175.56	148.188
		1258.19	422	694.077	564.11		305.006	133.752	222.812	82.1943		2236.77	604.344	1656.62	580.154		1639.63	414.627	1087.33	552.295
		1265.71	613.924	1098.85	166.858		826.199	416.587	698.77	127.429		1151.32	528.228	786.317	365.004		999.333	238.941	758.797	240.536
		2022.89	1142.05	1230.88	792.015		1041.96	286.876	372.461	669.499		1037.46	277.013	558.182	479.276		1135.85	205.144	703.121	432.731
		1357.06	521.415	1152.72	204.338		815.733	342.296	603.602	212.131		1384.02	307.228	640.6	743.42		1768.39	736.283	1437.64	330.755
		600.729	286.967	447.161	153.568		696.067	149.157	251.586	444.481		1362.34	329.231	867.974	494.361		1229.7	384.02	717.144	512.561
		427.684	133.531	250.15	177.534		570.112	171.859	218.48	351.632		1169.25	643.79	937.564	231.689		1869.77	410.248	1496.02	373.747
		1023.6	475.157	771.413	252.187		791.882	281.623	552.616	239.266		468.002	208.841	302.412	165.591		407.421	222.953	222.953	184.468
		1173.14	578.396	910.18	262.962		1090.21	430.38	551.681	538.533		571.135	229.26	405.384	165.751		843.497	498.618	746.932	96.565
		1559.43	585.298	1385.2	174.228		975.414	242.777	324.481	650.933		1498.75	505.693	857.042	641.711		742.638	392.775	556.473	186.165
		2216.47	953.356	1964.81	251.658		546.341	117.416	230.016	316.325		1611.96	364.962	720.524	891.437		1259.85	600.35	833.95	425.896
		348.157	212.115	251.592	96.5647		627.662	182.353	246.288	381.374		3324.2	694.836	2396.87	927.329		749.373	123.473	178.813	570.56
		801.165	359.235	376.357	424.808		1554.97	499.337	1146.14	408.834		2742.71	811.286	2310.99	431.725		946.591	267.275	495.093	451.498
		772.91	265.509	375.93	396.98		553.931	163.966	256.579	297.352		2274.8	568.17	1328.86	945.941		1301.04	572.066	1075.36	225.677
		420.521	154.029	154.029	266.492		1380.2	272.578	272.578	1107.62		1884.73	1197.37	1483.54	401.198		788.952	224.466	463.12	325.833
		510.076	201.803	246.983	263.093		990.044	309.688	533.268	456.776		622.241	233.841	247.86	374.382		658.628	280.792	535.819	122.809
		1745.89	555.403	1271.47	474.415		369	163.8	218.467	150.533		1642.51	323.265	935.114	707.393		416.461	247.293	310.734	105.727
		368.924	242.657	285.061	83.8633		460.43	176.038	196.925	263.505		1044.37	385.064	640.885	403.486		1104.95	231.771	299.529	805.422
		693.65	253.825	537.618	156.032		795.387	493.541	737.752	57.635		1693.13	395.884	621.352	1071.78		1354.41	497.408	1059.15	295.254
		1984.7	848.523	1704.1	280.608		1423.9	457.987	1035.96	387.935		1110.58	336.653	561.368	549.213		1351.55	378.331	999.477	352.073
		1741.81	744.93	1191.77	550.04		402.971	204.349	204.349	198.622		1910.03	416.142	618.254	1291.77		879.36	307.16	627.338	252.022
		1363.75	553.737	1223.49	140.261		816.363	380.347	625.624	190.739		1326.15	613.244	933.864	392.285		1406.08	468.192	1043.58	362.502
		1856.48	903.919	1345.81	510.667		679.013	242.527	242.527	436.486		1034.56	336.365	574.14	460.418		996.697	378.153	916.873	79.8247
		2756.77	642.589	984.61	1772.16		1138.17	446.835	889.768	248.404		1442.94	450.542	841.544	601.398		869.48	239.704	617.401	252.079
		2099.66	978.448	1854.46	245.199		1249.08	554.785	1034.54	214.549		697.619	242.705	437.582	260.038		1093.66	323.882	668.838	424.821
		568.064	283.809	341.384	226.68		451.882	235.432	330.577	121.305		468.376	236.054	346.502	121.874		729.43	273.933	553.886	175.544
		1404.34	634.215	1126.66	277.678		517.403	130.25	152.191	365.212		977.416	247.879	606.878	370.538		1407.16	335.288	1014.64	392.517
		573.745	230.647	297.143	276.601		908.174	265.92	673.281	234.893		1725.98	511.241	1069.01	656.972		940.912	239.327	388.477	552.435
		416.592	186.81	186.81	229.782		760.972	361.183	361.183	399.788		426.364	127.406	187.148	239.216		881.469	249.261	443.833	437.636
		1715.72	587.039	1631.19	84.5257		888.433	412.711	763.139	125.294		1375.66	551.459	768.256	607.401		1131.5	582.6	994.066	137.431
		1232.12	518.764	558.846	673.279		999.98	277.268	628.438	371.542		1225.56	457.505	457.505	768.054		822.878	355.458	706.044	116.833
		2990.65	379.153	1519.75	1470.9		369.012	180.861	297.672	71.3403		1204.36	686.571	808.923	395.44		1150.58	409.52	894.838	255.739
		2292.36	630.387	1919.2	373.16		756.754	232.758	548.569	208.185		799.815	261.126	349.029	450.786		962.849	220.716	619.181	343.668
		875.262	337.583	635.418	239.844		997.497	254.535	512.294	485.203		791.632	200.022	381.039	410.593		1663.65	333.966	936.247	727.406
		454.248	189.343	372.139	82.1083		545.119	201.677	201.677	343.442		1472.41	448.321	1191.49	280.914		695.715	236.15	575.168	120.547
		391.924	178.779	201.02	190.904		588.859	174.591	398.868	189.991		673.456	167.172	266.702	406.754		1082.04	409.604	769.396	312.643
		1662.73	757.112	1434.14	228.595		931.162	345.502	803.899	127.263		567.388	166.382	364.506	202.881		957.372	460.02	704	253.372
		723.828	223.931	261.149	462.679		503.667	246.252	448.18	55.4867		999.851	268.23	631.72	368.13		936.166	279.024	484.046	452.119
		1475.72	544.355	1265.52	210.198		698.293	305.653	424.852	273.441		692.932	242.388	449.267	243.665		848.965	365.195	574.769	274.197
		1282.13	638.47	1044.7	237.432		807.91	455.825	649.234	158.676		1000.37	229.514	355.349	645.023		1403.95	493.389	992.458	411.49
		995.685	352.322	776.305	219.38		1432.26	434.636	831.355	600.908		2812.35	526.071	1361.83	1450.52		663.767	169.751	455.539	208.228
		2012.13	895.383	1535.42	476.708		1160.27	371.323	503.578	656.693		1459.32	301.062	389.885	1069.43		935.567	212.109	368.442	567.125
		1603.91	809.122	1323.16	280.749		808.613	214.741	470.093	338.52		1142.71	267.664	556.215	586.493		1143.74	392.581	956.309	187.433
		605.871	303.211	508.359	97.5113		435.086	209.874	209.874	225.212		771.246	325.983	492.964	278.282		487.34	144.053	258.804	228.536
		2909.69	518.049	625.716	2283.97		660.227	263.919	484.119	176.108		1167.24	410.46	756.91	410.332		1477.27	431.245	914.58	562.692
		615.097	425.643	545.567	69.5307		649.657	133.284	324.924	324.733		1784.53	520.342	720.57	1063.96		957.436	186.426	384.184	573.252
		1092.55	341.044	646.375	446.171		587.332	176.451	235.244	352.089		1256.5	293.346	889.071	367.427		997.557	269.046	365.338	632.22
		1498.57	652.99	1094.94	403.626		645.75	222.282	396.489	249.261		1289.53	322.827	406.021	883.513		569.99	261.473	468.153	101.837
		1085.73	308.536	624.188	461.547		761.213	218.935	233.73	527.483		1488.84	287.074	691.779	797.06		2236.88	926.23	1892.17	344.706
		2130.14	834.64	1914.61	215.531		509.093	126.635	175.677	333.416		986.536	348.718	505.727	480.808		1050.64	229.015	372.34	678.304
		734.364	310.563	426.858	307.506		487.172	164.642	321.161	166.01		988.808	252.668	520.497	468.311		556.604	154.197	348.121	208.483
		1374.46	488.164	953.021	421.444		664.421	236.777	384.137	280.284		1177.03	417.379	810.904	366.128		1218.22	324.763	1011.11	207.107
		3251.19	901.883	2908.94	342.252		1115.86	286.073	403.116	712.742		1559.21	247.98	1185.24	373.968		1038.19	243.79	649.233	388.96
		2662.62	995.367	1982.74	679.882		792.625	156.702	380.045	412.58		1454.41	635.381	1156.87	297.548		1426.02	563.222	695.933	730.085
		2583.96	1697.28	2286.05	297.913		495.252	340.602	396.66	98.592		1542.69	432.536	910.258	632.432		1139.13	222.727	605.885	533.249
		467.119	147.555	307.83	159.289		760.298	198.051	382.861	377.437		1255.86	546.608	936.812	319.046		887.241	384.092	659.254	227.987
		1317.05	691.043	1050.3	266.745		908.658	269.512	703.881	204.777		1770.58	674.748	1142.52	628.054		1799.16	406.723	1083.1	716.064
		2849.67	733.958	2222.71	626.961		762.046	275.785	427.191	334.855		1442.6	337.282	826.798	615.803		1371.3	207.714	367.04	1004.26
		2168.83	1287.57	1801.25	367.583		404.071	169.924	169.924	234.147		1583.37	642.491	1288.68	294.686		630.207	149.016	513.873	116.334
		3211.53	1353.11	2849.79	361.738		820.37	150.173	150.173	670.197		634.979	118.707	253.506	381.473		974.825	419.185	605.716	369.109
		2309.29	405.745	1244.17	1065.12		664.065	184.219	221.853	442.212		2164.15	981.363	1899.89	264.263		866.495	200.54	277.468	589.027
		2629.71	558.819	2166.94	462.768		822.27	209.598	557.255	265.015		835.431	384.412	651.093	184.338		1362.57	416.672	1295.48	67.0943
		1315.69	373.609	799.245	516.444		406.133	127.096	225.958	180.175		1779.93	513.005	1053.71	726.216		925.143	289.168	388.655	536.488
		2102.77	828.564	1589.9	512.873		995.608	333.085	441.088	554.52		939.779	246.875	405.552	534.227		951.052	285.53	512.337	438.715
		1085.86	584.872	734.693	351.169		447.083	138.721	354.01	93.0733		684.969	173.419	259.243	425.726
		1547.73	324.187	1311.59	236.137		894.952	697.614	719.333	175.619		2299.83	964.022	1756.59	543.236
		726.165	355.503	572.754	153.411		347.489	164.095	216.247	131.243		1322.98	333.548	802.781	520.197
		506.575	394.956	442.262	64.3123		669.127	191.399	206.234	462.893		462.342	88.3687	150.602	311.74
		570.975	228.151	259.804	311.171		558.918	279.927	299.851	259.068		1070.08	315.557	835.476	234.605
		1796.69	330.362	845.326	951.362		1307.39	497.153	965.566	341.829		839.787	358.523	506.996	332.79
		883.217	454.732	595.388	287.828		921.296	324.7	380.663	540.633		831.025	329.849	544.368	286.658
		863.602	242.125	446.884	416.719		1111.28	357.254	782.921	328.357		2000.56	529.569	1339.03	661.535
		1556.36	763.182	1306.26	250.099		406.429	160.544	222.556	183.873		1150.79	380.254	618.47	532.317
		1701.98	813.567	1419.14	282.835		1053.17	524.509	862.318	190.849		1565.33	593.161	1349.69	215.641
		1959.93	837.717	1623.39	336.539		513.006	130.887	130.887	382.118		1796.37	670.406	1225.58	570.789
		1920.39	567.133	1655.56	264.837		439.719	184.066	219.878	219.842		1293.55	299.75	333.509	960.037
		2097.29	774.462	1369.64	727.652		748.658	324.973	460.307	288.352		846.832	386.917	585.126	261.707
		1777.37	647.8	1368.33	409.04		492.553	109.494	109.494	383.059		877.667	268.043	595.498	282.169
		1426.33	641.743	1141.18	285.147		443.165	100.197	280.932	162.234		1554.74	484.872	1274.44	280.299
		2926.18	1030.15	1830.78	1095.4		508.452	202.793	221.443	287.009		1257.87	207.964	344.843	913.031
		3264.44	1056.52	2797.51	466.93		847.147	309.697	646.954	200.194		934.937	274.051	622.482	312.455
		451.427	155.995	172.425	279.002		558.718	213.507	243.177	315.541		1024.14	495.586	806.005	218.14
		369.567	221.75	243.134	126.433		1007.99	375.888	538.627	469.361		2300.77	730.738	1685.46	615.314
		1248.67	361.761	920.509	328.16		360.134	139.028	244.01	116.124		488.056	355.993	385.126	102.929
		643.578	250.174	462.045	181.533		408.424	126.903	212.467	195.957		929.243	357.747	745.864	183.379
		1192	325.088	1035.69	156.309		1356.79	235.536	338.529	1018.26		1436.63	350.696	1251.89	184.735
		440.198	118.417	118.417	321.781		537.678	148.36	148.36	389.318		905.996	284.889	396.33	509.665
		1080.68	355.889	863.39	217.294		779.938	203.187	203.187	576.75		596.563	176.857	229.925	366.638
		555.872	238.855	307.591	248.281		682.198	236.344	560.31	121.888		1046.35	267.523	619.065	427.288
		1273.41	420.93	649.508	623.901		1143.63	412.994	720.157	423.474		2350.95	840.169	1843.4	507.548
		630.474	254.106	390.046	240.428		882.776	291.027	664.623	218.153		637.784	191.948	277.61	360.174
		483.565	175.614	256.7	226.864		671.974	478.514	582.273	89.7003		774.775	237.62	371.656	403.119
		1097.21	541.104	824.797	272.41		521.226	136.134	194.156	327.07		1505.15	483.481	668.038	837.111
		1798.39	484.733	1387.43	410.963		434.049	184.452	184.452	249.597		1381.44	414.313	486.839	894.605
		1387.87	464.385	716.64	671.234		1193.53	313.206	837.424	356.11		1604.78	569.099	1056.1	548.676
		763.517	317.948	682.675	80.8413		405.257	208.138	305.301	99.956		911.905	239.62	500.621	411.284
		677.925	440.554	516.807	161.119		990.238	323.7	586.359	403.879		804.659	273.3	517.203	287.456
		1036.57	342.224	769.04	267.524		561.798	196.282	411.345	150.453		1471.69	354.076	943.334	528.355
		741.79	293.676	450.464	291.326		486.605	208.268	363.003	123.602		1245.21	381.393	920.555	324.656
		577.749	188.881	299.23	278.519		897.964	280.941	280.941	617.022		642.768	166.825	303.453	339.315
		951.808	411.007	568.97	382.839		754.064	212.483	258.084	495.98		1599.57	563.298	1130.6	468.972
		821.909	351.639	418.865	403.045		397.608	129.386	189.856	207.752		896.04	362.91	574.076	321.964
		565.431	176.062	247.833	317.598		324.932	121.688	169.349	155.583		1567.19	500.294	1253.97	313.22
		503.042	126.749	126.749	376.293		835.34	417.926	560.399	274.941		943.406	443.308	482.71	460.696
		566.787	138.421	138.421	428.366		1125.07	713.198	1030.92	94.147		984.617	279.17	582.766	401.851
		605.71	194.358	318.787	286.924		750.575	431.12	595.541	155.034		1168.75	516.867	834.913	333.837
		420.584	169.625	225.568	195.016		1158.8	291.756	602.627	556.176		1465	370.362	611.115	853.882
		1058.33	279.973	343.905	714.421		484.197	163.779	255.765	228.432		1538.31	418.916	988.057	550.252
		703.002	220.324	253.035	449.967		1034.58	283.99	814.789	219.794		1767.47	492.01	1187.8	579.667
		399.339	119.7	119.7	279.639		842.937	208.856	467.152	375.785		1749.66	566.67	1276	473.656
		836.017	266.294	335.61	500.407		502.056	340.975	399.935	102.121		1199.96	409.053	590.174	609.789
		469.852	149.694	173.6	296.252		859.737	160.255	394.497	465.24		1310.02	715	945.874	364.143
		1509.16	772.451	1030.82	478.342		561.033	207.336	307.82	253.213		1339.01	703.412	916.328	422.683
		1082.25	469.512	727.79	354.461		361.763	135.568	135.568	226.195		849.687	455.272	691.315	158.372
		810.966	275.892	389.268	421.698		584.611	151.394	372.542	212.069		414.803	158.969	232.339	182.464
		1029.27	644.432	775.692	253.576		1111.57	725.66	968.052	143.521		1223.83	367.932	1085.7	138.132
		950.898	242.221	350.727	600.171		549.888	219.848	332.534	217.355		1073.51	229.507	287.664	785.847
		925.635	302.124	633.78	291.856		1081.21	467.101	976.223	104.991		2752.65	528.948	1274.82	1477.83
		1618.03	476.187	939.734	678.296		720.79	292.285	520.658	200.131		1284.79	300.084	759.055	525.737
		1263.25	320.988	832.797	430.45		496.202	138.481	256.934	239.268		837.438	364.956	427.581	409.856
		1243.87	548.088	1063.2	180.665		869.468	280.269	389.921	479.547		1061.35	315.338	731.61	329.737
		929.211	222.32	383.169	546.042		380.101	132.174	279.331	100.77		654.896	342.772	419.091	235.805
		1013.6	293.333	471.825	541.776		709.184	216.311	377.766	331.418		899.551	249.886	301.051	598.5
		676.394	221.576	280.028	396.366		888.262	394.36	635.988	252.274		763.346	136.808	265.805	497.541
		1249.6	499.645	1090.12	159.477		737.513	200.314	354.383	383.13		815.089	241.579	560.762	254.328
		997.023	241.632	457.831	539.192		1362.1	651.916	1131.92	230.182		1297.53	430.751	812.215	485.316
		1354.47	584.67	973.688	380.783		1586.33	504.223	1368.91	217.426		667.129	204.713	375.034	292.094
		686.291	133.977	184.811	501.479		906.639	448.572	448.572	458.067		1305.8	326.343	1065.18	240.62
		664.313	182.733	286.702	377.611		466.226	230.043	230.043	236.183		731.952	136.319	151.371	580.581
		779.562	221.151	545.728	233.834		407.987	169.887	205.552	202.435		1738.39	587.204	1352.99	385.401
		1242.07	541.28	1150.7	91.3717		550.714	210.038	326.981	223.733		1149.34	452.33	889.819	259.525
		455.879	181.841	181.841	274.038		462.29	183.712	301.115	161.176		938.774	263.567	494.109	444.665
		1140.44	421.073	793.517	346.928		703.035	189.749	348.716	354.319		1199.49	268.689	299.853	899.635
		869.623	195.465	408.504	461.118		692.664	487.817	607.277	85.3873		746.343	134.821	432.986	313.357
		1201.94	275.328	1005.38	196.561		658.733	232.533	222.867	435.867		1921.91	655.34	1221.63	700.274
		972.346	207.414	495.947	476.399		2220.32	745.973	1510.43	709.891		534.756	160.776	160.776	373.98
		977.137	313.319	545.711	431.426		705.567	203.063	289.029	416.538		1315.96	570.689	1131.74	184.221
		580.728	156.017	249.528	331.2		1148.78	395.352	731.186	417.593		1523.56	391.921	811.056	712.502
		1382.08	383.507	649.158	732.924		558.766	251.107	343.718	215.048		1216.91	321.624	619.057	597.856
		1645.1	644.427	1115.37	529.736		1055.23	316.373	582.696	472.54		782.115	162.023	363.31	418.805
		1398.37	293.037	440.765	957.601		552.607	175.479	480.074	72.533		2241.6	537.644	1703.84	537.761
		839.187	435.283	538.929	300.258		448.306	207.275	247.855	200.451		1947.59	685.248	1201.58	746.015
		1314.16	365.568	924.977	389.188		778.464	193.371	370.638	407.826		1199.1	313.554	538.613	660.483
		514.441	212.983	292.652	221.789		1181.16	591.881	830.765	350.399		1352.64	421.069	1060.52	292.119
		1312.43	583.949	1060.27	252.159		953.571	317.718	422.609	530.962		433.367	129.318	172.654	260.713
		681.893	331.432	375.152	306.742		996.955	527.473	692.725	304.23		1496.12	359.942	689.994	806.121
		840.39	533.75	695.388	145.002		634.183	242.158	301.334	332.849		1549.25	369.964	954.607	594.645
		1570.04	489.021	1204.22	365.82		941.347	537.561	764.639	176.708		1582.91	570.299	744.077	838.836
		783.483	301.838	354.45	429.033		997.035	345.297	613.927	383.108		1136.44	261.995	324.883	811.558
		1091.93	498.742	921.83	170.097		1631.83	562.115	776.46	855.371		687.236	189.969	312.104	375.132
		851.765	301.152	743.384	108.381		721.607	349.486	501.018	220.589		1289.86	467.871	1018.67	271.183
		780.477	535.503	667.136	113.342		632.717	263.163	263.163	369.555		758.761	209.095	475.217	283.545
		1400.04	776.676	1049.83	350.213		1059.36	389.461	698.948	360.407		1101.18	261.063	694.798	406.382
		1087.44	413.933	600.054	487.386		794.346	205.77	445.395	348.952		448.411	125.815	152.431	295.981
		595.862	155.096	155.096	440.765		1073.92	393.911	767.206	306.719		642.18	231.14	403.258	238.922
		1218.41	400.71	812.876	405.53		985.906	228.532	627.116	358.79		1412.1	616.912	900.092	512.004
		1559.62	382.021	675.062	884.557		854.31	343.343	669.408	184.902		1271.62	636.462	1045.02	226.605
		1264.21	602.851	900.449	363.762		1320.44	501.525	901.752	418.686		1589.2	549.49	1195.48	393.719
		1194.01	348.024	591.907	602.098		590.759	253.835	410.485	180.275		1445.93	544.798	1039.98	405.953
		1211.85	407.708	817.738	394.116		475.152	240.466	240.466	234.685		1206.23	302.355	404.618	801.607
		1202.79	603.105	837.039	365.747		855.422	399.122	454.236	401.186		1600.08	637.879	1295.87	304.215
		1234.85	246.138	326.89	907.958		1119.28	202.037	343.565	775.716		1092.16	454.349	692.885	399.272
		1464.85	847.205	1061.1	403.75		621.69	285.378	285.378	336.311		1324.91	378.166	691.86	633.053
		2208.86	625.655	1318.9	889.965		541.742	142.733	142.733	399.009		1350.81	400.17	860.552	490.261
		1873.2	360.4	813	1060.2		550.535	105.848	136.843	413.692		1402.51	334.63	616.557	785.956
		1806.32	707.174	1173.27	633.042		1435.11	480.521	1091.58	343.535		1608.25	558.271	1099.88	508.363
		1622.99	415.37	1200.51	422.48		737.248	266.763	316.685	420.563		1496.79	361.47	967.978	528.814
		1161.15	687.954	754.618	406.534		559.641	192.171	255.433	304.208		1313.5	625.291	1045.81	267.69
		1192.68	663.854	985.615	207.068		685.896	245.633	420.795	265.101		645.022	116.69	193.879	451.143
		1452.87	555.8	1187.8	265.067		573.936	192.76	313.868	260.067		1005.43	429.309	637.073	368.359
		865.113	288.82	288.82	576.293		845.18	204.038	243.731	601.449		1397.09	400.194	1175.7	221.395
		847.066	310.591	448.979	398.087		742.746	254.468	608.556	134.19		535.166	321.342	401.505	133.66
		980.996	472.452	843.909	137.087		654.283	196.365	398.05	256.234		1747.35	467.393	997.843	749.508
		897.501	463.931	696.54	200.962		805.33	221.522	537.465	267.865		575.922	140.431	221.444	354.479
		1220.44	412.855	774.361	446.082		533.986	207.651	358.848	175.138		809.235	256.106	442.041	367.194
		741.637	339.884	591.581	150.056		473.252	135.499	253.519	219.733		701.991	304.425	427.623	274.368
		764.299	519.755	685.203	79.0967		1312.85	256.088	839.195	473.656		1340.66	490.786	1088.26	252.396
		861.607	272.042	619.093	242.514		419.172	113.049	161.601	257.571		1939.12	438.004	1456.41	482.711
		1386.5	379.428	1057.19	329.308		1061.79	315.18	711.588	350.203		788.593	362.365	621.921	166.672
		689.17	296.652	442.147	247.022		647.035	200.007	352.078	294.957		1247.09	644.319	869.075	378.013
		1307.39	269.106	695.013	612.382		994.75	211.209	517.927	476.823		1100.76	584.238	728.613	372.146
		1563.97	613.26	1332.6	231.369		658.342	204.951	360.698	297.645		850.12	233.094	442.559	407.561
		976.833	347.536	582.74	394.093		874.387	191.097	223.696	650.691		1416.12	474.785	1148.5	267.615
		774.469	245.553	499.669	274.801		1553.93	331.074	1174.85	379.081		815.948	267.958	537.314	278.634
		2429.24	454.881	1805.35	623.895		920.506	314.075	472.455	448.05		1414.91	356.419	718.433	696.479
		919.429	278.156	771.264	148.166		1341.46	322.834	835.741	505.723		869.689	311.541	540.259	329.43
		936.099	655.937	843.688	92.4103		1263.7	659.847	924.401	339.296		666.057	147.906	204.643	461.414
		775.835	317.035	578.324	197.511		586.728	196.359	239.018	347.71		562.854	219.633	219.633	343.221
		746.45	326.742	479.247	267.203		534.172	193.947	263.612	270.56		1577.38	395.748	744.732	832.648
		1279.3	550.861	863.182	416.121		1203.64	268.135	417.925	785.72		1986.83	597.039	1100.49	886.344
		1088.71	516.635	935.273	153.435		664.149	282.534	424.318	239.831		1893.23	671.216	929.604	963.631
		1317.37	260.265	508.525	808.849		1343.21	420.988	716.602	626.605		1513.22	277.27	344.818	1168.4
		1982.56	1018.35	1760.63	221.933		1207.45	537.05	933.186	274.269		2429.9	675.732	1176.79	1253.11
		1550.33	676.933	1180.73	369.6		739.306	150.459	321.514	417.792		545.93	201.035	311.808	234.122
		1259.17	403.019	976.094	283.076		587.496	316.85	349.879	237.617		2856.49	473.311	2497.05	359.444
		1301.29	893.767	1115.46	185.833		1093.82	621.075	788.628	305.189		2563.92	888.506	1098.16	1465.76
		803.538	307.936	556.986	246.552		932.875	258.932	578.449	354.426		1316.78	505.08	537.005	779.779
		654.404	211.155	493.517	160.887		650.415	285.375	301.486	348.928		734.262	126.943	195.629	538.633
		347.267	146.745	163.201	184.066		759.169	346.419	551.08	208.089		827.566	458.061	619.88	207.687
		1876.19	815.255	1602.6	273.591		899.271	277.007	413.616	485.656		1145.18	567.047	963.928	181.25
		1062.7	416.275	510.417	552.288		1439.38	1019.39	1224.99	214.389		1310.17	454.934	994.997	315.174
		1268.79	642.89	1020.67	248.12		1422.53	306.54	1177.12	245.403		1536.18	841.517	1240.66	295.517
		1298.2	407.138	909.691	388.507		381.321	136.891	322.469	58.852		1113.52	493.515	870.475	243.047
		944.153	450.976	795.729	148.424		701.409	312.911	461.326	240.083		1160.95	431.145	926.163	234.792
		689.698	315.52	550.969	138.729		835.352	449.633	595.585	239.767		1544.68	275.958	843.579	701.103
		685.363	289.609	359.595	325.767		1611.27	397.984	1115.17	496.1		908.99	423.773	592.91	316.08
		986.008	237.567	339.854	646.154		490.681	166.26	210.55	280.131		1325.45	242.395	620.857	704.597
		760.493	164.401	365.774	394.719		651.557	108.411	360.406	291.152		636.975	302.983	480.768	156.207
		1420.24	401.601	953.479	466.759		1389.46	329.826	1017.22	372.238		1686.07	477.022	1108.66	577.403
		1440.12	484.582	1121.62	318.502		795.19	292.044	526.003	269.188		869.142	317.845	554.084	315.057
		1176.62	495.59	597.887	578.732		373.277	141.926	289.267	84.01		630.185	173.804	484.92	145.265
		565.962	324.146	362.625	203.337		852.121	181.995	392.043	460.077		2118.48	601.628	1559.67	558.81
		845.503	293.693	513.461	332.043		480.91	248.557	339.496	141.414		1313.43	206.444	573.908	739.518
		524.959	196.285	332.194	192.765		368.689	217.097	264.449	104.241		1477.41	248.762	656.189	821.225
		1454.79	371.186	846.178	608.613		336.516	236.012	236.012	100.504		1172.72	329.756	620.662	552.063
		1148.25	321.07	801.29	346.958		567.104	323.598	438.047	129.057		1031.81	327.604	889.77	142.035
		1405.24	574.191	1174.37	230.869		606.881	324.517	465.615	141.265		1485.31	472.337	609.085	876.227
		714.232	302.005	520.174	194.059		570.734	362.711	464.677	106.057		1116.2	480.601	834.719	281.483
		844.448	362.083	617.162	227.287		1180.28	229.621	427.303	752.98		1431.44	261.098	455.681	975.763
		1459.88	500.422	1047.89	411.986		371.158	300.328	300.328	70.83		558.996	202.053	446.243	112.753
		974.395	478.636	825.315	149.08		866.427	205.648	249.295	617.132		1979.36	520.17	1558.56	420.805
		736.667	248.48	400.645	336.022		1103.87	346.736	919.479	184.388		995.939	391.874	769.985	225.954
		1599.27	446.85	1246.51	352.766		733.494	204.309	272.547	460.946		639.993	298.856	558.984	81.0093
		1555.43	483.743	1095.84	459.591		626.272	165.542	359.925	266.347		769.238	222.049	222.049	547.189
		1279.03	322.458	877.877	401.148		1493.45	410.783	600.383	893.068		749.338	306.658	578.78	170.558
		941.626	304.001	320.333	621.293		1168.81	397.095	701.543	467.262		645.587	188.047	289.137	356.45
		863.775	246.561	466.503	397.273		923.349	474.92	677.373	245.977		1735.3	296.269	1302.08	433.218
		1627.02	336.467	1136.22	490.798		646.269	244.382	299.768	346.5		1689.52	575.216	1460.52	228.996
		1725.44	615.992	1315.97	409.471		631.642	215.075	493.083	138.559		1624.8	651.568	1408.9	215.896
		585.737	176.398	286.103	299.634		629.998	296.89	375.193	254.805		1239.33	226.364	967.096	272.232
		677.592	278.803	438.761	238.831		747.147	313.401	632.298	114.849		1291.51	431.658	485.186	806.324
		661.857	296.074	362.206	299.651		566.698	178.664	222.648	344.05		1395.11	636.168	748.675	646.43
		1221.83	851.892	1061.64	160.186		905.915	622.382	795.317	110.597
		867.616	263.162	431.362	436.254		706.756	222.893	293.669	413.087
		1463.12	567.968	1154.39	308.729		639.922	146.705	359.64	280.283
		1376.19	553.943	1199.29	176.906		548.128	188.191	411.886	136.243
		1854.18	525.616	1517.93	336.249		679.599	198.124	481.027	198.572
		1190.7	689.361	823.041	367.655		521.044	133.904	133.904	387.14
		677.838	261.842	407.091	270.747		2723.22	965.89	2298.1	425.114
		1674.35	669.034	1445.53	228.824		725.84	248.801	383.083	342.757
		1408.5	488.226	888.537	519.966		1139.6	273.58	462.961	676.642
		1038.64	521.186	691.975	346.662		1533.05	918.32	1502.59	30.456
		644.831	253.37	282.28	362.551		1249.65	409.009	1042.42	207.225
		804.793	227.821	607.373	197.42		933.132	507.787	751.446	181.687
		847.092	294.085	694.558	152.534		1599.51	285.845	792.848	806.659
		662.092	356.127	587.178	74.9137		619.917	121.448	173.613	446.304
		480.917	230.281	327.235	153.682		645.525	183.639	422.764	222.761
		864.329	223.47	439.71	424.619		1400.02	211.556	321.826	1078.19
		735.66	303.791	468.755	266.904		1244.29	598.94	860.317	383.976
		721.166	223.95	447.848	273.318		1839.24	563.781	928.366	910.878
		1172.01	536.547	793.827	378.179		1467.86	191.763	336.188	1131.67
		1381.85	742.649	1030.97	350.88		1435.66	321.108	773.554	662.106
		546.396	252.902	452.076	94.3197		1300.54	454.47	693.191	607.346
		1471.74	471.41	1164.82	306.919		1337.76	319.225	618.65	719.108
		1395.22	531.112	1071.97	323.248		759.488	316.042	539.311	220.176
		837.249	347.485	756.955	80.294		894.849	549.188	602.273	292.576
		612.645	146.949	146.949	465.697		604.491	345.074	496.985	107.506
		1350.38	279.963	1131.45	218.929		1985.11	581.357	1151.48	833.629
		1230.94	327.851	839.707	391.229		618.192	323.872	497.958	120.234
		1620.31	745.485	1293.12	327.192		972.401	266.366	493.17	479.231
		1428.48	476.34	685.958	742.521		317.187	222.811	245.531	71.656
		802.939	344.927	558.434	244.505		512.592	127.985	127.985	384.607
		1022.5	339.721	767.569	254.93		769.031	429.038	551.346	217.685
		1099.45	508.345	641.609	457.84		699.658	301.449	466.489	233.169
		966.8	372.072	474.711	492.089		868.513	159.92	473.582	394.931
		1057.69	249.364	603.159	454.537		643.547	277.913	291.734	351.813
		3561.87	1225.02	2965.35	596.517		884.203	381.911	522.761	361.442
		1186.25	317.327	668.603	517.645		871.948	286.299	462.912	409.036
		2688.94	742.838	1915.71	773.222		1088.72	281.426	730.28	358.44
		1023.17	238.312	265.461	757.714		626.109	170.799	217.34	408.769
		618.715	240.95	354.698	264.017		396.664	209.574	227.301	169.363
		1572.27	562.759	937.133	635.14		683.843	282.702	386.157	297.687
		1216.26	497.736	1097.9	118.359		793.894	520.659	621.999	171.895
		1477.99	517.759	1144.46	333.532		939.048	355.464	512.572	426.476
		2516.48	869.407	1934.84	581.644		896.94	241.22	386.378	510.562
		1473.43	491.449	1133.17	340.255		1584.1	423.863	1006.39	577.714
		1420.45	394.356	1261.62	158.825		1042.26	287.898	494.31	547.949
		596.267	290.921	405.197	191.07		1018.49	513.794	795.229	223.265
		1458.79	405.069	801.582	657.207		624.307	124.488	170.371	453.936
		1598.63	524.728	1286.85	311.783		1797.34	291.154	613.953	1183.38
		1111.63	438.517	607.909	503.726		1307.22	408.073	1050.1	257.118
		1528.46	540.985	1248.73	279.726		385.276	131.961	166.939	218.337
		1570.38	600.514	1484.85	85.5333		1028.85	351.319	685.8	343.046
		1678.31	613.281	776.67	901.642		1584.44	543.672	1011.12	573.317
		1769.84	532.273	835.449	934.386		741.86	280.381	311.612	430.248
		1445.36	440.305	1154.36	290.997		793.522	381.672	381.672	411.85
		969.913	266.754	323.599	646.315		1906.16	570.855	1009.11	897.05
		609.177	196.795	259.651	349.526
		850.568	536.947	669.825	180.743
		1222	341.143	1086.1	135.899
		1263.88	395.912	859.116	404.762
		2832.83	824.591	1495.92	1336.91
		1653.17	415.589	1184.06	469.111
		2280.2	1022.63	1854.99	425.213
		1143.52	557.563	987.629	155.892
		500.918	347.37	404.257	96.661
		752.69	188.36	359.185	393.506
		3327.66	962.215	2807.01	520.654
		881.63	343.398	433.639	447.991
		1362.13	316.917	718.85	643.28
		1730.12	521.502	863.411	866.712
		1524.68	602.898	1136.26	388.429
		944.548	260.421	806.993	137.555
		3159.74	747.162	2787.84	371.901
		1827.11	622.345	1260.47	566.636
		1640.16	537.172	1026.98	613.177
		1527.46	666.474	1187.51	339.953
		3623.3	1265.65	3362.54	260.761
		2122.42	657.345	1159.55	962.874
		1583.12	524.057	1167.17	415.95
