# Supplementary material for: Sequential phosphorylation of NDEL1 by the DYRK2-GSK3β complex is critical for neuronal morphogenesis
Source: eLife. 2019 Dec 9;8:e50850. doi: 10.7554/eLife.50850 (PMC6927744; doi:10.7554/eLife.50850)
Supplement: Figure 2—source data 2. [file elife-50850-fig2-data2.xlsx]

## Sheet: Fig 2D-F axon-dendrite assay
	Figure 2D-F. Axon/dendrite outgrowth analysis for NDEL1 and kinases over-expression groups
		Control + hDYRK2 + hGSK3β S9A					NDEL1 WT + hDYRK2 + hGSK3β S9A					NDEL1 Ala + hDYRK2 + hGSK3β S9A
	Number of values	106					71					61
		total length	the longest neurite length	axonal length	dendritic length		total length	the longest neurite length	axonal length	dendritic length		total length	the longest neurite length	axonal length	dendritic length
	Mean	961.9	439.9	759.4	202.5		1176	523.4	958.2	218.2		959.4	448.8	758.5	197.6
	Std. Deviation	377.6	186.5	361.4	102.8		368.5	169.8	338.2	116.9		299.2	178.4	299.9	114.1
	Std. Error	36.68	18.12	35.1	9.988		43.73	20.15	40.14	13.87		38.31	22.84	38.4	14.61
	Lower 95% CI	889.2	404	689.8	182.7		1089	483.2	878.2	190.6		882.7	403.1	681.7	168.3
	Upper 95% CI	1035	475.8	829	222.3		1264	563.6	1038	245.9		1036	494.5	835.3	226.8
		870.706	656.518	840.097	30.6089		1132.6	861.227	1049.23	83.3687		945.194	367.477	724.499	220.694
		322.325	258.21	269.615	52.7107		1018.92	595.465	889.385	129.534		588.68	246.465	422.35	166.33
		1069.3	405.913	765.491	303.81		995.556	664.909	931.772	63.7835		539.933	184.651	203.34	336.593
		770.038	269.071	646.331	123.707		462.442	320.665	352.216	110.226		658.842	189.733	171.75	297.359
		450.842	281.755	315.758	135.084		941.951	421.848	805.68	136.271		1495.39	536.699	1351.31	144.077
		443.536	125.764	319.514	124.022		1217.66	792.665	984.973	232.686		1735.47	486.946	1449.1	286.366
		711.727	224.223	482.215	229.512		753.273	472.552	684.473	68.8002		1067.37	316.977	954.239	113.127
		1028.66	557.66	792.86	235.797		1261.02	392.607	978.14	282.881		597.253	233.366	333.736	263.517
		821.61	459.847	535.644	285.966		1176.06	612.302	1065.56	110.505		1545.79	900.923	1488.08	57.7094
		1339.22	814.811	1188.12	151.104		1131.67	605.822	1022.87	108.792		972.16	631.17	800.488	171.673
		760.439	409.155	557.049	203.39		1252.82	395.564	1099.59	153.234		1063.48	412.306	795.111	268.373
		634.03	526.512	554.566	79.4648		968.175	232.926	752.399	215.775		694.693	319.11	513.008	181.685
		902.56	365.553	541.967	360.593		890.755	431.652	738.154	152.602		890.578	663.097	729.069	161.509
		595.806	360.557	452.84	142.965		1453.33	688.831	1123.36	329.967		1401.17	732.876	1200.36	200.818
		612.698	247.524	488.974	123.724		1078.9	417.017	720.225	358.681		1435.47	739.622	1291.12	144.356
		1214.08	632.509	1163.26	50.819		835.758	460.129	726.193	109.564		1121.4	424.108	907.218	214.18
		788.342	583.21	619.276	169.066		1227.32	364.723	1188.44	38.8809		773.576	348.937	636.903	136.672
		448.355	167.69	300.397	147.958		1031.03	501.516	739.031	291.999		1053.02	383.76	681.417	371.598
		753.302	428.697	582.611	170.69		846.646	450.758	761.26	85.3864		782.567	256.936	700.279	82.2884
		537.298	264.704	382.909	154.389		2267.75	1191.35	1825.12	442.635		1416.13	599.956	1243.57	172.564
		1939.84	765.746	1734.68	205.154		596.239	240.883	319.2	277.039		1117.11	355.349	1019.78	97.3359
		664.924	217.087	453.847	211.077		1278.74	503.951	1044.43	234.305		996.101	367.599	627.54	368.561
		1547.7	810.996	1362.83	184.872		1263.23	756.305	1078.28	184.953		869.458	472.059	826.144	43.3139
		1062.89	313.628	700.427	362.462		1870.64	584.495	1628.81	241.833		916.475	508.498	768.036	148.439
		1737.01	482.665	1492.7	244.314		940.251	601.075	762.342	177.91		1063.47	443.172	811.11	252.356
		1260.96	415.133	769.255	491.709		843.012	289.308	613.836	229.176		603.883	391.659	412.371	191.512
		953.158	319.534	552.333	400.825		927.772	399.603	730.837	196.935		752.38	479.935	629.962	122.418
		720.819	288.39	476.684	244.135		1304.04	659.312	955.995	348.042		516.092	238.641	426.529	89.563
		918.757	501.867	757.931	160.826		1673.13	747.124	1462.71	210.415		886.129	337.584	592.234	293.895
		786.552	326.838	517.55	269.002		1356.47	492.227	1209.42	147.054		1029.86	662.427	920.207	109.649
		645.038	261.124	467.877	177.161		1392.38	514.025	1037.95	354.433		1038.87	661.806	1004.37	34.4984
		876.734	601.202	775.128	101.606		638.095	267.252	465.517	172.578		681.489	362.718	655.518	25.9704
		1273.73	680.832	901.062	372.667		965.571	513.126	748.786	216.785		807.757	396.83	560.348	247.41
		450.477	271.336	388.414	62.0624		1443.74	529.272	1128.92	314.82		671.112	346.186	483.262	187.851
		1716.9	753.741	1624.58	92.3237		791.374	434.683	508.909	282.465		1355.05	1002.86	1252.52	102.534
		648.739	260.437	394.896	253.843		1419.67	565.145	746.79	672.885		721.65	496.014	669.5	52.1498
		1172.56	372.613	805.488	367.07		1180.38	670.977	912.063	268.314		1147.12	529.657	979.76	167.359
		456.533	154.575	292.635	163.898		1102.49	650.024	749.67	352.818		545.197	337.208	476.758	68.4398
		716.188	292.357	529.299	186.888		928.68	517.72	825.409	103.272		776.802	372.559	663.003	113.8
		438.624	209.263	254.618	184.006		843.259	547.823	743.803	99.4561		710.046	261.54	613.349	96.6969
		1458.52	690.824	1361.14	97.3866		1462.67	531.96	1118.29	344.382		856.363	500.396	712.683	130.168
		996.756	343.757	641.174	355.582		1298.96	548.787	970.267	328.693		992.728	422.534	649.992	342.736
		875.232	311.388	757.071	118.162		1146.56	552.162	1039.96	106.596		842.058	377.735	598.484	243.574
		1221.81	512.662	905.081	316.726		1373.28	591.84	1178.44	194.847		659.86	206.665	457.587	202.273
		998.706	495.993	687.678	311.027		2433.1	864.253	2249.79	183.306		607.547	313.872	518.206	89.3402
		1380.34	499.472	1160.02	220.327		630.436	273.798	393.95	236.485		1051.48	635.549	946.702	104.777
		527.104	276.462	395.065	132.038		916.539	551.476	814.212	102.328		1071.06	538.528	969.399	101.659
		722.922	340.509	567.816	155.106		1392.89	572.11	1167.31	225.584		1157.01	466.693	667.35	489.661
		1323.47	417.033	1166.02	157.45		1603.43	473.546	1459.22	144.209		625.922	305.237	533.248	92.6739
		908.233	509.684	759.973	148.26		1705.91	523.989	1509.57	196.349		995.922	418.39	733.411	262.512
		734.81	290.315	566.648	168.162		1103.3	582.335	929.739	173.559		1160.73	599.385	925.191	235.54
		1171.83	537.176	748.746	423.085		1114.37	793.667	921.346	193.021		673.309	366.812	515.206	158.104
		1236.81	732.971	941.152	295.658		1044.52	513.879	901.215	143.307		1429.03	552.901	988.031	440.994
		431.982	214.173	245.843	186.14		1402.16	553.459	1183.76	218.407		1371.76	625.39	1039.35	332.411
		604.675	254.132	467.947	136.729		1446.58	514.02	912.26	534.315		848.598	470.245	722.17	126.427
		1847.73	601.255	1587.47	260.256		1072.85	362.77	934.708	138.138		1195.2	393.871	693.231	501.967
		300.291	141.135	211.596	88.6952		1183.61	521.058	1049.96	133.645		1365.97	429.054	947.3	418.671
		1252.29	553.915	1043.06	209.235		1291.34	313.714	1147.24	144.102		1500.76	926.187	1341.53	159.23
		490.67	207.524	268.624	222.047		929.315	405.45	719.466	209.849		793.984	251.225	404.319	389.665
		1462.2	541.744	1244	218.199		847.42	304.968	737.253	110.168		662.795	237.264	430.717	232.079
		846.27	420.668	689.183	157.087		1706.12	673.571	1343.23	362.886		675.7	338.358	484.296	191.404
		655.352	277.324	384.214	271.138		1600.4	468.741	1167.35	433.055
		1292.52	376.562	1169.92	122.595		1061.74	305.775	819.75	241.994
		879.266	503.846	688.863	190.402		854.916	427.498	675.738	179.178
		1652.99	770.342	1448.62	204.374		1158.88	765.606	1055.17	103.709
		453.646	242.367	418.817	34.8292		747.718	305.939	389.539	358.179
		777.424	335.124	559.353	218.071		857.797	321.233	628.303	229.495
		1347.74	415.917	1104.81	242.925		1062.67	390.662	959.899	102.77
		847.541	456.645	752.481	95.0602		780.582	461.637	655.186	125.395
		747.542	264.67	405.17	342.372		2019.22	703.467	1659.93	359.285
		442.178	284.57	315.358	126.82		1575.49	629.193	1228.76	346.731
		810.031	279.492	515.555	294.476
		1440.57	776.246	1282.96	157.609
		1243.62	462.215	1052.56	191.061
		1249.2	274.341	761.504	487.701
		1464.31	518.761	1121.58	342.736
		1329.76	799.409	1103.86	225.907
		1103.01	422.925	968.738	134.271
		1519.94	508.329	1214.61	305.329
		1744.64	1077.58	1390.56	354.078
		910.446	398.3	782.447	127.999
		774.17	581.539	732.78	41.3898
		1184.76	568.569	946.582	238.173
		879.289	499.854	745.089	134.2
		1550.78	847.741	1442.89	107.896
		1329.61	368.521	1070.29	259.323
		1690.78	705.18	1458.77	232.009
		946.738	572.777	641.886	304.853
		1167.49	588.68	1059.59	107.899
		1039.53	616.2	878.279	161.25
		806.179	381.57	648.502	157.677
		1529.81	521.218	1337.55	192.258
		733.93	421.119	624.335	109.595
		1009.22	489.791	905.79	103.426
		706.438	362.31	513.975	192.462
		896.64	218.744	314.657	581.984
		594.533	222.134	293.628	300.905
		822.175	487.181	767.696	54.4798
		1236.91	579.921	1067.91	169.007
		458.286	219.94	353.019	105.267
		1001.92	479.742	812.041	189.879
		730.443	414.769	584.017	146.427
		961.233	764.018	817.001	144.232
		644.983	293.248	487.984	157
		717.088	282.424	528.441	188.648
		782.2	463.502	556.515	225.686
