# Supplementary material for: Sequential phosphorylation of NDEL1 by the DYRK2-GSK3β complex is critical for neuronal morphogenesis
Source: eLife. 2019 Dec 9;8:e50850. doi: 10.7554/eLife.50850 (PMC6927744; doi:10.7554/eLife.50850)
Supplement: Figure 2—source data 3. [file elife-50850-fig2-data3.xlsx]

## Sheet: Fig 2G-I axon-dendrite assay
	Figure 2G-I. axon/dendrite outgrowth assay of NDEL1 S336/332A KI
		Control - EGFP Knock-In					NDEL1 S336/332A + EGFP Knock-In
	Number of values	48					54
		total length	the longest neurite length	axonal length	dendritic length		total length	the longest neurite length	axonal length	dendritic length
	Mean	928.5	367	602.7	325.8		704.8	257.8	426.1	278.7
	Std. Deviation	446.3	236	355.3	233.3		375.7	147.1	259.6	232.2
	Std. Error	64.42	34.06	51.29	33.68		51.12	20.01	35.32	31.6
	Lower 95% CI	798.9	298.4	499.5	258		602.3	217.7	355.3	215.3
	Upper 95% CI	1058	435.5	705.9	393.6		807.4	298	497	342.1
		731.33	416.499	495.548	235.781		321.432	189.656	232.706	88.7256
		2019.73	605.056	1330.3	689.427		292.706	101.743	207.81	84.8961
		697.712	179.994	418.343	279.369		362.546	100.243	128.633	233.914
		425.726	302.004	352.607	73.1185		268	164.017	186.328	81.6718
		608.662	229.246	386.302	222.36		1000.09	489.647	880.714	119.373
		388.189	168.962	309.494	78.6944		385.182	260.385	358.818	26.3633
		490.381	248.039	362.377	128.004		1201.12	432.745	907.118	294.005
		694.389	272.452	508.299	186.089		276.037	136.765	178.789	97.2477
		989.485	386.987	598.693	390.793		369.218	172.862	270.811	98.407
		558.283	212.443	311.103	247.18		539.264	231.321	303.418	235.846
		716.919	331.879	531.995	184.924		781.184	258.109	427.285	353.899
		713.35	125.521	246.168	467.183		321.345	187.565	212.889	108.457
		1183.54	606.385	730.226	453.311		737.489	381.905	501.659	235.829
		744.937	263.44	461.062	283.874		696.218	369.965	450.774	245.444
		1303.54	616.571	1061.59	241.952		1394.75	528.912	1343.83	50.9178
		793.068	246.393	504.104	288.964		1408.49	506.454	922.431	486.062
		943.637	185.6	567.031	376.606		652.56	190.568	426.114	226.446
		867.195	493.254	653.882	213.314		472.88	191.417	250.257	222.624
		868.9	514.277	637.367	231.532		1184.9	312.492	999.825	185.075
		265.636	64.508	163.43	102.205		440.168	207.738	254.062	186.106
		985.941	426.193	724.416	261.525		400.363	130.849	177.506	222.857
		825.268	320.489	536.952	288.317		368.706	124.542	306.432	62.2739
		1227.73	674.552	1128.85	98.8781		306.445	115.435	229.795	76.65
		959.663	426.804	513.411	446.252		444.272	230.533	349.827	94.4449
		799.804	261.122	612.605	187.199		411.168	177.194	384.258	26.9099
		1509.76	693.6	1226.69	283.068		775.742	288.293	750.699	25.0439
		552.005	182.999	288.079	263.926		655.217	385.912	535.042	120.175
		855.242	396.12	579.103	276.14		510.379	150.256	284.574	225.806
		425.742	139.104	160.18	265.562		744.177	199.959	286.259	457.917
		750.393	393.277	576.442	173.951		453.111	142.301	142.301	310.81
		731.781	164.507	280.107	451.674		392.259	117.516	266.147	126.112
		2059.6	1028.54	1886.14	173.463		481.325	169.336	304.27	177.056
		709.402	371.222	576.61	132.792		502.273	175.247	271.681	230.592
		394.396	142.372	246.306	148.09		1119.2	446.966	474.147	645.052
		833.484	281.127	651.381	182.103		754.586	342.242	471.335	283.251
		1171.36	708.691	920.757	250.603		438.063	178.207	238.691	199.372
		458.556	135.507	211.917	246.639		721.003	305.14	329.478	391.525
		1647.66	1282.92	1439.7	207.961		1765.66	686.671	1087.55	678.11
		516.2	137.577	328.716	187.484		821.391	326.211	347.705	473.686
		924.081	279.564	493.095	430.985		792.28	194.552	551.194	241.087
		655.236	201.709	311.338	343.898		1276.26	483.364	509.932	766.326
		973.483	237.331	400.548	572.935		538.393	255.367	506.258	32.1344
		1469.63	447.183	530.546	939.079		890.224	202.937	377.105	513.119
		504.535	136.802	337.884	166.651		1007.29	208.84	434.274	573.012
		1457.02	472.26	1024.79	432.222		276.396	121.224	246.47	29.9261
		1712.76	421.03	749.076	963.681		725.377	202.455	344.014	381.363
		1640.78	472.204	936.624	704.154		596.712	81.9995	322.422	274.29
		1811.18	309.743	626.674	1184.5		790.045	427.408	540.675	249.37
							731.431	172.863	496.868	234.563
							477.718	142.106	250.513	227.206
							778.426	126.684	140.252	638.173
							1257.92	291.616	323.902	934.021
							897.881	171.673	509.636	388.246
							1853.6	731.954	774.333	1079.27
