# Supplementary material for: Sequential phosphorylation of NDEL1 by the DYRK2-GSK3β complex is critical for neuronal morphogenesis
Source: eLife. 2019 Dec 9;8:e50850. doi: 10.7554/eLife.50850 (PMC6927744; doi:10.7554/eLife.50850)
Supplement: Figure 3—source data 1. [file elife-50850-fig3-data1.xlsx]

## Sheet: Fig 3B arbor sholl
	Figure 3B. Neuronal arborization analysis for knockdown and rescue groups - sholl analysis
	Scrambled shRNA
	Radius	Mean	SEM	N
	0	1	0	43		1	1	1	1	1	1	1	1	1	1	1	1	1	1	1	1	1	1	1	1	1	1	1	1	1	1	1	1	1	1	1	1	1	1	1	1	1	1	1	1	1	1	1
	10	4.51163	0.412125			2	1	5	2	3	3	3	5	4	9	3	1	5	4	3	6	9	1	6	2	3	2	6	7	6	8	3	9	2	3	2	5	2	2	1	8	4	8	4	11	6	5	10
	20	14.0465	0.635733			12	12	12	10	13	9	12	17	18	15	11	11	18	12	13	16	19	10	24	14	16	13	12	15	21	15	17	20	15	22	11	15	7	6	10	16	9	11	11	14	23	17	10
	30	17.4651	0.642142			19	18	21	16	20	19	14	19	12	19	18	23	20	13	22	27	16	12	19	14	20	22	12	17	15	18	18	23	23	21	11	13	14	17	16	21	14	14	14	9	27	19	12
	40	16.6977	0.677543			23	15	13	17	18	20	11	17	11	20	19	15	17	13	16	22	14	15	11	18	22	26	14	15	16	16	19	18	24	20	11	10	14	11	16	23	17	10	20	9	27	20	15
	50	15.5349	0.66084			21	14	13	18	14	17	15	17	10	21	18	11	15	15	15	19	12	16	7	11	22	23	14	14	15	11	20	13	20	20	11	14	14	10	20	21	12	11	22	8	25	17	12
	60	13.3488	0.704269			20	14	14	16	12	15	15	17	7	19	19	5	13	13	11	18	10	12	5	12	17	19	14	12	14	7	20	10	17	16	5	13	9	12	13	27	10	10	15	6	17	12	12
	70	11.1163	0.700585			14	11	12	12	11	11	15	15	8	12	17	3	9	11	7	17	9	11	3	8	19	21	13	10	10	4	15	7	13	13	3	12	6	13	13	21	6	10	14	3	17	11	8
	80	9.02326	0.588265			9	8	10	14	7	10	13	9	8	10	15	2	8	10	4	16	6	10	3	8	14	18	10	8	7	2	13	6	10	9	3	10	4	10	11	18	6	8	7	7	12	8	7
	90	7.27907	0.529658			7	8	9	9	4	9	9	6	6	9	17	4	6	11	1	13	5	10	3	6	13	12	10	8	5	2	11	5	6	7	1	7	3	9	11	12	3	4	5	6	6	8	7
	100	5.18605	0.34303			6	7	5	8	2	7	7	6	5	9	10	4	5	7	1	6	4	7	3	4	6	8	4	7	4	2	8	6	4	5	1	3	1	5	8	8	3	2	5	6	3	6	5
	110	4.48837	0.336703			5	3	2	8	1	7	3	4	4	6	9	4	4	6	2	4	3	5	4	2	4	7	4	7	5	4	8	5	4	4	1	1	1	4	9	8	3	3	4	6	2	8	5
	120	4.41861	0.31611			6	2	2	4	2	6	5	4	5	4	6	6	5	7	3	4	3	4	4	1	4	8	2	6	6	8	7	3	3	2	2	2	1	4	5	10	4	4	3	6	3	7	7
	130	4.02326	0.348209			6	2	1	3	2	3	4	4	5	5	5	7	8	4	4	2	2	6	3	1	3	8	2	4	4	5	5	3	3	2	2	2	1	4	5	13	4	4	2	4	3	7	6
	140	3.55814	0.279024			6	2	1	4	2	3	4	4	4	5	4	4	8	4	5	2	2	4	3	1	2	6	1	4	1	5	3	3	3	3	2	2	1	4	3	8	3	4	2	4	3	8	6
	150	3.65116	0.318989			9	4	1	4	3	3	4	2	3	7	5	3	9	2	6	1	2	4	3	3	4	6	1	4	0	5	0	3	4	1	2	2	1	6	4	5	4	5	2	6	5	4	5
	160	3.46512	0.300146			7	4	2	4	3	3	5	2	2	7	3	3	8	2	6	0	3	4	4	4	3	7	1	4	0	5	0	5	2	2	2	3	2	4	4	1	4	5	1	7	4	4	3
	170	3.04651	0.291924			4	5	2	2	3	2	7	2	1	7	3	3	6	3	7	0	4	4	3	3	3	5	1	2	0	1	0	3	0	2	3	3	2	3	4	0	5	4	2	6	5	4	2
	180	2.51163	0.264914			2	3	2	1	4	2	5	2	1	6	2	3	2	4	5	0	1	3	4	3	3	4	2	0	0	1	0	3	0	1	4	3	2	1	3	0	5	4	5	6	4	0	2
	190	2	0.297647			2	3	2	0	7	3	4	1	0	6	2	4	1	2	4	0	0	2	4	4	0	1	0	0	0	0	0	2	0	1	5	2	2	0	3	0	2	4	5	3	5	0	0
	200	1.90698	0.405955			2	2	2	0	5	4	4	1	0	5	1	5	0	2	4	0	0	1	4	2	0	0	0	0	0	0	0	2	0	0	15	4	2	0	2	0	1	3	3	2	4	0	0
	210	1.34884	0.246535			1	1	2	0	3	1	2	0	0	3	1	4	0	2	3	0	0	1	3	2	0	0	0	0	0	0	0	2	0	0	7	5	1	0	2	0	2	2	2	2	4	0	0
	220	1.2093	0.217094			1	0	2	0	3	1	1	0	0	2	1	5	0	3	2	0	0	1	2	4	0	0	0	0	0	0	0	2	0	0	3	5	1	0	2	0	2	2	2	2	3	0	0
	230	0.930233	0.214108			0	0	2	0	1	1	0	0	0	1	1	4	0	3	0	0	0	1	2	2	0	0	0	0	0	0	0	2	0	0	1	7	1	0	1	0	1	2	2	2	3	0	0
	240	0.651163	0.199345			0	0	6	0	1	0	0	0	0	0	1	1	0	3	0	0	0	0	1	2	0	0	0	0	0	0	0	1	0	0	2	5	0	0	0	0	1	0	2	1	1	0	0
	250	0.465116	0.167546			0	0	6	0	0	0	0	0	0	0	1	1	0	3	0	0	0	0	2	1	0	0	0	0	0	0	0	1	0	0	1	2	0	0	0	0	0	0	1	0	1	0	0
	NDEL1 shRNA
	Radius	Mean	SEM	N
	0	1	0	26		1	1	1	1	1	1	1	1	1	1	1	1	1	1	1	1	1	1	1	1	1	1	1	1	1	1
	10	8.30769	0.648713			12	12	8	2	4	8	6	5	10	12	6	9	15	4	9	8	12	13	8	6	11	9	6	10	8	3
	20	13.6539	0.844789			10	13	11	12	8	17	9	13	15	22	15	15	18	7	11	15	10	12	22	9	18	17	18	17	15	6
	30	13.6154	0.854089			13	15	8	22	16	20	6	12	11	15	15	14	17	6	14	13	10	14	24	10	12	18	13	15	12	9
	40	11.0385	0.847586			13	9	5	16	7	15	5	11	7	12	11	13	16	7	11	10	7	8	25	8	12	14	14	12	7	12
	50	7.76923	0.856303			7	5	3	14	5	11	3	12	3	6	7	11	15	3	9	3	5	6	21	6	10	7	6	11	7	6
	60	5.30769	0.660464			5	2	2	11	5	7	3	6	2	4	6	5	13	2	5	2	2	4	15	5	9	4	4	4	5	6
	70	4.03846	0.556032			3	3	1	11	5	5	2	3	2	5	2	2	8	1	2	2	2	4	11	2	4	2	5	5	4	9
	80	3.34615	0.447015			4	1	1	7	5	2	2	2	2	4	2	3	8	1	1	3	2	6	8	1	4	2	5	1	3	7
	90	3.03846	0.386227			6	1	1	4	4	2	2	2	3	1	1	2	9	1	2	3	3	6	5	2	3	2	4	1	4	5
	100	2.73077	0.431661			6	1	1	3	5	1	0	2	1	2	1	2	7	1	2	5	2	7	3	2	2	1	8	1	3	2
	110	2.42308	0.380983			2	1	2	2	4	1	0	1	0	1	1	2	4	1	1	6	2	7	3	6	2	1	6	2	3	2
	120	2.11538	0.373453			2	1	2	2	4	1	0	1	0	1	1	2	3	1	1	4	2	8	2	3	2	1	7	2	0	2
	130	1.80769	0.30894			1	1	2	2	3	1	0	1	0	2	1	1	1	1	1	4	2	5	2	2	3	1	7	2	0	1
	140	1.57692	0.289153			1	1	2	2	2	1	0	1	0	1	1	1	1	2	1	1	2	6	2	0	2	1	6	2	0	2
	150	1.5	0.230384			1	1	2	4	2	2	0	1	0	0	1	2	1	1	1	1	2	4	2	0	2	2	4	2	0	1
	160	1.42308	0.24914			1	1	2	5	2	2	0	1	0	0	2	2	1	2	1	1	0	1	1	0	1	3	3	4	0	1
	170	1.23077	0.24997			1	1	2	5	0	2	0	1	0	0	1	2	1	3	1	1	0	0	1	0	1	2	2	4	0	1
	180	1.23077	0.310373			0	0	2	6	0	2	0	0	0	0	1	1	1	3	1	1	0	0	2	0	1	3	2	5	0	1
	190	1.26923	0.409719			0	0	2	9	0	2	0	0	0	0	1	1	1	2	1	1	0	0	1	0	1	5	0	5	0	1
	200	1.42308	0.471244			0	0	4	10	0	1	0	0	0	0	1	1	1	1	2	1	0	0	1	0	1	7	0	4	0	2
	210	1.26923	0.472498			0	0	3	11	0	0	0	0	0	0	1	1	2	0	2	0	0	0	2	0	1	5	0	4	0	1
	220	1.07692	0.379972			0	0	4	8	0	0	0	0	0	0	1	2	1	0	0	0	0	0	2	0	1	4	0	4	0	1
	230	0.769231	0.284511			0	0	0	4	0	0	0	0	0	0	1	1	2	0	0	0	0	0	2	0	1	2	0	6	0	1
	240	0.423077	0.201327			0	0	0	3	0	0	0	0	0	0	0	0	2	0	0	0	0	0	1	0	0	0	0	4	0	1
	250	0.269231	0.130769			0	0	0	2	0	0	0	0	0	0	0	0	2	0	0	0	0	0	0	0	0	0	0	2	0	1
	NDEL1 shRNA + NDEL1 WT resi
	Radius	Mean	SEM	N
	0	1	0	31		1	1	1	1	1	1	1	1	1	1	1	1	1	1	1	1	1	1	1	1	1	1	1	1	1	1	1	1	1	1	1
	10	8.80645	0.661408			9	3	8	10	10	9	12	8	13	7	2	9	9	15	10	5	17	17	5	7	7	4	5	5	8	10	7	11	8	13	10
	20	16.7742	0.831774			13	29	13	24	11	19	17	13	17	14	12	17	25	19	20	23	23	19	16	20	17	12	14	15	16	10	10	19	13	16	14
	30	18.2903	0.880119			16	24	20	26	13	21	20	9	21	12	19	15	19	24	17	23	15	15	28	20	22	16	27	19	19	14	8	17	14	20	14
	40	16	0.903994			18	25	19	17	18	12	16	10	20	12	13	15	19	19	9	16	14	10	23	24	21	17	24	17	15	8	5	12	13	13	22
	50	13.2903	0.907784			16	24	16	10	15	10	14	6	20	13	14	10	15	9	8	15	6	9	15	22	22	20	17	10	20	8	8	8	12	9	11
	60	10.871	0.885659			10	21	15	10	12	10	10	5	20	8	10	8	13	5	6	10	8	1	19	17	13	16	18	8	16	7	4	7	11	9	10
	70	7.83871	0.718566			8	12	16	3	5	8	9	4	14	5	7	7	11	5	7	7	8	2	10	12	14	13	15	4	10	6	1	5	3	5	7
	80	5.96774	0.609043			6	7	13	2	4	3	5	3	6	8	4	9	5	2	4	4	11	4	8	10	9	12	14	2	6	4	1	3	5	5	6
	90	4.51613	0.427221			3	3	8	2	2	2	5	3	4	6	5	4	5	2	3	4	6	6	7	5	6	9	12	2	5	3	1	2	4	6	5
	100	3.3871	0.352189			1	2	6	1	2	1	3	2	2	5	4	3	4	2	2	4	3	6	8	3	7	7	6	2	4	2	1	2	2	4	4
	110	2.77419	0.277119			1	2	3	2	2	1	2	2	1	5	2	4	3	3	2	4	3	2	5	3	7	4	6	1	3	1	1	1	4	3	3
	120	2.41935	0.277369			1	2	2	1	4	1	2	2	1	2	2	2	2	3	3	5	3	1	2	7	5	2	5	0	2	1	1	1	4	3	3
	130	2.51613	0.281589			2	2	2	3	1	3	4	2	1	1	2	3	3	2	5	4	3	2	2	6	3	3	4	0	1	1	1	1	7	3	1
	140	2.6129	0.320206			2	2	2	5	1	3	6	2	1	1	2	3	3	1	7	2	3	3	3	5	3	3	3	0	1	1	1	1	7	3	1
	150	2.67742	0.312421			2	2	2	4	1	4	4	2	1	2	3	3	3	2	7	2	4	2	2	4	2	6	1	0	1	1	1	3	7	4	1
	160	3.16129	0.39102			1	2	2	3	2	5	4	6	1	2	3	1	3	2	7	3	4	1	4	5	7	3	1	0	4	1	1	5	9	5	1
	170	2.70968	0.338223			1	2	2	2	2	4	6	5	2	2	3	1	3	2	6	1	3	1	4	4	2	1	1	0	5	1	1	4	8	4	1
	180	2.51613	0.317487			1	3	2	2	3	5	4	5	2	2	6	0	1	4	3	0	4	2	3	4	2	2	0	0	4	1	1	2	6	4	0
	190	2.77419	0.367232			1	2	4	3	4	5	3	7	2	1	5	0	1	3	2	0	6	5	3	7	3	1	0	0	4	1	3	2	4	4	0
	200	2.45161	0.358727			1	2	3	3	4	7	3	5	2	0	5	0	0	1	2	0	4	3	1	6	3	1	0	0	4	1	4	2	5	4	0
	210	2.03226	0.478537			2	2	4	2	0	7	3	4	1	0	13	0	0	0	2	0	1	2	0	5	2	0	0	0	3	1	2	2	3	2	0
	220	1	0.20739			3	1	4	0	0	0	2	2	0	0	3	0	0	0	1	0	1	2	0	2	2	0	0	0	1	1	1	3	1	1	0
	230	0.935484	0.240678			4	4	4	0	0	0	2	3	0	0	1	0	0	0	0	0	1	0	0	1	1	0	0	0	0	1	2	3	1	1	0
	240	0.806452	0.255769			5	5	3	0	0	0	0	2	0	0	1	0	0	0	0	0	1	0	0	1	0	0	0	0	0	1	2	3	1	0	0
	250	0.83871	0.337915			6	8	3	0	0	0	0	2	0	0	0	0	0	0	0	0	0	0	0	1	0	0	0	0	0	1	2	3	0	0	0
	NDEL1 shRNA + NDEL1 332/336A resi
	Radius	Mean	SEM	N
	0	1	0	33		1	1	1	1	1	1	1	1	1	1	1	1	1	1	1	1	1	1	1	1	1	1	1	1	1	1	1	1	1	1	1	1	1
	10	7.42424	0.617041			7	12	6	7	7	8	7	4	4	3	8	6	5	5	3	3	3	6	11	7	7	9	10	8	8	7	10	15	8	20	5	10	6
	20	13.697	0.556444			11	15	10	12	10	15	16	12	14	12	16	9	19	12	8	11	17	11	15	11	12	11	16	18	14	11	15	14	12	17	18	16	22
	30	14.4848	0.679964			16	7	12	19	16	10	19	13	13	18	15	16	11	14	15	10	16	12	14	10	6	14	12	19	14	10	13	18	22	19	18	15	22
	40	12.0303	0.780303			9	4	14	19	8	12	16	7	9	15	15	8	12	9	14	8	14	15	7	8	4	14	9	18	14	8	8	19	19	17	15	10	19
	50	9.27273	0.784887			4	4	5	17	6	2	14	1	8	13	10	8	10	7	12	7	10	14	5	4	5	10	9	14	10	14	6	16	13	13	14	4	17
	60	6.75758	0.633698			4	3	2	15	4	1	10	1	10	9	6	6	8	4	6	6	8	12	4	2	3	9	6	10	9	7	4	12	10	9	9	2	12
	70	4.81818	0.487446			4	3	2	10	3	2	6	1	8	5	5	5	5	4	4	4	8	6	1	2	2	6	4	5	5	2	2	9	9	6	8	1	12
	80	3.57576	0.328652			3	2	4	8	2	2	3	1	5	1	5	4	3	3	5	3	5	4	2	1	2	4	5	4	3	2	2	7	7	3	5	1	7
	90	3.06061	0.264501			3	2	2	6	1	3	2	2	4	1	3	4	2	3	7	2	6	3	3	1	2	5	5	2	3	1	2	4	4	3	4	2	4
	100	3	0.257464			2	2	2	4	1	1	5	3	3	1	5	6	2	2	5	2	6	2	4	1	3	4	5	2	3	2	2	2	5	3	3	2	4
	110	2.57576	0.271884			3	2	1	4	1	1	1	2	2	1	7	4	2	2	5	2	4	1	4	2	1	4	1	2	4	2	1	1	5	2	3	3	5
	120	2.27273	0.239447			3	2	1	2	1	1	1	4	3	1	6	3	3	1	3	4	3	1	2	2	1	2	1	1	4	1	1	1	5	1	4	3	3
	130	2.48485	0.25791			2	2	1	2	1	1	1	4	4	1	6	2	3	2	2	5	5	1	3	5	1	2	1	2	4	1	1	1	4	2	3	3	4
	140	2.48485	0.323104			1	2	1	2	2	1	1	4	4	1	6	1	4	2	3	5	5	1	1	7	1	1	1	1	7	3	1	1	3	2	2	1	4
	150	2.48485	0.391968			1	2	1	1	3	1	2	1	5	1	3	1	3	3	2	8	3	1	0	8	1	1	0	1	7	3	1	2	7	2	2	0	5
	160	2.24242	0.369352			1	2	1	1	1	1	4	1	4	1	4	1	2	3	0	5	3	1	0	9	1	2	0	1	8	3	1	2	2	2	2	0	5
	170	2.27273	0.435787			2	1	2	1	1	2	5	2	2	1	2	0	2	3	0	3	3	1	0	7	0	2	0	1	12	5	1	1	0	3	4	0	6
	180	2.21212	0.421392			4	1	2	2	2	1	6	2	1	1	2	0	1	3	0	3	4	1	0	5	0	2	0	1	10	6	1	1	0	2	1	0	8
	190	1.93939	0.468596			5	1	2	1	1	0	8	2	0	1	1	0	0	3	0	2	2	1	0	6	0	1	0	1	11	7	1	1	0	0	1	0	5
	200	1.66667	0.407474			6	1	2	1	0	0	8	2	0	1	1	0	0	3	0	1	2	1	0	6	0	0	0	1	6	7	1	1	0	0	0	0	4
	210	1.45454	0.437561			13	1	2	1	0	0	6	2	0	1	1	0	0	2	0	1	0	2	0	2	0	0	0	2	4	4	2	1	0	0	0	0	1
	220	0.969697	0.219697			5	2	2	2	0	0	3	0	0	1	0	0	0	1	0	1	0	2	0	2	0	0	0	3	1	2	3	1	0	0	0	0	1
	230	0.909091	0.231774			5	3	1	2	0	0	3	0	0	1	0	0	0	1	0	1	0	3	0	1	0	0	0	3	0	1	3	2	0	0	0	0	0
	240	0.69697	0.20172			2	4	3	1	0	0	2	0	0	1	0	0	0	0	0	0	0	3	0	0	0	0	0	2	0	1	3	1	0	0	0	0	0
	250	0.575758	0.222036			0	6	2	1	0	0	1	0	0	1	0	0	0	0	0	0	0	3	0	0	0	0	0	1	0	1	3	0	0	0	0	0	0

## Sheet: Fig 3C-D arbor length branches
	Figure 3C-D. Neuronal arborization analysis for knockdown and rescue groups
		Scrambled shRNA							NDEL1 shRNA							NDEL1 shRNA + NDEL1 WT resi							NDEL1 shRNA + NDEL1 332/336A resi
	Number of values	43							26							31							33
		total length	number of branches	apical dendrites length	basal dendrites length	number of apical branches	number of basal branches		total length	number of branches	apical dendrites length	basal dendrites length	number of apical branches	number of basal branches		total length	number of branches	apical dendrites length	basal dendrites length	number of apical branches	number of basal branches		total length	number of branches	apical dendrites length	basal dendrites length	number of apical branches	number of basal branches
	Mean	2182	73.49	1008	1175	28.6	44.37		1296	61.22	683.1	613.1	29.04	31.19		2149	96.19	1127	1008	46.32	48.1		1660	64	916.7	745.5	30.03	32.33
	Std. Deviation	408.3	13.4	278.8	272.5	8.864	10.01		445.7	21.18	239.2	256.6	10.76	11.99		494.7	28.64	355.3	254.8	18.89	15.49		483.5	16.68	295.6	279.9	10.9	10.55
	Std. Error	62.26	2.044	42.51	41.56	1.352	1.527		85.78	4.077	46.03	49.38	2.072	2.308		88.86	5.143	63.82	45.76	3.392	2.783		84.16	2.903	51.46	48.72	1.898	1.837
	Lower 95% CI	2056	69.36	922	1091	25.88	41.29		1119	52.84	588.5	511.6	24.78	26.44		1968	85.69	996.5	914.6	39.39	42.41		1489	58.09	811.9	646.2	26.16	28.59
	Upper 95% CI	2308	77.61	1094	1258	31.33	47.45		1472	69.6	777.8	714.6	33.3	35.93		2330	106.7	1257	1102	53.25	53.78		1832	69.91	1022	844.7	33.9	36.08
		2515.5	73	1281.97	1233.53	32	41		1121.08	52	670.696	450.386	28	24		1496.68	54	893.496	602.8	26	26		2254.6	81	1110.43	1145.54	34	44
		1992.4	67	885.05	1107.35	27	40		939.945	49	527.194	412.751	28	21		1201.43	43	831.802	369.628	29	14		2806.85	101	1904.19	906.011	65	34
		2142.4	57	948.321	1194.08	19	38		1033.72	47	638.246	394.747	24	21		2290.91	84	1501.11	789.796	54	30		1845.91	66	1211.65	634.263	43	23
		2294.48	72	924.821	1369.66	28	44		2404.48	84	1315.85	1088.62	41	43		3223.94	156	1976.58	1247.36	88	68		1717.89	43	972.929	744.962	21	22
		2190.89	59	1242.26	948.627	26	33		1123.5	41	600.446	523.052	19	22		2490.2	76	1087.61	1402.59	27	49		1983.89	84	1050.51	934.789	41	36
		2692.5	96	1751.1	945.401	64	26		1419.43	70	808.61	611.002	34	34		1907.88	91	1091.58	816.303	47	44		2098.46	86	991.713	1106.75	37	49
		2228	76	1316.46	911.541	31	45		569.276	27	355.826	215.498	13	11		1628.96	73	853.827	775.131	39	34		1271.65	75	519.281	754.983	28	45
		2204.7	72	947.492	1257.21	27	45		997.428	40	397.702	599.726	11	29		2133.9	97	1214.98	918.921	54	43		2644.24	97	1426.63	1219.11	41	53
		2187.97	78	961.616	1228.6	37	40		818.324	55	433.178	385.307	27	26		2272.34	91	1228.37	1043.97	36	55		1698.65	59	804.611	897.952	19	37
		2382.03	71	1317.29	1064.75	33	38		1274.89	59	498.275	776.615	33	26		2511.17	79	1162.12	1355.2	29	45		1613.32	78	1096.46	518.763	50	25
		2103.18	63	866.629	1236.55	23	40		1023.96	58	512.159	511.8	30	28		3166.57	114	1880.15	1287.08	60	52		1554.24	76	1110.83	444.068	46	29
		1439.27	50	506.347	932.926	15	35		1396.08	59	606.322	789.763	23	36		1770.65	73	1003.46	767.191	44	29		1324.61	54	798.828	535.365	23	23
		2745.81	87	1492.44	1253.38	36	51		2053.05	74	891.06	1161.99	28	46		2169.68	102	1075.1	1094.58	55	47		1899.2	75	815.963	1083.24	23	52
		2600.51	78	1359.35	1240.06	32	44		1146.12	47	537.678	608.443	23	24		1605.22	75	579.162	1033.99	27	42		1067.68	59	626.67	441.01	32	27
		1991.23	91	1079.79	911.446	36	55		785.708	33	505.331	280.164	15	17		2099.15	80	1523.1	576.051	52	28		944.278	48	485.612	461.033	21	24
		2253.82	89	1176.31	1077.51	35	54		1238.35	57	735.564	502.786	25	32		1655.85	81	743.803	912.05	35	46		2133.83	66	1201.68	940.784	33	30
		2265.92	85	967.259	1298.67	29	56		908.698	57	439.263	477.105	25	27		2068.31	83	780.515	1287.79	29	54		1151.76	52	684.534	478.446	20	29
		2126.01	78	1128.77	997.248	31	47		1541.35	91	928.544	612.807	48	43		1744.74	97	762.555	982.182	37	60		1516.59	62	745.961	770.626	29	33
		2436.79	80	982.903	1453.89	32	48		2257.06	128	955.012	1309.61	48	70		2473.39	131	1266.51	1207.33	47	82		1883.22	54	1273.8	609.419	31	23
		1722.95	62	716.843	1006.11	21	41		876.678	46	545.121	331.557	31	15		2395.15	85	1175.88	1219.58	34	49		1875.5	75	1032.89	842.96	40	30
		3367.98	113	1359.87	2012.89	27	77		1565.56	78	775.258	790.305	33	45		1947.41	69	1055.92	891.926	34	33		1246.64	50	783.055	463.581	23	27
		2362.72	73	875.121	1487.6	23	50		1559.44	92	909.45	649.993	52	40		2124.72	134	1155.07	969.643	65	69		1455.49	56	668.175	789.599	27	28
		2143.28	61	996.12	1147.16	30	31		1557.16	71	1044.94	512.222	41	30		2135.74	103	690.262	1001.21	23	50		1431.94	36	759.828	672.116	17	19
		2118.28	60	1327.45	790.826	38	22		1200.17	54	549.054	651.114	15	39		1844.38	115	1105.1	739.286	68	47		1338.94	57	849.692	489.244	36	21
		1786.77	64	907.953	878.815	17	47		1002.93	62	513.052	489.876	31	31		2348.59	117	1051.1	1295.3	48	67		1342.71	46	697.916	644.79	15	31
		1899.31	56	716.43	1182.88	16	40		1366.58	47	658.14	708.437	19	28		2961.14	172	1679.88	1281.25	96	76		1826.67	59	1026.81	799.86	27	32
		2442.7	80	799.784	1642.92	31	49		1802.35	75	1092.98	708.982	39	34		2589.42	109	1375.11	1209.71	63	44		2429.95	78	987.391	1444.51	30	45
		3057.59	87	1460.61	1598.09	36	48									2050.09	82	1079.73	970.361	43	39		2236.18	81	948.883	1294.68	26	52
		1543.11	53	917.028	626.078	25	28									2775	137	1580.56	1194.44	81	56		1110.07	50	589.873	520.201	23	27
		2147.34	89	912.995	1234.35	39	50									1279.89	70	462.187	817.701	25	45		1511.69	39	1000.74	510.951	21	18
		1313.13	54	516.378	796.749	19	35									2256.08	109	1065.48	1190.6	41	68		746.453	44	410.783	335.67	17	27
		1732.5	55	882.162	850.339	21	34																1480.14	50	906.468	572.575	27	22
		2360.97	78	1294.14	1066.83	35	43																1349.18	75	756.083	593.099	25	50
		2935.13	84	1353.69	1584.04	39	44
		1811.51	77	895.134	916.372	28	49
		1779.59	63	761.815	1017.77	23	40
		2078.42	64	856.13	1222.29	19	45
		1859.77	87	711.443	1148.32	23	64
		1769.07	76	822.708	946.364	29	47
		2459.54	89	1040.57	1418.98	37	52
		2078.44	70	694.394	1384.05	16	54
		2140.23	76	614.773	1525.46	19	57
		2122.8	67	764.889	1357.91	26	41

## Sheet: Fig 3E arbor pri+sec+ter
	Figure 3E. Neuronal arborization analysis for knockdown and rescue groups - primary/secondary/tertiary dendrites
		Scrambled shRNA				NDEL1 shRNA				NDEL1 shRNA + NDEL1 WT resi				NDEL1 shRNA + NDEL1 332/336A resi
	Number of values	43				26				31				33
		number of primary dendrite	number of secondary dendrite	number of tertiary dendrite		number of primary dendrite	number of secondary dendrite	number of tertiary dendrite		number of primary dendrite	number of secondary dendrite	number of tertiary dendrite		number of primary dendrite	number of secondary dendrite	number of tertiary dendrite
	Mean	6.74419	17	12.4186		6.84615	15.2308	8.23077		7.25807	20.2903	14.9355		7.09091	15.4242	9.45454
	Std. Error	0.156417	0.406209	0.648051		0.189674	0.856303	0.933657		0.296821	0.882559	1.17769		0.20115	0.591977	0.729636
		4	14	19		7	15	7		4	11	9		8	20	10
		6	16	13		7	15	5		6	12	7		8	22	15
		7	17	8		6	15	3		6	15	15		8	18	13
		6	16	15		7	16	19		6	26	29		9	10	7
		7	15	6		8	12	4		7	17	15		8	15	13
		6	17	18		7	18	11		9	25	13		7	18	16
		7	20	13		8	6	3		8	19	9		7	17	9
		7	20	16		6	16	2		9	19	14		7	21	21
		6	16	17		6	12	8		8	18	17		7	15	7
		7	15	14		9	14	11		6	19	9		8	17	13
		6	19	7		7	17	7		6	19	18		7	15	14
		6	14	8		8	16	4		7	10	11		7	16	2
		9	17	18		8	24	4		7	22	15		7	19	12
		7	16	13		7	14	5		9	14	9		5	20	5
		6	22	16		6	10	3		5	21	14		7	14	3
		7	23	14		7	14	8		7	26	8		7	13	12
		7	14	11		7	15	4		8	18	17		5	14	8
		8	21	8		7	20	13		11	26	8		6	19	7
		8	20	14		6	27	14		9	24	13		6	12	9
		8	17	8		5	10	9		7	22	11		9	18	11
		7	19	21		8	21	9		6	17	9		7	15	6
		9	18	10		6	16	18		6	26	22		7	14	7
		7	14	8		6	12	15		6	22	22		8	9	5
		6	15	10		7	12	11		7	30	20		6	12	11
		6	14	13		5	13	6		8	25	14		6	12	6
		6	19	5		7	16	11		8	25	35		9	13	11
		6	19	17						11	20	16		9	18	13
		7	16	16						5	21	11		6	17	14
		7	15	6						9	24	25		6	14	8
		8	16	15						6	15	9		5	12	5
		6	16	6						8	21	19		8	8	6
		5	14	9										6	16	5
		5	10	18										8	16	8
		7	16	18
		8	14	10
		6	19	9
		6	17	11
		7	18	10
		8	20	9
		7	22	18
		8	17	10
		6	18	15
		7	16	14
