# Supplementary material for: Sequential phosphorylation of NDEL1 by the DYRK2-GSK3β complex is critical for neuronal morphogenesis
Source: eLife. 2019 Dec 9;8:e50850. doi: 10.7554/eLife.50850 (PMC6927744; doi:10.7554/eLife.50850)
Supplement: Figure 3—source data 2. [file elife-50850-fig3-data2.xlsx]

## Sheet: Fig 3G arbor sholl
	Figure 3G. Neuronal arborization analysis for NDEL1 and kinases over-expression groups - sholl analysis
	Control + hDYRK2 + hGSK3β S9A
	Radius	Mean	SEM	N
	0	1	0	24		1	1	1	1	1	1	1	1	1	1	1	1	1	1	1	1	1	1	1	1	1	1	1	1
	10	8.75	0.887208			2	9	5	6	6	8	5	10	12	6	8	7	7	6	11	7	5	20	14	15	7	12	17	5
	20	16.75	1.06023			9	19	9	11	15	19	15	13	16	13	26	17	16	18	17	21	18	20	28	20	14	13	26	9
	30	15.5	0.809813			14	15	16	11	12	24	19	16	15	10	17	12	15	16	13	17	21	14	20	12	23	12	19	9
	40	12.1667	0.669378			15	11	14	14	10	21	11	15	15	13	12	6	9	9	12	10	16	7	14	13	11	14	12	8
	50	8.29167	0.6182			13	9	9	11	9	13	10	7	5	11	4	7	3	7	8	6	15	4	7	9	5	10	9	8
	60	5.83333	0.406766			8	6	6	7	5	8	10	6	3	9	3	6	6	5	6	4	6	1	6	4	5	6	6	8
	70	4.45833	0.421261			7	5	6	4	8	6	5	4	4	6	2	7	2	3	3	1	5	1	6	4	4	7	6	1
	80	3.91667	0.407878			4	4	4	1	2	8	5	5	2	7	1	4	2	4	2	3	6	2	6	4	6	6	5	1
	90	3.16667	0.349257			4	4	2	2	5	3	2	1	6	6	5	1	3	1	3	2	2	3	4	2	7	3	4	1
	100	3.125	0.342161			3	7	2	3	2	6	2	1	6	5	1	2	4	1	4	2	2	2	4	2	4	4	4	2
	110	3.375	0.513628			2	5	2	1	1	5	6	1	6	2	2	2	2	1	3	4	2	4	12	1	6	3	3	5
	120	3.5	0.32969			2	5	2	2	1	5	4	1	5	3	4	2	3	3	4	5	2	6	5	2	7	3	3	5
	130	3.91667	0.64245			2	6	4	2	1	11	1	1	3	1	4	3	3	1	4	4	4	6	4	2	9	13	2	3
	140	3.75	0.590535			4	2	4	3	1	10	1	1	3	1	4	1	3	1	10	8	4	4	5	1	4	9	1	5
	150	2.91667	0.365727			4	2	4	3	2	2	2	2	2	2	2	2	5	1	2	9	3	2	4	4	2	5	0	4
	160	2.45833	0.446318			4	0	6	2	3	0	3	2	0	3	0	2	2	1	2	8	1	4	2	7	1	2	0	4
	170	2.16667	0.527046			6	0	7	2	4	0	7	2	0	3	0	2	0	1	1	4	0	2	0	8	0	0	0	3
	180	2.25	0.542572			7	0	5	5	3	0	9	5	0	5	0	2	0	2	0	2	0	1	0	4	0	0	0	4
	190	1.70833	0.483343			3	0	2	4	5	0	9	5	0	3	0	4	0	3	0	0	0	1	0	2	0	0	0	0
	200	1.875	0.593786			1	0	1	7	8	0	7	5	0	4	0	8	0	3	0	0	0	1	0	0	0	0	0	0
	210	1.70833	0.559759			0	0	1	4	6	0	6	3	0	8	0	8	0	4	0	0	0	1	0	0	0	0	0	0
	220	1.04167	0.419105			0	0	1	4	2	0	1	0	0	7	0	4	0	6	0	0	0	0	0	0	0	0	0	0
	230	0.541667	0.240615			0	0	0	3	2	0	0	0	0	3	0	1	0	4	0	0	0	0	0	0	0	0	0	0
	240	0.208333	0.120072			0	0	0	2	0	0	0	0	0	0	0	1	0	2	0	0	0	0	0	0	0	0	0	0
	250	0.0833333	0.0576303			0	0	0	1	0	0	0	0	0	0	0	0	0	1	0	0	0	0	0	0	0	0	0	0
	NDEL1 WT + hDYRK2 + hGSK3β S9A
	Radius	Mean	SEM	N
	0	1	0	35		1	1	1	1	1	1	1	1	1	1	1	1	1	1	1	1	1	1	1	1	1	1	1	1	1	1	1	1	1	1	1	1	1	1	1
	10	8.65714	0.520089			5	4	11	4	13	12	8	13	12	6	9	8	13	6	11	10	13	7	8	11	7	8	8	5	10	14	8	9	8	3	5	5	6	12	11
	20	18.7143	0.829672			15	12	19	16	17	21	17	24	15	21	9	17	20	13	33	14	24	17	21	21	24	31	20	21	20	18	19	19	19	15	22	14	15	20	12
	30	19.1429	0.606883			17	15	16	16	22	17	19	25	16	15	14	18	16	21	24	17	26	23	22	18	22	17	21	23	22	25	17	20	22	15	20	22	20	12	15
	40	16.7714	0.960642			18	11	15	17	19	16	7	22	18	15	12	10	20	14	13	12	24	25	23	14	34	10	20	19	22	26	15	16	11	13	22	14	17	8	15
	50	13.8571	0.653552			17	10	10	17	19	17	6	14	17	9	12	7	12	12	13	13	13	16	17	9	19	17	18	16	15	23	12	12	10	18	14	10	13	10	18
	60	11.1429	0.680018			15	16	5	14	8	8	7	15	8	7	6	5	19	9	8	12	10	14	17	8	15	8	18	9	10	16	9	16	7	12	9	12	12	9	17
	70	8.02857	0.549233			13	6	4	10	4	6	5	10	8	10	2	5	7	11	3	14	8	10	8	4	7	5	10	7	11	14	6	10	9	10	6	12	6	6	14
	80	5.94286	0.458244			7	5	4	8	2	5	7	10	8	3	4	3	6	9	4	6	7	5	6	4	1	2	8	5	10	10	5	7	5	5	7	3	5	8	14
	90	5.68571	0.513304			5	5	3	7	3	3	5	5	9	5	4	3	3	14	8	4	6	9	4	2	3	4	6	4	8	11	5	6	7	4	5	5	1	9	14
	100	4.2	0.363919			3	2	3	7	1	3	6	4	8	6	3	2	2	3	6	5	2	8	3	3	4	2	8	5	8	8	5	4	5	4	4	2	1	5	2
	110	4.22857	0.443602			1	2	3	7	1	3	5	4	9	7	3	2	1	3	6	3	1	5	2	2	13	2	5	7	7	6	6	6	4	6	4	2	2	5	3
	120	5.08571	0.40867			1	3	7	6	4	6	5	5	9	8	2	6	1	3	7	4	3	5	3	1	6	2	10	10	4	4	7	6	4	5	8	4	6	5	8
	130	5.05714	0.498642			2	4	9	4	8	6	2	8	6	8	1	6	1	3	5	4	3	3	3	1	6	2	10	8	3	2	5	7	4	3	9	9	2	8	12
	140	4.28571	0.402871			4	5	7	4	5	8	0	9	5	6	2	5	5	4	4	2	2	1	3	3	3	5	11	3	3	1	4	5	4	3	6	6	1	3	8
	150	3.94286	0.364249			3	6	6	5	5	7	0	7	5	5	3	5	4	4	6	0	4	2	1	7	3	3	9	3	1	1	4	6	5	2	4	5	1	3	3
	160	3.45714	0.355846			3	4	6	4	5	4	0	8	3	4	2	6	2	6	7	0	2	4	0	5	2	4	8	1	0	1	3	3	4	3	3	4	4	3	3
	170	3.37143	0.437882			1	2	7	3	8	4	0	5	2	3	2	10	4	8	5	0	2	3	0	5	1	4	4	0	0	0	5	5	3	2	3	4	8	3	2
	180	2.97143	0.4006			2	2	6	2	5	5	0	6	3	2	2	9	7	4	4	0	3	4	0	6	1	3	4	0	0	0	5	3	3	2	1	1	7	1	1
	190	2.62857	0.434027			1	8	9	2	2	2	0	6	4	1	4	5	6	6	2	0	5	4	0	4	0	1	6	0	0	0	5	2	3	1	1	0	2	0	0
	200	1.57143	0.320938			1	4	6	2	1	1	0	5	0	0	2	3	5	1	0	0	5	5	0	2	0	0	4	0	0	0	2	0	3	1	1	0	1	0	0
	210	1.2	0.286386			0	4	3	2	0	0	0	2	0	0	4	4	3	0	0	0	5	5	0	3	0	0	2	0	0	0	1	0	3	0	0	0	1	0	0
	220	0.971429	0.267216			0	3	1	1	0	0	0	2	0	0	4	4	2	0	0	0	5	4	0	3	0	0	0	0	0	0	1	0	4	0	0	0	0	0	0
	230	0.742857	0.240248			0	2	0	0	0	0	0	1	0	0	4	1	4	0	0	0	4	4	0	3	0	0	0	0	0	0	0	0	3	0	0	0	0	0	0
	240	0.485714	0.189521			0	2	0	0	0	0	0	0	0	0	3	0	2	0	0	0	1	1	0	4	0	0	0	0	0	0	0	0	4	0	0	0	0	0	0
	250	0.314286	0.182289			0	2	0	0	0	0	0	0	0	0	6	0	1	0	0	0	0	1	0	1	0	0	0	0	0	0	0	0	0	0	0	0	0	0	0
	NDEL1 Ala + hDYRK2 + hGSK3β S9A
	Radius	Mean	SEM	N
	0	1	0	35		1	1	1	1	1	1	1	1	1	1	1	1	1	1	1	1	1	1	1	1	1	1	1	1	1	1	1	1	1	1	1	1	1	1	1
	10	8.45714	0.559626			9	8	6	8	11	5	13	9	12	7	11	8	4	7	15	5	5	8	12	6	5	6	10	12	10	16	7	8	8	5	11	8	2	14	5
	20	16.2286	0.716065			13	16	11	19	13	13	20	21	23	12	17	17	20	20	12	18	13	14	20	25	27	15	19	13	16	18	16	11	14	13	17	19	8	12	13
	30	15.1714	0.760899			8	9	15	12	16	11	18	11	16	13	12	18	18	30	12	17	20	23	19	15	19	15	19	11	14	18	12	7	17	12	15	15	10	16	18
	40	12.6	0.653626			6	6	9	8	17	15	14	9	12	9	14	15	11	22	9	17	21	18	16	14	16	11	12	12	9	15	10	14	10	9	15	9	14	13	10
	50	9.48571	0.71405			6	3	8	6	8	12	12	6	7	7	6	11	9	18	5	10	23	11	14	16	14	9	12	9	4	12	3	9	11	4	9	11	9	10	8
	60	7.05714	0.539129			7	1	10	3	10	10	8	11	6	6	4	10	6	12	3	6	9	10	11	8	10	3	12	7	3	7	2	5	8	3	3	10	5	7	11
	70	5.45714	0.494241			5	2	13	4	5	8	2	6	7	7	5	6	9	7	9	3	6	6	12	5	9	3	9	7	3	3	1	3	6	1	2	5	4	2	6
	80	4.54286	0.424745			2	5	9	7	3	9	3	4	5	8	2	3	7	9	2	5	4	5	5	6	7	3	5	3	2	1	1	3	9	1	2	8	3	3	5
	90	3.77143	0.338275			4	4	6	4	2	4	4	2	6	4	3	3	8	9	4	8	5	2	2	7	5	4	3	3	1	1	2	3	4	1	4	3	3	2	2
	100	3.37143	0.301497			3	4	5	2	2	6	4	3	3	3	2	2	8	9	3	3	4	4	4	2	5	3	3	3	1	1	2	4	3	2	3	3	6	1	2
	110	3.17143	0.358535			3	3	2	5	3	3	10	2	2	4	1	1	6	7	2	1	3	7	7	1	4	3	1	1	3	2	2	5	4	2	3	2	3	1	2
	120	3.48571	0.444143			3	2	1	2	4	3	3	7	1	7	4	1	4	5	2	4	2	6	11	3	2	4	0	1	4	2	2	7	11	4	3	0	1	2	4
	130	3.42857	0.542769			2	2	5	1	1	3	1	1	2	8	3	1	3	7	1	5	3	3	10	2	1	7	0	6	5	3	3	5	16	3	2	0	2	1	2
	140	3.08571	0.383201			1	0	6	0	3	3	1	1	1	5	6	2	4	6	1	5	6	4	8	1	1	6	0	1	4	4	4	4	7	3	3	0	4	1	2
	150	2.68571	0.459761			1	0	3	0	2	2	0	1	1	2	13	3	0	4	1	3	1	3	5	2	0	4	0	2	1	4	9	3	4	3	6	0	6	2	3
	160	2.28571	0.336995			1	0	4	0	2	2	0	2	0	6	7	3	0	3	1	1	1	2	4	3	0	2	0	3	1	5	6	3	2	3	4	0	6	1	2
	170	1.57143	0.278911			1	0	2	0	0	1	0	1	0	2	5	3	0	3	1	2	1	1	2	4	0	0	0	3	0	7	4	1	2	2	2	0	3	1	1
	180	1.91429	0.426775			1	0	2	0	0	1	0	2	0	2	6	7	0	10	1	1	1	0	3	3	0	0	0	2	0	9	4	1	2	3	2	0	2	1	1
	190	1.8	0.390647			0	0	1	0	0	1	0	1	0	2	5	9	0	5	3	0	5	0	1	7	0	0	0	4	0	4	5	1	2	2	2	0	1	1	1
	200	1.45714	0.360538			0	0	0	0	0	1	0	1	0	3	3	5	0	6	9	0	4	0	0	5	0	0	0	2	0	3	2	1	1	2	1	0	0	1	1
	210	0.971429	0.251			0	0	0	0	0	0	0	0	0	2	2	5	0	2	3	0	2	0	0	5	0	0	0	1	0	4	1	0	0	2	1	0	0	1	3
	220	0.742857	0.202268			0	0	0	0	0	0	0	0	0	1	3	3	0	0	2	0	3	0	0	2	0	0	0	1	0	3	0	0	0	1	1	0	0	2	4
	230	0.628571	0.228571			0	0	0	0	0	0	0	0	0	1	1	2	0	0	0	0	4	0	0	1	0	0	0	2	0	3	0	0	0	0	0	0	0	2	6
	240	0.6	0.243228			0	0	0	0	0	0	0	0	0	0	0	3	0	0	0	0	4	0	0	0	0	0	0	2	0	3	0	0	0	0	0	0	0	3	6
	250	0.342857	0.192038			0	0	0	0	0	0	0	0	0	0	0	1	0	0	0	0	1	0	0	0	0	0	0	0	0	1	0	0	0	0	0	0	0	3	6

## Sheet: Fig 3H-I arbor length branches
	Figure 3H-I. Neuronal arborization analysis for NDEL1 and kinases over-expression groups
		Control + hDYRK2 + hGSK3β S9A							NDEL1 WT + hDYRK2 + hGSK3β S9A							NDEL1 Ala + hDYRK2 + hGSK3β S9A
	Number of values	24							35							35
		total length	number of branches	apical dendrites length	basal dendrites length	number of apical branches	number of basal branches		total length	number of branches	apical dendrites length	basal dendrites length	number of apical branches	number of basal branches		total length	number of branches	apical dendrites length	basal dendrites length	number of apical branches	number of basal branches
	Mean	1852	106	1106	746.5	61.04	42.5		2404	128.6	1335	1069	69.2	56.94		1893	99.46	1119	775.5	54.2	43.17
	Std. Deviation	242.9	22.37	225	162.5	14.84	13.81		375.4	25.47	289.6	275.1	17.71	19.42		426	22.55	294.7	219.5	17.1	11.79
	Std. Error	49.57	4.567	45.94	33.18	3.029	2.819		63.46	4.305	48.94	46.51	2.994	3.283		72.01	3.811	49.81	37.1	2.89	1.993
	Lower 95% CI	1750	96.55	1011	677.8	54.78	36.67		2275	119.9	1236	974.7	63.11	50.27		1747	91.71	1018	700.1	48.33	39.12
	Upper 95% CI	1955	115.4	1201	815.1	67.31	48.33		2533	137.3	1435	1164	75.29	63.61		2040	107.2	1220	850.9	60.07	47.22
		1794.81	88	1105.01	686.296	48	35		2273.47	107	1156.68	1116.79	58	49		1267.91	85	689.89	578.016	53	32
		2162.7	56	1229.85	932.844	36	20		2320.02	128	1333.32	986.703	73	55		1532.63	99	1056.66	475.819	62	34
		1770.03	87	891.82	882.202	42	38		2591.55	156	1766.52	825.036	109	47		1160.42	74	596.08	564.344	26	48
		1813.28	81	1088.91	724.369	46	35		2566.56	137	1435.46	1131.1	85	52		1038.81	56	634.808	403.999	31	25
		1803.47	106	1362.67	440.654	79	23		3075.43	171	1436.76	1652.26	83	65		1891.01	114	1296.95	620.86	67	31
		1822.25	104	1174.06	650.601	64	30		2686.09	121	1644.64	1038.41	75	44		1507.4	85	1054.94	452.464	56	29
		2230.16	143	1227.21	1002.95	76	67		2213.79	107	1320.99	893.38	62	42		1573.04	102	906.826	666.209	44	58
		2397.38	127	1685.75	711.631	91	36		2110.09	74	1438.9	670.6	46	27		1896.62	127	973.674	921.864	65	57
		1691.46	89	946.261	745.195	48	41		2312.95	102	1701.01	611.939	76	26		1480.63	84	835.099	645.975	40	43
		1580.53	81	832.125	748.402	39	42		2450.49	147	1734.63	715.859	120	27		1800.13	86	1042.61	755.605	42	40
		2116.08	103	1308.07	805.765	62	38		2380.32	107	1621.19	757.587	76	29		1698.54	63	1056.26	642.281	28	35
		1595.73	106	725.545	870.183	51	55		2539.14	152	1339.31	1201.07	69	80		2379.33	126	1668.79	708.976	88	36
		1659.42	97	1117.2	542.22	69	28		1787.4	115	1013.45	773.947	70	45		1527.86	68	916.796	611.066	39	29
		1357.98	98	746.857	611.12	54	44		2456.09	116	1238.9	1217.19	56	60		1972.81	89	1022.06	950.246	40	47
		1722.52	94	1174.02	548.504	63	31		2345.88	130	1285.2	1055.75	76	51		1861.27	93	1082.56	778.707	48	45
		1733.51	105	913.378	824.08	57	43		1669.77	118	826.034	843.739	61	57		1953.07	122	1260.93	694.393	80	39
		2061.87	129	1215.81	846.068	69	60		3383.52	203	1987.88	1400.62	108	83		2197.29	106	1239.58	957.709	49	57
		1822.03	126	1249.64	570.797	85	38		2719.39	159	1215.82	1504.71	61	86		1889.71	94	1228.24	661.474	60	34
		1530.96	94	942.624	588.335	55	39		2684.42	131	1545.09	1139.34	82	49		2846.28	136	1728.92	1117.35	78	58
		2158.08	156	1180.98	975.592	77	67		1991.11	119	822.712	1166.68	39	78		1626.93	91	1066.46	560.466	56	35
		1920.9	123	1124.68	792.094	70	49		2141.1	126	1133.6	1007.5	60	66		1748.25	77	801.55	946.703	37	40
		1952.08	117	1361.73	590.354	76	41		2589.59	173	960.965	1627.22	54	113		2500.06	119	1139.45	1360.61	44	75
		1876.64	102	1130.97	743.814	55	45		1888.74	122	969.947	918.789	62	60		1915.22	98	1094.19	820.976	48	43
		1882.95	132	799.821	1080.74	53	75		3278.71	167	1918.08	1360.63	80	87		1939.67	93	924.545	1018.65	41	46
									2218.55	131	1273.66	944.636	63	61		2008.52	69	1241.64	766.886	45	24
									2442.82	119	1453.86	987.422	71	46		2651.87	154	1620.33	1031.54	89	65
									2727.96	135	1080.58	1645.73	50	84		2275.37	119	1109.45	1166.28	53	59
									2410.52	113	1416.13	994.386	57	56		1841.19	88	956.822	884.368	42	46
									2405.59	110	1204.99	1200.87	55	52		1579.87	88	913.411	671.931	43	41
									2393.09	128	1190.77	1202.32	68	60		1663.12	105	792.877	870.243	52	53
									1945.94	102	1046.91	896.847	54	46		2233.16	101	1409.15	822.501	56	42
									2075.06	110	1229.55	845.507	62	48		2834.8	135	1749.12	1086.02	76	54
									2610.27	129	1272.01	1338.26	55	74		1726.56	94	1187.77	538.795	57	37
									2453.39	139	1611.85	840.664	89	48		1981.08	127	1313.97	667.107	88	39
									2013.08	97	1104.53	908.545	57	40		2272.03	114	1547.87	723.102	74	35

## Sheet: Fig 3J arbor pri+sec+ter
	Figure 3J. Neuronal arborization analysis for NDEL1 and kinases over-expression groups - primary/secondary/tertiary dendrites
		Control + hDYRK2 + hGSK3β S9A				NDEL1 WT + hDYRK2 + hGSK3β S9A				NDEL1 Ala + hDYRK2 + hGSK3β S9A
	Number of values	24				35				35
		number of primary dendrite	number of secondary dendrite	number of tertiary dendrite		number of primary dendrite	number of secondary dendrite	number of tertiary dendrite		number of primary dendrite	number of secondary dendrite	number of tertiary dendrite
	Mean	6	21.125	21.0833		6.34286	25.2286	25.9429		5.97143	21.4	16.6
	Std. Error	0.199637	0.697596	1.22018		0.196365	0.809695	1.13385		0.171429	0.825232	1.15315
		5	16	16		9	24	20		5	18	17
		5	14	9		6	29	23		5	21	17
		6	20	16		7	31	31		7	20	4
		6	20	14		6	25	25		6	14	8
		4	21	19		5	26	35		5	23	19
		5	20	19		7	32	23		5	19	11
		6	27	26		7	22	19		8	22	16
		6	27	26		4	18	15		6	33	16
		6	18	18		5	16	29		7	21	11
		6	19	20		8	38	23		6	14	17
		6	21	19		5	19	25		6	17	9
		9	24	19		8	25	34		7	22	21
		6	20	22		8	25	19		6	16	10
		7	23	12		7	26	20		6	23	13
		5	21	16		6	26	25		6	17	21
		6	20	20		6	24	24		6	24	19
		7	20	32		6	34	43		7	24	12
		5	20	26		8	26	36		5	18	21
		6	17	20		5	25	26		5	25	39
		6	28	30		5	16	32		3	20	19
		7	21	30		7	27	24		6	21	12
		6	24	27		7	29	35		8	31	17
		7	21	22		7	27	15		6	22	18
		6	25	28		8	27	41		7	17	13
						5	17	27		5	18	8
						6	26	24		6	28	32
						6	23	31		6	21	22
						6	21	27		5	16	20
						7	24	23		8	23	12
						6	29	27		6	26	17
						5	25	19		5	17	22
						5	26	24		6	34	20
						7	28	20		6	26	11
						6	27	24		6	18	12
						6	20	20		6	20	25
