# Supplementary material for: Sequential phosphorylation of NDEL1 by the DYRK2-GSK3β complex is critical for neuronal morphogenesis
Source: eLife. 2019 Dec 9;8:e50850. doi: 10.7554/eLife.50850 (PMC6927744; doi:10.7554/eLife.50850)
Supplement: Figure 5—source data 1. [file elife-50850-fig5-data1.xlsx]

## Sheet: Fig 5A-C axon-dendrite assay
	Figure 5A-C. Axon/dendrite outgrowth analysis for NDEL1 WT/Ala and TARA over-expression groups
		Control					NDEL1 WT + hTARA WT					NDEL1 332/336A + hTARA WT
	Number of values	173					91					107
		total length	the longest neurite length	axonal length	dendritic length		total length	the longest neurite length	axonal length	dendritic length		total length	the longest neurite length	axonal length	dendritic length
	Mean	1984	636.7	1460	523.8		2896	769.7	2261	635.2		2158	623.8	1724	434
	Std. Deviation	852.5	279.8	736.6	297.8		1145	327.1	1013	399.4		852.4	255.3	790.1	223.4
	Std. Error	64.81	21.28	56	22.64		120	34.29	106.2	41.86		82.4	24.68	76.39	21.59
	Lower 95% CI	1856	594.7	1349	479.1		2658	701.6	2050	552		1995	574.8	1572	391.2
	Upper 95% CI	2112	678.7	1570	568.5		3135	837.8	2472	718.4		2321	672.7	1875	476.9
		588.097	205.889	274.426	313.671		3048.82	649.371	2367.72	681.104		2729.57	874.402	2393.03	336.541
		1538.93	694.956	1358.99	179.939		3797.7	472.32	3168.76	628.944		2397.99	906.667	2105.11	292.882
		1808.33	542.866	1518.25	290.078		4172.23	909.591	1983.04	2189.19		2558.64	376.487	2087.63	471.004
		1073.99	390.697	937.488	136.503		2029.47	778.708	1788.86	240.617		1733.73	389.164	1487.94	245.79
		1355.3	556.125	1035.13	320.168		2121.65	312.56	1792.11	329.537		1933.91	607.665	1622.84	311.067
		584.085	166.79	363.105	220.98		3247.43	1215.44	2655.1	592.325		1468.04	432.108	1032.73	435.312
		3388.03	506.911	2338.89	1049.13		3357.05	697.899	2898.44	458.615		2778.15	976.337	2200.54	577.608
		2462.66	878.238	1556.55	906.106		4857.17	525.014	4143.51	713.655		1190.66	483.175	913.815	276.848
		2187.55	469.007	1499.55	688.005		3203.22	839.49	1472.98	1730.24		3696.09	902.805	3464.5	231.584
		594.458	249.585	435.109	159.349		2305.15	584.538	1838.42	466.725		2256.94	473.914	1656.14	600.799
		3521.99	583.424	2495.05	1026.94		1783.22	532.259	1568.17	215.047		1671.55	455.472	1218.57	452.978
		2135.55	951.407	1800.65	334.893		1906.07	430.792	1211.85	694.215		3831.92	860.869	3509.64	322.28
		950.988	379.155	491.859	459.128		2672.48	681.278	2035.63	636.852		2603.09	344.304	2296.27	306.824
		3785	667.872	3437.19	347.81		5036.65	751.889	4471.94	564.718		1780.48	435.974	1575.27	205.216
		3380.58	686.685	2224.67	1155.92		4282.99	711.822	3436.6	846.387		2488.69	592.024	2050.96	437.731
		1444.79	484.247	1096.76	348.024		5053.18	607.119	4328.23	724.955		2398.94	474.58	2152.27	246.672
		3190.28	674.803	2786.74	403.534		2828.98	728.399	2042.58	786.405		3292.15	569.13	2912.47	379.679
		737.174	229.581	382.739	354.435		4156.18	904.766	3424.16	732.022		2330.55	562.401	2002.96	327.585
		3118.86	492.329	2491.13	627.729		2636.62	707.764	2313.32	323.297		3499.66	1043.43	3041.92	457.741
		3014.51	569.547	2591.91	422.598		3380.81	925.195	2757.55	623.263		2374.85	481.312	2132.58	242.274
		1817.17	380.969	1477.53	339.649		2666.92	1277.03	2165.99	500.921		2050.74	399.619	1854.7	196.033
		3624.28	1411.41	3194.52	429.757		2681.56	1163.02	1860.88	820.68		3381.09	442.613	2940.27	440.824
		2753.94	598.623	2239.24	514.696		3649.86	1181.19	3290.13	359.734		4184.65	1493.45	3376.99	807.659
		2124.71	352.836	1554.49	570.217		2082.19	428.512	1676.11	406.084		4130.69	523.077	3437.44	693.25
		1860.44	549.454	1477.08	383.365		3932.89	1015.03	3102.72	830.167		1437.71	406.738	1002.76	434.954
		2113.14	503.606	1676.35	436.791		3451.88	573.484	2962.25	489.633		3178.89	639.814	2879.93	298.962
		1955.83	889.444	1703.25	252.583		4170.46	1459	3403.43	767.031		3197.02	1437.52	2754.49	442.533
		1315.47	324.621	823.966	491.51		2783.25	572.371	2353.54	429.706		3232.43	595.338	2828.63	403.794
		1349.55	692.96	1092.74	256.81		3812.43	896.401	3346.8	465.628		4186.84	1178.92	3401.85	784.991
		740.558	389.14	579.258	161.3		2503.04	803.552	1867.03	636.006		1893.2	664.515	1596.83	296.371
		1802.71	419.584	1137.85	664.865		3617.57	909.153	3095.15	522.419		2480.36	574.845	1822.74	657.614
		2096.26	976.93	1748.13	348.123		5824.64	1669.12	4890.16	934.487		2755.85	704.755	2604.49	151.359
		2241.05	359.334	1596.16	644.894		3661.48	766.146	1785.4	1876.07		1850.17	707.592	1338.66	511.509
		2425.86	825.56	1820.86	605.005		3854.63	729.998	2787.68	1066.95		756.212	396.276	507.035	249.177
		3874.44	1751.05	2947.99	926.445		6312.88	1551.85	5354.78	958.095		2077.57	1177.01	1994.07	83.5043
		1668.06	372.238	708.259	959.801		3475.02	926.968	2820.47	654.553		838.232	430.464	552.31	285.923
		4022.54	1245.37	3120.18	902.357		4991.85	1395.64	4199.88	791.97		2401.26	791.529	2257.72	143.54
		2131.93	652.779	1689.59	442.336		2184.04	772.212	1759.63	424.409		3186.59	830.007	2213.41	973.179
		4418.82	1196.25	3769.99	648.826		832.175	231.774	300.076	532.099		599.218	330.195	419.202	180.016
		1837.89	953.855	1523.58	314.303		4513.82	1316.96	4045.38	468.45		2135.86	576.815	1623.76	512.1
		2838.49	1223.15	2362.34	476.144		3316.46	1138.55	1773.79	1542.67		2165.62	343.652	1845.7	319.917
		1111	457.542	852.113	258.888		2220.68	836.81	1989.92	230.75		1657.02	318.509	1245.64	411.387
		1336.56	558.585	900.17	436.385		2411.73	606.228	1963.47	448.263		1232.93	608.221	1040.07	192.858
		1678.47	710.993	1245.49	432.978		2327.54	616.51	1961.47	366.067		1192.7	245.958	624.307	568.393
		3740.91	799.387	3227.42	513.487		3035.92	1233.33	2534.02	501.901		768.226	209.919	249.71	518.516
		825.788	330.828	471.802	353.986		2184.97	560.864	1919.95	265.021		1742.86	799.802	1569.99	172.871
		2048.79	946.576	1758.46	290.332		775.898	139.507	197.157	578.742		2169.14	541.704	1408.85	760.292
		1366.45	385.037	721.907	644.548		1695.17	541.403	1612.03	83.141		2310.81	762.723	1699.95	610.859
		1088.91	442.784	886.597	202.318		2568.38	480.924	1424.26	1144.13		2508.99	651.466	2063.59	445.403
		1586.5	548.033	1222.58	363.919		1338.06	378.977	1050.03	288.028		1502.51	569.22	1258.57	243.941
		1500.13	582.479	1257.8	242.34		3625.06	1292.23	3162.55	462.518		1834.26	548.081	1492.42	341.847
		1882.37	818.211	1588.3	294.066		3820.19	659.853	3339.42	480.77		1949.99	659.903	1707.57	242.413
		3415.64	1668.54	2487.75	927.897		2417.83	758.271	2104.13	313.696		3393.89	827.117	2639.15	754.748
		2520.47	675.802	2070.85	449.62		780.888	330.721	631.285	149.604		2257.27	823.281	2152.37	104.905
		3146.3	696.615	1589.16	1557.14		2351.64	1049.78	1796.23	555.403		854.33	276.644	318.433	535.897
		3685.39	628.436	3068.62	616.77		3031.05	420.579	2702.61	328.438		1234.47	638.249	1061.65	172.813
		1489.67	282.712	799.003	690.671		1634.45	344.827	1211.92	422.532		1652.44	522.161	1568.63	83.8137
		2236.73	904.414	1780.7	456.031		2973.07	454.458	1607.75	1365.31		3019.03	831.473	1776.72	1242.3
		1337.96	485.694	760.841	577.121		1885.98	476.675	1376.61	509.378		2125.31	702.413	1690.82	434.482
		3910.81	1238.26	3406.4	504.409		3042.29	1138.84	2421.82	620.467		664.719	177.562	212.935	451.784
		655.512	225.579	447.294	208.218		4775.41	1148.95	3529.73	1245.68		2102.06	545.812	901.317	1200.74
		1009.02	331.119	500.071	508.953		1716.27	478.339	1212.97	503.292		1925.25	499.17	1420.52	504.731
		2330.31	700.521	1787.89	542.423		1370.07	329.841	1114.96	255.109		2749.3	889.007	2186.11	563.189
		1259.05	478.679	807.339	451.715		2111.01	750.869	1881.48	229.529		1379.73	444.67	1013.64	366.088
		1984.37	640.505	1710.3	274.066		3654.13	681.277	2993.84	660.286		1962.96	700.826	1675.68	287.282
		1204.13	203.84	719.842	484.291		2125.28	684.895	1455.91	669.367		1072.59	262.993	657.931	414.657
		2796.66	892.157	1235.71	1560.96		1325.75	679.965	1068.19	257.559		1062.43	270.321	321.535	740.892
		1830.16	796.174	1355.76	474.405		1006.83	479.576	797.719	209.113		1486.72	469.673	1164.33	322.386
		813.888	355.904	578.42	235.467		2208.78	436.72	1633.43	575.353		1640.42	589.907	1189.43	450.99
		1906.8	610.497	1416.25	490.55		2549.12	675.864	2237.62	311.495		2923.84	831.18	2307.22	616.626
		1354.03	592.742	1213.57	140.461		1863.82	1146.93	1497.05	366.764		1631.58	708.182	1275.28	356.306
		1588.25	888.81	1544.89	43.3523		3025.85	1220.78	2631.27	394.576		1576.59	471.571	1196.38	380.204
		1501.92	580.018	689.966	811.953		3273.81	1071.08	2489.95	783.856		2837.45	706.726	2408.75	428.702
		1211.08	320.938	673.979	537.103		2411.9	574.569	1192.38	1219.53		2192.43	514.819	1574.31	618.121
		2462.93	665.734	1790.39	672.536		2297.31	990.507	2066.83	230.485		2540.05	843.26	1871.74	668.306
		1033.69	253.511	694.599	339.089		4035.92	1091.42	2658.79	1377.13		2562.48	726.429	2195.47	367.005
		1958.38	791.846	1664.67	293.71		2195.04	932.593	1988.18	206.862		659.353	229.878	371.879	287.475
		1864.71	863.973	1428.36	436.352		2037.24	583.818	1542.61	494.631		1758.47	558.628	1436.14	322.328
		2464.48	538.844	1692.19	772.289		1732.91	361.961	1467.93	264.985		809.12	252.692	545.832	263.287
		2057.22	637.096	1647.37	409.853		2410.92	467.388	2024.97	385.946		1952.03	441.847	1324.63	627.399
		1098.64	623.595	841.97	256.671		1604.17	580.407	1411.84	192.323		1824.89	926.663	1515.18	309.71
		2272.47	1135.56	1967.76	304.708		2228.41	570.4	1119.51	1108.9		1809.14	591.321	1572.67	236.467
		1410.64	585.391	784.862	625.781		2856.95	900.455	2591.12	265.829		2799.07	934.774	2382.96	416.111
		1041.71	341.567	803.157	238.549		2842.24	596.456	2036.27	805.972		2481.16	594.279	2090.91	390.251
		2221.6	985.132	1671.99	549.61		2284.28	547.321	1882.35	401.928		2519.49	499.829	1628.79	890.697
		1526.96	656.681	1209.8	317.159		2072.19	430.839	1434.68	637.509		2715.16	592.504	2265.1	450.06
		1427.31	691.386	1063.99	363.324		3501.38	728.671	2322.47	1178.92		1220.95	368.093	899.597	321.358
		1844.58	431.608	1223.82	620.756		3034.95	1091.12	1928.23	1106.71		4407.61	650.667	3574.88	832.734
		1774.91	809.519	1429.25	345.663		5685.51	1530.7	4695.73	989.781		1357.3	529.229	1247.32	109.985
		1112.59	680.37	882.443	230.143		3516.39	733.718	2145.38	1371.01		3081.83	874.861	2718.61	363.222
		974.37	369.553	481.932	492.438		1494.53	482.212	1161.77	332.759		1555	431.945	1204.57	350.433
		1600.58	463.895	762.476	838.104							1899.93	1251.63	1546.23	353.709
		3268.94	1004.59	2832.61	436.333							1930.88	425.492	1211.27	719.609
		1217.28	319.737	787.224	430.057							1040.4	264.762	598.98	441.424
		1651.1	644.421	1187.81	437.523							2281.47	911.41	1912.14	369.332
		2319.33	896.799	1679.98	639.348							2212.54	576.715	1748.38	464.159
		1579.91	459.001	1119.4	460.515							1639.47	650.179	922.654	716.821
		3305.78	1001.36	2621.03	684.749							2901.2	1252.18	2494.87	406.321
		2039.63	713.498	1615.25	424.375							3341.62	754.657	2600.61	741.012
		1528.11	716.157	1122.51	405.601							2847.09	698.94	2145.13	701.962
		1360.76	823.209	981.718	379.046							3322.01	654.471	2409	913.004
		1110.91	462.463	610.165	500.742							1847.33	644.17	1498.26	349.078
		2369.87	515.015	1733.07	636.794							695.025	312.493	466.19	228.835
		1437.28	310.186	899.341	537.94							1757.68	571.322	1417.38	340.299
		3390.7	492.38	1525.45	1865.25							2140.25	798.142	1627.35	512.9
		1583.53	270.48	466.191	1117.34							1808.33	747.664	1506.16	302.171
		3016.97	764.847	2323.51	693.46							1427.44	674.915	1317.84	109.606
		1006.48	518.796	639.897	366.579
		1172.36	385.618	710.067	462.29
		1565.25	608.97	1061.62	503.629
		828.538	408.356	455.275	373.263
		2520.61	996.819	2022.56	498.054
		1814.93	1061.27	1522.53	292.406
		2310.28	792.867	1830.31	479.965
		2746.7	776.75	2256.35	490.346
		1517.81	509.242	1229.69	288.119
		1573.3	599.517	1201.02	372.286
		2419.71	719.5	1188.01	1231.7
		1395.56	334.719	748.813	646.743
		982.048	484.339	596.895	385.154
		2423.72	848.068	1819.75	603.968
		1044.96	336.952	667.082	377.876
		1674.27	323.221	828.115	846.15
		1118.28	468.125	852.82	265.462
		2606.88	795.234	1946	660.878
		2532.79	532.446	1723.08	809.711
		3532.2	878.293	2923.64	608.561
		1886.03	426.125	918.798	967.229
		1801.26	819.214	1331.34	469.915
		757.301	286.293	446.708	310.593
		1038.97	314.332	857.393	181.573
		1840.13	450.589	1584.67	255.452
		2150.91	813.274	1693.6	457.31
		1515.33	544.118	1226.65	288.679
		1431.33	378.051	1126.99	304.335
		2242.98	873.198	1137.87	1105.11
		1686.12	487.977	1200.26	485.866
		1303.02	438.303	1090.64	212.373
		3559.09	1103.78	2648.79	910.299
		2898.92	828.695	1849.76	1049.16
		2289.26	1166.85	1783.47	505.786
		2029.96	670.589	1721.53	308.431
		1660.51	560.204	1225.73	434.773
		1068.93	337.286	713.338	355.588
		1970.18	643.753	940.057	1030.13
		1470.72	498.128	854.767	615.954
		1105.84	325.256	918.016	187.821
		2521.71	1018.25	2250.68	271.037
		1281.07	285.924	749.323	531.745
		3410.45	654.704	2519.13	891.326
		3015.72	636.898	2394.78	620.937
		3716.8	1000.05	3189.6	527.199
		3159.99	648.147	1287.73	1872.26
		1102.88	539.154	847.412	255.465
		2977.17	1361.98	2459.17	518.001
		1451.53	698.182	1079.32	372.213
		892.331	278.611	511.087	381.244
		935.721	626.557	765.333	170.388
		3116.79	830.6	2271.95	844.848
		2081.17	367.544	1611.37	469.795
		2700.26	514.507	1908.95	791.313
		2768.07	466.567	2247.54	520.538
		2484.09	871.553	1803.68	680.41
		884.501	255.711	522.434	362.067
		1254.93	548.238	956.351	298.581
		3108.62	765.869	2240.82	867.8
		1656.42	639.722	1352.54	303.881
		2381.18	841.081	2034.41	346.763
		2255.57	628.459	1722.68	532.889
		2779.91	1069.49	2091.08	688.823
		2007.39	694.649	1676.49	330.892
		1940.66	520.517	1510.93	429.725
		2258.68	887.317	1372.96	885.721

## Sheet: Fig 5D-F axon-dendrite assay
	Figure 5D-F. Axon/dendrite outgrowth analysis for NDEL1 and TARA WT/del over-expression groups
		Control					NDEL1 WT +hTARA WT					NDEL1 WT + hTARA Δ413-499
	Number of values	214					124					139
		total legnth	the longest neurite length	axonal length	dendritic length		total length	the longest neurite length	axonal length	dendritic length		total length	the longest neurite length	axonal length	dendritic length
	Mean	1730	606.4	1272	457.6		3045	905.4	2410	634.4		2529	778.3	1908	621.2
	Std. Deviation	857.7	288.9	754.5	220.5		1141	331.8	979.3	358.8		1012	288.1	889.5	373.7
	Std. Error	58.63	19.75	51.57	15.08		102.4	29.79	87.94	32.22		85.81	24.43	75.45	31.7
	Lower 95% CI	1614	567.5	1171	427.9		2842	846.4	2236	570.6		2360	730	1759	558.5
	Upper 95% CI	1846	645.4	1374	487.3		3247	964.4	2584	698.1		2699	826.7	2057	683.8
		2850.09	691.649	2417.21	432.88		3665.81	941.585	1889.41	1776.4		2440.48	378.039	2003.03	437.458
		3990.1	1291.54	3356.49	633.614		3056.69	678.052	2463.46	593.227		2974.02	620.823	1608.32	1365.7
		2738.12	923.443	2319.05	419.073		2014.31	1036.27	1722.42	291.895		3943.34	818.748	1759.41	2183.94
		1089.35	317.163	766.359	322.994		1666.92	796.837	1357.12	309.802		3208.96	1390.76	2417.83	791.132
		753.811	120.393	326.987	426.824		2870.46	1107.54	2072.95	797.509		2464.66	623.266	1562.06	902.6
		2058.44	624.593	1671.53	386.911		1972.51	944.489	1584.14	388.368		2538.36	735.071	1517.06	1021.3
		1529.27	471.536	1341.66	187.604		2423.18	674.277	2090.31	332.866		1218.18	463.567	845.308	372.873
		1774.24	637.932	1311.9	462.337		3135.78	895.165	2766.25	369.527		3201.78	1057.41	2313.7	888.085
		1375.95	675.134	995.177	380.777		4201.91	813.923	3258.13	943.783		2211.75	909.377	2057.45	154.295
		1402.55	325.845	1149.97	252.583		2776.09	956.034	1644.37	1131.72		2532.12	948.591	1707.6	824.524
		3673.43	524.236	2067.66	1605.77		2142.03	972.861	1787.53	354.504		1534.38	839.203	1253.29	281.081
		1729.24	649.071	1343.86	385.375		2696.03	693.876	2312.56	383.467		2781.98	668.872	2495.39	286.588
		1654.14	299.274	1011.73	642.403		3377.15	675.622	2698.84	678.311		3137.58	451.811	924.173	2213.41
		1527.12	565.863	1164.02	363.102		3491.67	1116.53	2381.47	1110.2		4318.62	665.142	3067.41	1251.21
		1318.26	432.944	732.332	585.927		4354.12	1144.51	3490.39	863.733		2216.96	1057.12	1732.57	484.389
		2458.35	962.35	2271.57	186.778		3813.58	634.165	2718.07	1095.52		2459.85	540.542	1432.82	1027.03
		2215.5	1230.34	1870.34	345.154		4549.25	1259.88	3923.19	626.063		4263.12	1036.92	3397.01	866.119
		2747.59	628.359	1941.22	806.367		1446.28	382.713	1145.92	300.364		2053.17	530.166	1779.47	273.707
		3080.3	750.64	2145.23	935.069		2000.33	502.987	1708.03	292.301		3644.23	919.979	2831.14	813.092
		2905.83	798.324	2162.13	743.698		5077.33	1213.21	4264.26	813.071		1845.27	714.924	1493.81	351.468
		2431.15	700.89	1533.15	897.997		3047.99	592.65	2189.36	858.628		2658.18	758.687	2096.44	561.734
		3636.82	997.075	2903.48	733.335		1781	349.572	1296.76	484.24		2330.84	633.202	1805.27	525.562
		4382.9	1161.71	3564.81	818.092		2280.59	584.779	1766.31	514.283		5083.53	1136.58	4281.55	801.988
		2272.31	686.866	1556.97	715.345		3324.86	746.264	2735.55	589.306		2191.89	524.652	1314.45	877.444
		764.298	278.925	400.797	363.501		6106.83	973.83	4516.52	1590.31		2005.32	739.738	1325.8	679.516
		1541.33	444.11	624.158	917.172		4133.47	1557.42	3221.99	911.479		1815.25	807.301	980.686	834.564
		1489.11	507.777	1031.59	457.512		5069.93	1184.07	3274.06	1795.87		908.697	385.471	659.813	248.884
		2142.91	638.234	1484.83	658.079		1888.37	880.497	1636.69	251.67		3125.55	987.128	2257.97	867.583
		2871.49	898.885	2534.11	337.385		2180.07	1118.48	1568.87	611.196		1043.71	357.229	829.999	213.708
		3172.55	871.855	2449.47	723.087		1671.79	453.141	1341.99	329.795		1425.18	365.416	1054.71	370.469
		4253.15	815.386	3773.57	479.579		1955.87	420.006	1262.86	693.017		3661.12	566.227	2953.67	707.444
		807.886	225.143	586.733	221.153		2327.48	1412.32	2108.13	219.344		1454.59	326.9	990.476	464.113
		1783.54	442.223	1385.71	397.824		1397.21	436.552	1114.09	283.118		2081.53	691.788	1508.68	572.854
		4366.15	968.958	3305.04	1061.1		2428.37	1011.08	2151.28	277.087		5267.47	1460.66	4296.44	971.029
		3368.94	881.668	2650.01	718.932		1988.81	789.127	1470.22	518.589		2746.12	619.218	2172.42	573.704
		3252.16	573.827	2030.01	1222.15		3192.39	552.332	2429.7	762.691		1343.24	651.407	1028.92	314.317
		1008.24	468.17	723.326	284.913		3019.31	1535.92	2617.59	401.719		2123.74	713.578	1231.15	892.587
		1097.4	330.333	577.293	520.104		2743.82	752.667	2340.88	402.937		3122.8	631.663	1898.08	1224.71
		2534.2	672.294	1786.11	748.085		2548.87	667.938	1242.32	1306.55		2856.45	1031.57	2215.74	640.712
		2776.47	826.79	2283.49	492.982		1550.29	567.723	1039.81	510.481		3366.62	1566.93	2990.03	376.592
		5215.91	1316.21	4342.34	873.569		2551.84	619.849	2254.59	297.254		1501.68	644.015	1059.52	442.155
		1881.88	531.722	1333.61	548.272		1732.33	602.242	1633.37	98.9653		1294.28	301.831	639.803	654.473
		2979.97	714.881	2542.66	437.316		2509.33	1298.93	1901.07	608.265		1466.12	395.176	1115.88	350.24
		1244.93	474.784	856.249	388.679		3433.85	1005.51	2077.77	1356.08		2589.92	667.825	2266.72	323.198
		724.597	258.649	514.312	210.285		3645.32	1170.14	3193.79	451.53		3821.11	1208.94	2924.81	896.303
		846.675	252.211	497.394	349.281		2317.5	962.905	1767.24	550.265		3310.71	1102	2618.33	692.379
		976.914	193.861	319.771	657.143		3219.43	877.91	2441.18	778.251		1389.47	524.615	1199.03	190.438
		1550.99	997.449	1374.76	176.236		2274.45	914.051	1930.44	344.008		2828.53	577.308	2489.91	338.62
		1818.06	1094.77	1472.01	346.05		1551.66	661.087	1193.25	358.411		4464.42	653.525	3355.96	1108.46
		2187.85	589.391	1916.83	271.023		1875.17	989.239	1356.84	518.334		2485.81	653.385	2024.28	461.535
		1607.1	460.146	977.416	629.683		5531.44	1093.93	3444.37	2087.07		2317.73	681.938	1480.19	837.547
		1513.72	576.101	1301.49	212.232		1994.65	680.802	1635.88	358.778		2699.43	1027.95	2020.28	679.144
		867.607	263.641	316.358	551.249		3567.19	1275.85	3265.22	301.968		1681.07	480.953	838.407	842.667
		575.901	218.036	251.756	324.145		1780.88	463.478	837.515	943.363		2074.91	432.893	1748.21	326.699
		590.571	163	296.713	293.857		1375.5	630.402	1187.66	187.841		1845.88	852.11	1169.78	676.105
		584.171	243.035	287.825	296.346		3206.22	952.338	2509.92	696.3		3406.07	1143.19	2722.02	684.049
		873.098	425.612	594.537	278.561		1035.89	469.36	678.131	357.763		4486.06	1145.54	3072.63	1413.43
		1868.98	798.032	1329.96	539.024		4591.19	1543.14	4002.5	588.688		2907.81	943.992	1502.04	1405.77
		1017.02	388.193	776.705	240.315		2803.43	1481.06	2356.16	447.266		1995	1001.54	1424.2	570.803
		1105.05	706.191	932.443	172.608		1537.17	503.739	1218.54	318.632		2414.66	1176.9	1956.99	457.666
		1268.62	467.668	808.594	460.025		5579.18	1278.62	4999.68	579.499		3324.15	922.601	1820.45	1503.7
		1179.13	386.476	888.02	291.106		2705.16	578.493	2357.18	347.977		2034.34	979.328	1633.94	400.401
		1356.61	715.582	1110.83	245.78		1557.52	753.281	1258.65	298.867		1491.75	341.733	1182.5	309.255
		978.751	377.228	682.933	295.818		1724.8	546.273	1050.77	674.033		905.157	329.725	601.973	303.184
		1728.79	294.871	1511.19	217.604		3260.88	1494.96	2575.53	685.345		4495.18	1279.17	4176.36	318.813
		1982.46	625.868	1399.04	583.422		3726.14	549.262	3250.9	475.246		2731.2	416.619	2135.97	595.236
		1159.97	270.742	868.044	291.924		2153.03	634.151	1681.38	471.653		1269.25	590.152	1032.44	236.811
		1564.82	950	1242.25	322.568		2869.26	767.529	1826.92	1042.34		1486.92	282.807	1209.29	277.631
		2047.14	513.702	1594.11	453.032		2733.9	874.154	2159.04	574.865		2599.03	776.289	1542.18	1056.84
		889.018	375.325	609.951	279.067		2844.68	662.542	2014.73	829.955		3055.7	956.06	1473.81	1581.89
		3521.63	1194.36	3111.39	410.232		1566.33	594.601	1295.75	270.579		2847.75	426.231	2144.41	703.337
		1724.36	598.015	1117.41	606.95		3929.23	1373.92	3391.7	537.533		1785.36	540.608	1484.83	300.532
		1182.86	388.503	756.168	426.689		2803.39	760.824	1627.89	1175.5		2276.82	912.783	1641.13	635.689
		1042.05	517.886	698.306	343.743		1770.37	936.623	1546.22	224.144		2604.39	770.949	2393.1	211.289
		1075.84	309.535	460.569	615.268		3894.02	1791.1	3390.78	503.244		2138.36	563.86	1976.71	161.648
		1586.59	405.405	1256.23	330.359		3823.67	1111.05	3395.53	428.131		2015.42	1143.49	1713.93	301.491
		3981.36	771.31	2974.16	1007.21		4221.44	897.575	3968.27	253.175		2983.89	1083.44	2690.46	293.425
		1318.67	786.941	927.29	391.378		3216.78	989.075	2549.05	667.727		725.492	239.086	649.433	76.0593
		714.438	482.317	621.709	92.7287		2907	1245.25	2467.36	439.644		693.545	367.402	449.611	243.934
		1511.29	601.268	918.767	592.519		3177.03	500.651	2243.94	933.088		4523.08	971.067	3560.57	962.514
		1242.91	588.942	965.28	277.631		5638.58	1010.14	4638.18	1000.4		3751.45	1196.93	3167.87	583.587
		1466.37	567.655	831.991	634.38		4466.64	748.149	3548.3	918.337		2305.25	621.19	1852	453.244
		1751.17	621.965	1465.77	285.405		2746.41	1077.91	2250.78	495.629		1695.11	571.109	1514.32	180.79
		891.636	262.855	626.446	265.191		5018.91	1376.99	4669.61	349.293		6917.79	1290.2	6173.97	743.827
		1743.03	510.156	1067.13	675.895		1999.12	418.227	1577.77	421.356		2396.98	655.082	1522.33	874.648
		625.459	152.098	188.458	437.001		1888.18	574.112	1522.46	365.725		3054.48	925.583	2574.36	480.117
		2667.13	790.104	2170.76	496.37		3804.76	908.349	3512.74	292.02		1140.69	587.213	786.173	354.516
		1381.88	473.65	537.517	844.358		1869.4	525.806	1645.09	224.317		1439.99	678.924	1142.05	297.94
		627.695	147.302	284.096	343.598		1991.81	663.71	1523.79	468.014		3324.07	1320.24	2753.68	570.383
		1041.78	744.803	822.405	219.377		1137.05	364.103	865.391	271.653		3296.72	921.724	2289.34	1007.38
		2184.2	1143.06	1848.76	335.443		3982.13	991.936	3620.76	361.37		2339.62	931.243	1803.01	536.603
		1885.36	479.008	1266.9	618.466		2582.59	1310.98	2116.78	465.808		1211.28	261.631	748.571	462.712
		1094.34	346.746	530.672	563.667		2319.43	851.064	1837.04	482.389		2586.49	654.45	1908.25	678.24
		1612.95	587.132	982.596	630.36		5007.16	1538.97	4218.02	789.139		2900.86	848.88	1981.14	919.714
		1562.05	466.161	1367.97	194.079		3313.06	1127.08	2828.33	484.733		3174.8	672.425	2626.6	548.208
		1968.01	725.731	1599.36	368.652		2384	1501.35	1742.04	641.959		2576.06	1098.95	1949.81	626.244
		1595.61	757.169	1050.28	545.335		5711.02	711.869	4106.35	1604.67		3025.76	980.392	2119.5	906.258
		730.69	454.623	555.531	175.159		3042.12	1214.6	2285.72	756.41		3376.05	1355.21	2658.56	717.496
		1825.78	595.386	1317.72	508.052		2320.58	593.885	1519.05	801.53		3374.25	965.972	2317.43	1056.81
		1089.38	412.172	867.588	221.79		4061.15	1334.15	3644.13	417.023		2578.23	550.261	2090.46	487.772
		453.207	262.275	312.451	140.756		3494.34	942.553	2741.17	753.172		2942.41	621.521	2248.93	693.484
		1760.72	588.526	1173.31	587.413		5347.55	1513.5	4209.82	1137.72		2833.09	1045.23	2427.76	405.334
		1121.86	364.717	436.794	685.066		3116.45	987.583	2762.69	353.756		3365.36	778.753	3136.69	228.672
		1320.11	813.516	890.499	429.613		4511.37	957.955	3547.37	964.007		1421.27	767.903	1111.19	310.078
		1019.39	296.77	627.451	391.943		2642.41	768.21	1900.82	741.591		1513.41	473.687	1119.65	393.76
		1823.17	494.34	1392.59	430.582		3089.17	483.986	2274.03	815.146		1733.02	790.862	1343.29	389.73
		2403.88	701.266	2130.64	273.246		5120.64	1739.81	4402.84	717.794		2117.58	743.391	1736.26	381.32
		2077.92	876	1568.32	509.603		3107.46	634.607	2468.16	639.298		1384.24	462.081	1032.64	351.599
		1625.49	452.418	1036.31	589.18		4798.15	725.92	3405.18	1392.97		4383.85	1089.73	3829.71	554.139
		1018.55	210.287	421.325	597.223		3403.33	953.211	2733.98	669.35		2829.73	884.769	2255.81	573.922
		1009.35	401.197	821.537	187.817		4250.64	1222.15	3732.39	518.254		1822.02	712.722	1307.45	514.565
		2479.24	829.445	1979	500.237		3696.07	800.829	3055.95	640.122		1512.83	859.457	1305.04	207.793
		678.86	224.291	313.081	365.779		1794.42	738.017	1286.87	507.549		3519.79	1086.11	3127.06	392.731
		585.992	208.239	389.141	196.851		3299.98	1496.28	2424.77	875.204		1675.04	819.512	1342.42	332.618
		2066.66	440.835	1262.31	804.351		3370.03	883.787	2776.01	594.013		3939.83	992.551	3161.59	778.235
		737.362	310.868	400.245	337.117		3181.7	673.284	2167.88	1013.82		1874.17	836.913	1228.08	646.091
		1884.41	1104.94	1685.09	199.328		3736.5	1359.76	2826.72	909.776		1574.89	377.493	1248.39	326.498
		1287.26	462.623	910.091	377.165		2777.68	560.364	1965.05	812.631		2167.62	1129.51	1862.4	305.222
		1504.65	457.589	814.91	689.745		3438.66	942.301	2660.21	778.444		1417.57	579.844	827.198	590.37
		1508.14	732.394	825.137	683		2887.35	1287.99	2484.68	402.665		1503.96	412.422	1205.08	298.886
		1399.72	576.908	1008.88	390.84		2658.17	1051.8	2063.9	594.272		2422.35	1106.22	1989.73	432.621
		1813.76	1050.79	1639.74	174.011		1844.45	503.422	1541.89	302.561		3033.86	1001.55	2337.6	696.256
		1081.83	527.483	804.53	277.302		2968.54	751.851	2573.72	394.82		1132.72	558.122	1080.47	52.2507
		1306.15	292.825	848.493	457.654		5343.15	882.67	4649.95	693.196		3087.12	862.687	2643.6	443.526
		1624.26	469.521	1026.64	597.618							2577.01	1194.28	1959.22	617.784
		832.078	204.386	363.578	468.5							2171.02	1166.42	1600.28	570.737
		1242.01	580.371	959.326	282.682							1394.15	504.855	1090.66	303.483
		1653.04	583.366	1344.57	308.473							2083.21	631.427	1385.64	697.568
		609.541	293.534	372.712	236.829							2414.56	843.933	1256.83	1157.73
		1025.16	438.81	720.987	304.169							1878.89	716.881	1256.89	621.997
		3941.11	637.823	3478.86	462.242							2428.33	779.428	2158.22	270.106
		2420.62	913.969	1848.6	572.022							4549.45	1452.88	3921.84	627.614
		767.492	345.74	544.625	222.867							2376.03	782.49	2062.45	313.575
		1128.44	460.789	843.054	285.388							2276.62	606.095	1462.2	814.418
		1342.59	553.465	800.572	542.016							3391.86	584.826	2037.66	1354.2
		1121.96	330.996	460.129	661.835							1905.44	367.251	546.612	1358.83
		1049.49	232.531	411.115	638.372							2891.12	1020.63	2484.02	407.1
		2237.73	751.148	1603.91	633.822							3131.07	975.31	2310.31	820.761
		1074.41	431.179	784.75	289.657							1889.16	647.317	1602.42	286.74
		1077.4	273.47	801.112	276.293
		2550.94	619.656	1925.68	625.259
		2409.57	940.194	1836.23	573.347
		1370.05	644.412	1104.75	265.294
		1133.71	377.821	638.226	495.486
		2037.87	935.586	1600.82	437.045
		1367.77	252.104	878.211	489.556
		1306.13	400.725	989.372	316.761
		1326.12	545.716	755.669	570.454
		4833.73	1116.95	4043.7	790.03
		2144.98	1105.39	1711.59	433.393
		2223.01	1163.66	1809.22	413.791
		1274.43	502.375	854.536	419.894
		1087.19	189.391	650.028	437.164
		3288.71	983.476	2546.21	742.497
		1612.24	759.102	1330.03	282.209
		2747.26	1753.32	2124.88	622.386
		1539.8	808.592	1171.51	368.282
		1731.37	511.212	840.616	890.754
		2473.82	856.908	2064.96	408.855
		928.749	250.013	680.492	248.257
		1367.22	521.795	1052.66	314.567
		1304.76	568.912	968.056	336.704
		2584.03	1239.02	1964.18	619.848
		2298.91	1140.61	1578.38	720.529
		1982.47	975.2	1127.84	854.629
		2608.42	754.436	2046.04	562.382
		1977.41	414.043	1510.08	467.329
		1610.23	399.714	1139.51	470.724
		2150.79	1147.08	1684.21	466.582
		2155.84	845.478	1860.16	295.687
		2196.21	1365.99	1856.08	340.122
		1167.09	435.509	830.22	336.869
		1672.25	1171.4	1403.61	268.646
		2052.72	752.084	1794.31	258.411
		2274.94	733.464	1752.37	522.566
		2023.28	915.992	1594.96	428.32
		1403.79	382.164	994.414	409.376
		576.514	224.448	417.788	158.726
		1696.26	360.7	519.423	1176.83
		1620.21	668.313	994.219	625.99
		2316.03	1000.52	1998.63	317.397
		3003.6	1182.83	2406.96	596.645
		2621.97	778.678	2085.52	536.453
		1184.95	494.455	998.792	186.162
		961.937	306.055	832.496	129.441
		953.144	407.294	808.097	145.047
		1808.73	874.883	1567.95	240.781
		2053.73	1067.02	1823.15	230.575
		1002.59	681.902	757.653	244.939
		1239.19	536.429	841.636	397.552
		2147.29	594.379	1387.1	760.189
		652.746	377.273	415.31	237.436
		1773.67	716.527	1282.42	491.252
		858.708	468.04	624.941	233.767
		948.159	494.354	725.84	222.319
		1334.56	501.853	870.005	464.551
		1281.98	391.349	721.872	560.107
		1418.1	394.66	980.467	437.637
		1486.06	700.034	1166.75	319.307
		1587.86	628.577	1104.09	483.776
		1875.08	417.634	1428.11	446.974
		2294.31	697.726	1793.06	501.249
		1759.57	385.325	1236.67	522.899
		1425.56	363.689	918.874	506.691
		2294.06	669.366	1624.39	669.667
		864.614	510.944	547.88	316.735
		1159.67	441.039	960.337	199.339
		1194.01	657.76	899.001	295.013
		1013.32	438.962	674.527	338.795
		1729.61	1109.77	1309.29	420.318
		1433.02	576.337	885.55	547.465
		2917.89	1170.87	2137.82	780.065
		655.568	339.47	417.652	237.916
		2100.63	651.65	1679.99	420.645
