# Supplementary material for: Sequential phosphorylation of NDEL1 by the DYRK2-GSK3β complex is critical for neuronal morphogenesis
Source: eLife. 2019 Dec 9;8:e50850. doi: 10.7554/eLife.50850 (PMC6927744; doi:10.7554/eLife.50850)
Supplement: Figure 5—source data 2. [file elife-50850-fig5-data2.xlsx]

## Sheet: Fig 5H arbor sholl
	Figure 5H. Neuronal arborization analysis for NDEL1 and TARA over-expression groups - sholl analysis
	Control
	Radius	Mean	SEM	N
	0	1	0	27		1	1	1	1	1	1	1	1	1	1	1	1	1	1	1	1	1	1	1	1	1	1	1	1	1	1	1
	10	7.40741	0.582898			4	8	5	9	7	9	11	10	8	8	6	2	4	2	12	10	7	16	6	7	8	9	7	5	5	6	9
	20	14.8519	0.780284			18	17	19	15	24	14	19	13	17	23	15	10	9	15	16	17	15	14	13	12	10	18	16	7	10	15	10
	30	17.4074	1.00605			16	18	17	22	22	13	21	20	20	29	25	15	7	13	18	15	24	20	16	14	9	15	23	7	17	19	15
	40	16.7407	1.22602			18	19	11	14	24	9	21	20	22	24	35	13	8	19	16	15	24	24	13	12	9	11	17	6	16	17	15
	50	14.4444	1.25102			12	17	11	14	21	8	14	15	19	30	33	14	10	18	12	12	17	24	10	10	10	8	15	6	12	8	10
	60	12.9259	1.21121			11	12	6	14	20	16	11	9	18	25	32	16	12	21	9	9	11	18	9	9	11	10	12	3	12	6	7
	70	10.2963	1.06861			6	8	2	11	12	8	13	7	19	17	29	15	10	13	7	9	9	16	9	6	13	5	7	4	10	6	7
	80	7.59259	0.862745			4	7	1	7	6	8	5	3	15	14	21	12	11	9	5	8	7	11	8	4	9	3	8	3	10	2	4
	90	5.92593	0.631387			6	4	2	6	5	8	5	2	7	10	16	10	9	10	1	7	5	7	7	3	6	3	6	2	6	2	5
	100	4.66667	0.47741			4	3	2	6	2	8	4	3	2	5	7	8	7	12	1	2	5	5	6	2	6	3	6	3	5	3	6
	110	4.11111	0.404157			6	4	3	5	2	7	3	4	1	6	6	8	6	5	0	0	5	6	6	2	6	4	3	5	2	3	3
	120	3.66667	0.39943			4	4	4	6	1	9	2	3	2	2	6	5	6	3	0	0	3	5	4	2	4	4	2	5	3	7	3
	130	3.07407	0.353758			6	3	4	5	2	7	1	5	2	2	5	2	4	2	0	0	2	4	4	1	5	4	1	2	3	5	2
	140	3.07407	0.40624			5	4	4	6	1	4	1	6	2	3	5	2	3	1	0	0	0	3	4	0	7	3	2	3	6	6	2
	150	2.22222	0.355395			5	4	3	3	1	0	2	6	2	3	5	0	3	0	0	0	0	3	3	0	3	3	1	0	5	3	2
	160	1.77778	0.338983			5	4	4	1	1	0	0	5	2	2	5	0	2	0	0	0	0	3	1	0	3	2	1	0	2	4	1
	170	1.7037	0.384214			5	4	6	1	1	0	0	6	2	2	6	0	2	0	0	0	0	2	1	0	1	1	1	0	1	3	1
	180	1.18518	0.267078			4	4	4	1	1	0	0	2	2	1	4	0	1	0	0	0	0	2	1	0	1	0	1	0	1	2	0
	190	1.07407	0.244168			3	4	4	1	1	0	0	2	2	1	3	0	1	0	0	0	0	2	0	0	1	0	1	0	1	2	0
	200	1.07407	0.276969			1	4	5	1	2	0	0	4	2	2	2	0	1	0	0	0	0	2	0	0	0	0	1	0	2	0	0
	210	0.814815	0.244815			0	4	2	0	2	0	0	0	4	3	1	0	1	0	0	0	0	1	0	0	0	0	2	0	2	0	0
	220	0.518518	0.187732			0	2	0	0	2	0	0	0	3	3	0	0	0	0	0	0	0	1	0	0	0	0	1	0	2	0	0
	230	0.37037	0.152362			0	1	0	0	2	0	0	0	2	3	0	0	0	0	0	0	0	1	0	0	0	0	1	0	0	0	0
	240	0.185185	0.107245			0	1	0	0	2	0	0	0	0	2	0	0	0	0	0	0	0	0	0	0	0	0	0	0	0	0	0
	250	0.0740741	0.0740741			0	0	0	0	0	0	0	0	0	2	0	0	0	0	0	0	0	0	0	0	0	0	0	0	0	0	0
	NDEl1 WT + mTARA WT
	Radius	Mean	SEM	N
	0	1	0	37		1	1	1	1	1	1	1	1	1	1	1	1	1	1	1	1	1	1	1	1	1	1	1	1	1	1	1	1	1	1	1	1	1	1	1	1	1
	10	6.2973	0.492991			3	9	12	12	4	5	4	7	10	5	8	7	4	11	4	5	8	8	7	1	5	4	7	10	2	3	2	10	5	1	6	4	7	9	7	7	10
	20	18.4324	1.11604			17	31	11	15	19	28	17	33	19	23	20	16	16	28	17	10	21	25	22	10	15	26	34	20	21	14	15	11	10	6	15	13	16	11	17	25	15
	30	21.7027	1.36718			25	27	13	30	24	16	13	36	20	19	15	17	28	43	18	21	15	31	17	9	22	37	33	28	23	24	23	8	15	8	14	20	22	19	14	33	23
	40	20.6486	1.20573			25	28	11	29	27	14	16	25	22	25	9	15	22	32	18	19	14	31	17	11	23	29	28	26	27	32	16	5	9	13	14	21	28	16	16	28	23
	50	19.2973	1.26566			25	34	12	28	26	12	16	25	16	26	7	13	16	31	19	24	13	35	21	13	21	22	19	19	26	26	13	5	9	16	19	10	31	9	14	26	17
	60	17.0811	1.29121			22	35	10	22	19	10	11	24	15	22	6	11	13	25	20	16	10	33	19	13	20	16	21	28	18	26	8	5	7	21	17	11	29	7	5	24	13
	70	14.1081	1.05323			21	26	8	17	13	9	11	19	10	20	5	12	7	16	22	14	10	22	10	13	15	17	15	15	15	22	5	4	4	24	18	8	27	8	9	22	9
	80	11.6216	0.904901			17	21	7	14	14	4	11	16	8	16	6	15	3	13	15	14	9	18	5	11	11	13	9	11	9	15	4	1	3	21	15	4	19	11	18	20	9
	90	8.35135	0.670279			11	11	7	8	10	4	7	14	4	14	5	9	1	10	8	13	7	7	4	10	10	10	6	10	5	10	3	1	3	15	13	4	19	7	8	13	8
	100	6.59459	0.544505			6	6	4	7	9	4	6	11	6	15	6	6	1	5	8	10	5	5	5	10	8	5	4	8	3	5	2	1	3	10	11	5	9	7	15	9	4
	110	5.59459	0.69798			2	4	2	3	8	4	4	10	6	12	4	4	3	2	7	7	5	6	8	9	7	5	3	7	2	5	2	1	2	8	9	3	5	5	25	7	1
	120	4.67568	0.413826			2	3	4	2	5	5	4	5	5	10	6	5	4	3	6	7	2	5	6	7	9	5	3	2	2	2	1	1	4	6	6	4	8	6	12	5	1
	130	4.86486	0.470068			0	2	4	2	8	6	5	8	11	9	5	5	4	5	6	5	2	6	11	8	8	4	3	2	2	2	2	1	1	6	3	5	6	8	9	4	2
	140	4.62162	0.568639			0	1	5	1	8	5	6	9	12	8	4	5	4	7	7	2	1	5	10	6	12	2	4	2	3	1	2	1	1	2	2	6	6	7	12	1	1
	150	4.54054	0.593502			0	0	8	0	5	5	6	9	11	7	4	6	6	13	5	2	1	4	9	6	10	1	7	3	2	1	5	1	1	2	3	4	2	4	13	1	1
	160	4.37838	0.5804			0	0	8	0	6	4	7	11	9	8	4	7	8	11	6	2	2	3	7	5	2	1	7	5	2	1	5	1	1	2	4	3	2	3	14	1	0
	170	4.48649	0.633904			0	0	10	0	5	4	7	9	8	6	5	7	13	11	5	2	3	3	7	5	1	0	9	6	2	2	4	1	1	2	6	2	1	3	15	1	0
	180	3.89189	0.639988			0	0	10	0	3	4	5	8	7	5	4	9	10	11	3	3	2	0	2	5	1	0	8	6	3	2	3	1	1	2	5	0	1	2	17	1	0
	190	3.37838	0.527547			0	0	9	0	3	4	5	6	6	1	2	4	8	10	2	4	4	0	0	6	0	0	7	8	3	2	2	1	1	3	6	0	2	2	12	2	0
	200	3.35135	0.786729			0	0	8	0	3	1	3	3	6	3	2	2	9	11	2	7	3	0	0	3	0	0	7	7	3	2	2	1	1	3	4	0	0	0	26	2	0
	210	2.21622	0.528661			0	0	3	0	1	0	2	1	3	0	2	1	5	9	1	7	6	0	0	2	0	0	5	1	4	2	2	1	1	2	4	0	0	0	16	1	0
	220	1.91892	0.486111			0	0	2	0	0	0	3	0	2	0	0	0	4	13	0	7	7	0	0	2	0	0	4	1	4	3	1	1	1	2	4	0	0	0	9	1	0
	230	1.62162	0.616772			0	0	1	0	0	0	2	0	0	0	0	0	1	6	0	6	6	0	0	2	0	0	0	0	3	4	0	1	1	3	3	0	0	0	21	0	0
	240	1.2973	0.434725			0	0	0	0	0	0	1	0	0	0	0	0	1	2	0	4	7	0	0	2	0	0	0	0	5	5	0	1	1	3	3	0	0	0	13	0	0
	250	1.02703	0.364503			0	0	0	0	0	0	1	0	0	0	0	0	1	1	0	1	4	0	0	1	0	0	0	0	6	5	0	2	1	2	2	0	0	0	11	0	0
	NDEL1 332/336A + mTARA WT
	Radius	Mean	SEM	N
	0	1	0	33		1	1	1	1	1	1	1	1	1	1	1	1	1	1	1	1	1	1	1	1	1	1	1	1	1	1	1	1	1	1	1	1	1
	10	5.93939	0.538199			5	4	5	6	4	7	5	3	8	9	7	6	5	14	8	6	9	5	10	6	10	1	5	2	2	1	5	4	5	4	3	13	9
	20	14.8485	0.69919			23	13	21	14	13	17	13	20	11	11	14	14	13	13	24	23	18	15	15	12	15	16	21	12	12	7	11	13	11	13	14	16	12
	30	17.0303	0.80303			22	18	20	15	10	15	12	17	16	16	11	25	14	13	23	23	18	24	16	18	25	20	23	15	14	14	12	21	13	11	17	22	9
	40	14.7273	0.872857			17	14	14	10	5	11	11	14	12	15	12	14	17	9	27	23	18	28	15	13	14	18	23	13	15	14	13	20	12	11	10	15	9
	50	12.2727	0.857534			16	13	11	7	3	7	5	11	10	13	9	14	12	9	11	19	17	25	15	10	11	16	20	13	10	8	14	24	10	10	13	13	6
	60	10.3939	0.78569			12	11	7	3	4	6	2	8	10	11	6	13	11	6	7	19	11	20	13	10	10	14	17	12	8	7	14	20	10	7	12	14	8
	70	7.9697	0.626868			7	4	7	3	2	7	2	11	9	7	11	8	11	9	5	14	6	15	7	10	6	11	9	10	4	3	9	18	8	7	9	8	6
	80	6.72727	0.60814			3	3	6	1	2	6	2	7	10	6	6	6	8	10	4	11	7	15	6	7	8	6	5	9	4	5	7	18	5	9	9	6	5
	90	5.33333	0.548183			3	4	5	1	2	5	2	5	10	3	4	5	2	7	3	8	3	15	7	6	6	5	2	7	5	3	7	12	4	11	7	4	3
	100	4.21212	0.416873			3	2	2	1	2	6	2	3	5	3	3	5	1	7	3	7	2	9	7	5	3	2	2	6	3	4	6	9	3	9	7	5	2
	110	4	0.384353			3	2	1	1	3	7	2	4	3	3	2	5	3	6	3	5	5	10	5	4	2	2	2	6	5	5	7	7	2	5	7	5	0
	120	4.18182	0.367873			2	2	3	1	5	5	2	3	5	2	5	3	6	8	3	3	6	9	4	5	4	3	9	6	6	4	4	4	2	3	5	6	0
	130	3.87879	0.383755			2	1	3	1	2	3	3	3	6	2	6	4	7	5	3	4	2	8	4	9	5	6	7	6	6	3	2	4	2	3	5	1	0
	140	3.57576	0.430887			2	1	3	2	3	3	3	2	1	3	4	6	6	3	2	8	1	8	4	4	2	8	8	6	9	2	2	3	2	1	5	1	0
	150	3.15151	0.369585			1	1	3	2	3	3	2	2	1	4	5	6	5	3	2	5	1	5	4	4	2	8	8	5	7	2	2	2	3	1	2	0	0
	160	2.36364	0.361023			0	1	1	2	3	3	3	1	1	4	2	3	3	3	2	5	1	3	4	1	2	5	8	1	9	1	1	2	1	1	1	0	0
	170	1.84848	0.343007			0	1	1	2	2	3	2	1	0	5	2	2	2	3	2	5	0	1	2	0	2	5	8	0	6	1	0	1	0	1	1	0	0
	180	1.45454	0.325934			0	2	0	2	2	2	1	1	0	7	1	0	2	3	2	5	0	0	0	0	1	5	5	0	4	2	0	1	0	0	0	0	0
	190	0.818182	0.219566			0	2	0	2	0	2	1	2	0	4	0	0	1	1	4	4	0	0	0	0	0	0	0	0	2	1	0	1	0	0	0	0	0
	200	0.636364	0.207885			0	1	0	1	0	2	0	2	0	5	0	0	0	1	4	2	0	0	0	0	0	0	0	0	1	1	0	1	0	0	0	0	0
	210	0.666667	0.315828			0	1	0	0	0	2	0	2	0	10	0	0	0	1	2	2	0	0	0	0	0	0	0	0	0	1	0	1	0	0	0	0	0
	220	0.212121	0.0843601			0	1	0	0	0	2	0	1	0	1	0	0	0	1	0	0	0	0	0	0	0	0	0	0	0	1	0	0	0	0	0	0	0
	230	0.0909091	0.0508197			0	1	0	0	0	1	0	1	0	0	0	0	0	0	0	0	0	0	0	0	0	0	0	0	0	0	0	0	0	0	0	0	0
	240	0.030303	0.030303			0	0	0	0	0	0	0	1	0	0	0	0	0	0	0	0	0	0	0	0	0	0	0	0	0	0	0	0	0	0	0	0	0
	250	0	0			0	0	0	0	0	0	0	0	0	0	0	0	0	0	0	0	0	0	0	0	0	0	0	0	0	0	0	0	0	0	0	0	0
	NDEL1 WT + mTARA Δ401-487
	Radius	Mean	SEM	N
	0	1	0	20		1	1	1	1	1	1	1	1	1	1	1	1	1	1	1	1	1	1	1	1
	10	7.05	0.678524			5	5	5	4	4	4	9	8	13	5	9	13	3	8	12	9	7	6	7	5
	20	15.75	0.858012			16	21	13	16	13	17	18	18	21	16	18	16	12	12	20	23	11	14	9	11
	30	18.35	1.11986			16	19	18	20	21	23	18	26	14	17	26	12	18	12	20	30	17	15	13	12
	40	15.9	1.273			11	21	16	16	24	20	14	19	7	15	19	10	21	9	20	29	9	13	14	11
	50	13.15	1.16591			4	15	12	15	17	18	9	21	4	14	17	11	20	11	18	19	8	8	15	7
	60	10.85	1.03942			3	12	8	12	11	12	5	15	2	10	18	11	17	9	16	15	5	8	16	12
	70	8.45	1.14587			2	4	5	12	10	8	3	10	1	8	16	8	21	7	11	14	4	5	14	6
	80	6.55	0.974612			2	3	6	7	7	6	2	3	2	5	17	7	14	5	10	11	4	5	13	2
	90	4.95	0.719923			3	5	2	4	3	6	2	3	1	3	11	10	10	4	5	9	3	2	10	3
	100	4.1	0.588933			3	8	3	3	2	5	2	2	1	3	6	9	8	4	2	6	2	2	9	2
	110	4.1	0.556777			2	6	4	5	1	5	5	2	1	3	4	7	12	4	2	5	2	4	3	5
	120	3.55	0.407011			2	6	4	5	1	3	2	3	1	4	4	5	5	3	2	7	2	6	1	5
	130	2.95	0.311828			1	2	2	6	1	3	4	4	3	4	2	4	4	3	2	2	2	5	1	4
	140	2.75	0.33931			3	2	4	7	1	2	4	4	4	3	2	2	3	3	1	1	1	3	1	4
	150	2.55	0.51542			5	1	7	7	1	0	2	4	2	6	0	1	2	2	0	1	0	4	2	4
	160	2.3	0.42981			4	0	4	6	2	0	3	2	2	6	0	1	3	2	0	1	0	4	2	4
	170	2.15	0.454654			4	0	4	6	3	0	1	1	2	6	0	1	1	2	0	1	0	5	2	4
	180	2.35	0.466087			5	0	1	5	5	0	1	2	4	6	0	2	1	2	0	1	0	4	3	5
	190	2.05	0.472813			3	0	1	4	5	0	1	2	6	7	0	1	0	2	0	1	0	3	3	2
	200	1.45	0.45			2	0	1	1	5	0	0	1	2	8	0	1	0	1	0	0	0	3	2	2
	210	1	0.307793			1	0	0	0	3	0	0	1	1	4	0	1	0	0	0	0	0	3	3	3
	220	0.6	0.210263			2	0	0	0	1	0	0	1	0	2	0	1	0	0	0	0	0	2	3	0
	230	0.3	0.179179			0	0	0	0	1	0	0	0	0	0	0	0	0	0	0	0	0	2	3	0
	240	0.25	0.175844			0	0	0	0	0	0	0	0	0	0	0	0	0	0	0	0	0	2	3	0
	250	0.25	0.175844			0	0	0	0	0	0	0	0	0	0	0	0	0	0	0	0	0	2	3	0

## Sheet: Fig 5I-J arbor length branches
	Figure 5I-J. Neuronal arborization analysis for NDEL1 and TARA over-expression groups
		Control							NDEL1 WT + mTARA WT							NDEL1 332/336A + mTARA WT							NDEL1 WT + mTARA Δ401-487
	Number of values	27							37							33							20
		total length	number of branches	apical dendrites length	basal dendrites length	number of apical branches	number of basal branches		total length	number of branches	apical dendrites length	basal dendrites length	number of apical branches	number of basal branches		total length	number of branches	apical dendrites length	basal dendrites length	number of apical branches	number of basal branches		total length	number of branches	apical dendrites length	basal dendrites length	number of apical branches	number of basal branches
	Mean	2126	80.93	1082	1046	37.15	41.93		2923	115	1379	1546	48.24	65.22		1962	76.12	972.6	990.6	31.85	43.45		2122	83.95	1043	1080	35.95	46.95
	Std. Deviation	545.9	21.89	310.4	388.2	11.27	15.45		709.2	35.78	443.5	553.9	18.8	23.46		527.4	18.86	255.2	471.6	8.585	16.9		480.6	17.32	254.6	388.4	11.03	12.93
	Std. Error	105.1	4.212	59.74	74.7	2.169	2.974		116.6	5.883	72.92	91.06	3.091	3.856		91.81	3.283	44.43	82.1	1.494	2.943		107.5	3.874	56.92	86.85	2.467	2.891
	Lower 95% CI	1910	72.27	959.1	892.2	32.69	35.81		2686	103.1	1231	1362	41.97	57.4		1775	69.43	882.1	823.3	28.8	37.46		1897	75.84	923.4	897.9	30.79	40.9
	Upper 95% CI	2342	89.58	1205	1199	41.61	48.04		3159	126.9	1526	1731	54.51	73.04		2149	82.81	1063	1158	34.89	49.45		2347	92.06	1162	1261	41.11	53
		1994.78	62	1413.35	581.433	48	14		3709.76	115	2254.91	1454.85	66	49		1387.18	50	905.926	481.254	32	18		2893.65	93	947.329	1946.32	27	66
		1741.97	59	1257.46	484.507	40	19		3800.33	103	1776.88	2024.65	40	58		1582.92	66	861.785	721.133	35	31		2370	75	1018.09	1351.91	29	46
		2257.91	73	1213.82	1047.95	31	37		3086.69	98	1077.63	2009.06	30	68		1879.1	68	1309.22	569.876	41	27		2913.39	102	1754.04	1159.35	63	39
		2299.16	91	1160.28	1148.86	47	39		2903.32	91	1185.71	1721.18	33	54		2092.12	66	1254.74	839.745	29	34		1815.27	59	1028.78	786.483	26	33
		2207.42	102	1292.63	914.787	51	51		2071.57	66	1010.09	1061.48	34	32		2182.07	67	1525.25	656.824	44	23		2357.52	109	887.411	1469.61	39	69
		1930.21	101	911.126	1028.1	39	56		1983.24	92	1048.9	934.346	49	43		1306.84	46	1034.85	275.337	29	14		3041.46	100	1083.97	1957.49	28	72
		2388	74	1067.84	1320.16	36	38		1676.69	59	646.546	1030.14	21	38		3633.81	85	791.82	2841.99	15	70		1463.69	58	737.322	726.372	28	30
		3096.83	111	1633.98	1465.43	45	61		2369.05	109	1295.19	1078.7	58	48		1591.42	52	941.358	650.062	25	27		2370.52	75	1553.93	823.487	37	30
		2042.98	38	774.413	1268.56	11	27		1506.98	58	941.591	565.386	35	23		1967.39	54	568.103	1399.29	18	36		2531.08	63	985.716	1545.36	15	48
		1120.33	40	728.438	391.892	27	13		3730.6	142	680.192	3055.96	24	113		2004.78	79	942.906	1061.88	29	50		1879.9	43	1023.45	856.447	19	24
		1608.43	50	505.488	1102.94	16	34		2137.94	105	796.128	1341.82	31	74		1725.65	78	741.621	985.555	27	48		1603.81	84	971.221	632.587	50	34
		1754.67	76	503.961	1254.05	20	51		4235.83	167	1790.57	2444.75	62	103		1520.4	62	621.208	899.19	19	43		1792.2	91	914.526	877.676	37	54
		1735.91	92	866.181	869.734	44	48		2514.49	93	308.217	2206.27	11	82		1701.8	73	1141.99	556.767	40	31		1811.86	86	899.666	912.193	38	48
		1977.54	95	1240.16	738.662	47	39		3238.11	116	1224.54	2017.02	42	71		1205.84	59	506.143	700.801	17	41		2266.7	93	1233.71	1032.99	41	52
		2156.9	79	1085.95	1072.64	27	49		2392.07	97	1532.38	859.872	58	38		2873.89	139	971.968	1920.9	32	99		2054	92	1077.69	973.542	43	47
		1703.1	73	931.668	771.434	34	39		2558.85	151	1144.35	1414.28	72	77		1868.3	80	828.51	1039.79	33	47		1920.33	105	970.429	950.655	46	56
		2004.63	80	1072.81	931.816	27	53		3149.46	137	1271.06	1878.4	55	82		1091.04	42	622.685	468.356	20	22		1602.49	94	860.436	741.015	43	46
		2309.64	85	1260.31	1049.33	48	37		2135.73	92	1219.02	916.707	46	46		1722.79	75	911.855	810.937	38	37		2106.42	86	941.57	1162.66	37	47
		1537.18	57	699.923	837.259	26	31		2463.91	81	1563.5	900.411	35	46		1695.38	75	852.599	842.785	47	28		1375.67	79	668.387	707.279	31	48
		2136.56	71	1506.29	630.27	45	26		3264.91	127	1399.03	1865.88	54	73		1899.08	77	1007.43	889.909	26	47		2272.97	92	1293.12	979.853	42	50
		2391.19	86	1172.45	1218.73	39	47		4022.76	179	1982.78	2043.02	84	90		1659.09	80	749.768	909.326	32	48
		2125.91	91	776.819	1349.09	32	59		3168.92	143	1877.77	1293.19	81	57		1904.4	69	1059.07	845.327	31	38
		1988.65	69	1158.53	830.121	39	30		3636.94	100	1834.93	1799.07	40	59		1864.96	79	819.901	1045.06	29	50
		1816.87	84	965.565	851.308	47	37		1932	94	1127.02	804.327	48	44		1919.67	67	1069.98	849.69	31	36
		3142.65	107	1183.21	1959.63	35	70		2699.12	112	1521.44	1176.95	60	50		1995.94	97	994.506	1004.09	41	57
		3882.07	128	1783.32	2099.87	45	73		3052.58	121	1653.26	1399.33	53	68		2776.86	96	1538.62	1238.24	43	53
		2061.58	111	1043.68	1017.9	57	54		4432.74	226	2475.28	1963.25	98	118		1736.08	82	856.738	879.342	36	46
									2778.49	76	1119.72	1658.77	23	53		2880.21	93	1377.14	1503.07	36	57
									3436.93	122	1385.92	2053.61	37	82		2028.87	95	1100.79	928.073	40	55
									2509.32	79	1269.18	1240.14	34	45		2469.32	92	927.557	1541.92	22	69
									3511.16	139	1135.25	2378.52	40	96		1807.81	87	813.148	994.664	34	53
									2947.49	130	1256.33	1691.16	49	81		2236.2	82	1113.04	1123.06	33	46
									2398.63	64	1623.18	775.451	33	31		2547.79	100	1333.54	1214.26	47	53
									3108.94	134	1817.05	1291.89	67	67
									2869.45	146	1608.73	1260.72	62	84
									3501.37	160	1654.97	1846.18	61	98
									3249.55	131	1497.35	1752.2	59	72

## Sheet: Fig 5K arbor pri+sec+ter
	Figure 5K. Neuronal arborization analysis for NDEL1 and TARA over-expression groups - primary/secondary/tertiary dendrites
		Control				NDEL1 WT + mTARA WT				NDEL1 332/336A + mTARA WT				NDEL1 WT + mTARA Δ401-487
	Number of values	27				37				33				20
		number of primary dendrite	number of secondary dendrite	number of tertiary dendrite		number of primary dendrite	number of secondary dendrite	number of tertiary dendrite		number of primary dendrite	number of secondary dendrite	number of tertiary dendrite		number of primary dendrite	number of secondary dendrite	number of tertiary dendrite
	Mean	6.76923	18.7692	14.2308		7.34286	21.3714	22.3714		6.72727	16.8788	13.5758		7.2	18.85	13.8
	Std. Error	0.261991	1.01573	1.12907		0.220553	0.824097	1.41367		0.31764	0.851422	0.923217		0.387977	0.805491	1.12062
		7	10	12		8	21	30		7	10	8		11	24	13
		4	13	17		6	21	22		8	14	5		9	19	10
		7	19	11		5	22	17		7	10	23		6	18	19
		7	19	18		7	19	9		5	11	13		8	13	8
		8	19	23		7	15	17		4	13	15		10	20	22
		7	19	20		8	20	16		6	9	8		9	22	22
		6	14	14		8	17	7		7	14	10		6	17	5
		5	22	19		7	20	17		5	13	9		7	15	10
		10	10	3		5	13	12		8	16	8		5	18	8
		5	12	4		8	24	27		7	14	17		6	10	6
		7	13	7		7	16	22		6	16	14		6	21	15
		8	19	9		10	28	35		8	18	8		9	18	14
		8	22	18		9	24	13		6	15	15		5	21	13
		5	18	20		9	24	22		8	16	4		8	18	16
		6	21	13		5	22	18		14	29	22		5	19	19
		9	19	9		8	25	32		5	15	21		6	22	16
		6	16	16		6	27	27		7	12	5		6	16	18
		6	21	17		7	19	13		7	16	12		7	19	16
		6	18	7		8	12	27		7	17	10		8	25	10
		6	12	20		9	32	39		5	19	15		7	22	16
		7	26	10		8	25	25		9	16	12
		7	23	10		6	20	25		6	17	13
		8	21	13		8	21	15		7	16	14
		6	27	22		7	18	27		5	17	16
		8	28	23		6	21	30		5	27	14
		7	27	15		8	32	39		5	28	15
						9	19	13		7	18	16
						6	23	21		7	19	22
						7	15	17		8	24	12
						8	29	31		7	20	18
						6	22	30		8	23	11
						5	16	10		4	17	19
						8	21	25		7	18	24
						8	17	30
						7	26	29
						9	24	24
