# Supplementary material for: Sequential phosphorylation of NDEL1 by the DYRK2-GSK3β complex is critical for neuronal morphogenesis
Source: eLife. 2019 Dec 9;8:e50850. doi: 10.7554/eLife.50850 (PMC6927744; doi:10.7554/eLife.50850)
Supplement: Figure 6—source data 1. [file elife-50850-fig6-data1.xlsx]

## Sheet: Fig 6C LifeAct FRAP plots
	Figure 6C. LifeAct FRAP F-actin dynamics assay associated with NDEL1 knockdown and rescue groups - raw data
	LifeAct + Scrambled shRNA
	Time	Mean	SEM	N
	-18	100.09	0.366682	27		98.9018	101.947	99.689	100.549	102.82	98.7229	102.648	98.7312	100.738	101.753	99.5518	99.3405	100.108	99.3679	93.3139	100.031	99.3154	101.108	100.271	100.775	101.411	103.382	100.322	99.3294	100.028	100.512	97.7582
	-16	99.9603	0.151164			99.1204	100.674	100.109	99.1837	100.721	98.2061	101.298	99.6447	99.6209	101.275	98.7756	99.7996	100.512	100.228	100.531	100.725	99.904	100.436	100.168	99.7368	100.171	100.891	99.9441	99.8105	99.8825	98.9408	98.6198
	-14	100.056	0.161202			99.94	99.2929	99.2485	99.7293	98.9435	99.6823	100.561	99.8667	101.015	100.06	100.562	100.569	99.7797	100.143	102.328	99.3239	101.176	99.1282	100.029	100.041	100.269	99.4016	100.107	101.085	100.979	98.1857	100.06
	-12	100.045	0.196823			100.435	99.2957	100.02	100.246	98.7351	101.66	98.7771	101.03	100.109	98.3193	102.506	100.162	100.003	100.17	102.076	100.06	99.9867	98.7993	99.6262	100.121	99.5351	98.5993	99.284	99.9619	99.8166	100.928	100.961
	-10	99.849	0.258747			101.603	98.7907	100.933	100.292	98.7808	101.729	96.7164	100.727	98.5173	98.5927	98.6047	100.129	99.5984	100.092	101.751	99.8599	99.6181	100.528	99.9063	99.3263	98.6134	97.7269	100.344	99.8134	99.2945	101.433	102.6
	0	0	0			0	0	0	0	0	0	0	0	0	0	0	0	0	0	0	0	0	0	0	0	0	0	0	0	0	0	0
	2	8.24289	0.372636			8.09513	8.42395	8.41522	6.04488	6.13191	7.54035	8.58151	10.0106	5.62387	8.1587	6.80816	7.8071	8.71108	7.44234	7.69805	7.73332	8.40078	6.16086	8.21865	5.36432	9.94774	12.4831	7.38493	12.1405	10.2747	6.5453	12.4109
	4	12.6333	0.657733			11.5125	13.1858	11.3407	8.58152	8.87514	12.239	12.7229	14.7372	10.0249	12.9965	9.32927	13.2962	15.4208	11.3837	11.1916	11.3684	13.0887	7.45494	14.0734	8.03392	14.7009	18.7489	11.6185	20.4964	15.293	9.04852	20.3352
	6	16.0247	0.864295			14.4716	15.9636	13.9442	10.4481	11.2034	15.7939	15.4953	18.9059	12.7031	16.1732	10.7289	17.1704	20.3103	14.1947	13.2691	13.7281	16.5001	10.9013	17.3016	10.757	17.8495	23.9988	17.0077	26.5048	19.7413	11.1554	26.4453
	8	19.1791	0.987993			16.6516	18.3325	16.5588	11.8434	13.0902	19.8206	17.5901	23.6558	15.3963	20.7604	15.3818	20.3769	23.8481	16.412	16.6788	15.9449	18.9772	13.5199	20.7369	14.0362	20.3424	28.1618	20.5416	31.6945	23.9084	13.3864	30.1871
	10	21.9126	1.1804			19.0653	21.8182	18.1757	13.6421	15.5765	23.0411	19.6824	27.2324	17.7226	23.8108	18.1524	23.2741	27.0164	18.5248	18.3116	17.5321	20.6887	15.3462	23.7315	16.2643	23.2882	32.1193	22.834	35.7395	26.4898	14.681	37.8796
	12	24.453	1.28617			20.4147	23.453	20.7693	15.9386	17.5929	26.8627	22.3153	30.2766	19.3594	26.237	20.7387	25.987	30.0781	21.1167	21.9285	19.0925	22.7261	17.0272	25.467	18.4696	25.2018	34.8583	24.8595	40.6844	29.9091	17.2562	41.6117
	14	26.7569	1.36583			22.6827	24.7768	23.1768	16.7598	19.2355	30.7106	23.4868	33.0819	22.3127	28.3018	23.2918	28.3869	33.4712	22.2104	23.5525	20.2914	26.0308	18.6576	29.236	20.8642	27.5727	37.5875	27.8575	43.7896	32.2487	19.0096	43.8533
	16	28.5895	1.44417			24.3537	26.5207	25.1079	18.8931	20.6817	33.0019	26.9641	35.136	22.0327	30.0234	24.463	31.6203	35.961	23.931	25.4284	21.9324	29.2926	19.5114	31.4388	21.9667	28.7005	39.8362	29.0157	46.6382	33.755	19.5097	46.2014
	18	30.3658	1.55324			25.8508	27.7894	27.615	20.0294	21.875	35.3522	27.9759	35.7417	23.6725	31.8044	26.8015	33.2004	38.2362	26.2965	25.5768	22.7276	31.9203	19.7165	33.6312	22.4113	30.4178	41.8403	31.6805	51.4435	36.7471	21.6006	47.9227
	20	31.9797	1.61648			26.8949	28.8131	29.4104	20.3005	23.0232	37.4733	30.9403	35.8154	24.3458	32.9825	28.3932	35.7068	40.5727	27.8587	30.5677	24.3451	33.4953	20.5637	35.1159	23.3876	32.3645	43.4587	33.39	53.5956	37.7936	22.2542	50.5886
	22	33.5552	1.62707			28.0831	30.4723	30.0771	22.2846	24.986	39.1805	32.7534	37.5616	25.2992	34.8882	31.3535	38.4181	42.1499	29.9695	29.648	25.8382	34.7282	21.2953	36.9425	24.2198	35.2367	45.3307	35.3386	55.011	40.0818	23.8146	51.029
	24	34.7403	1.66716			29.673	31.4141	30.3362	22.8126	26.4491	41.0447	34.6825	38.2328	26.1434	35.5859	32.1634	39.6176	44.5281	31.2589	29.8148	27.82	36.2139	22.0482	37.5574	25.2689	36.2177	46.5459	36.6394	56.9906	41.3607	25.1966	52.3723
	26	35.9767	1.68815			31.2223	32.6724	31.0514	23.7053	27.4216	40.5324	35.3552	40.5497	27.7102	36.55	33.7146	42.1969	46.5954	32.7662	29.5018	28.6036	37.9641	24.8398	38.1429	25.0961	37.1569	48.4299	38.7411	59.1212	42.7637	26.7613	52.2041
	28	37.2488	1.70028			32.6912	34.2099	33.27	25.9268	28.1205	41.4045	36.7082	42.8832	29.493	37.3031	36.037	43.4561	47.3202	33.1449	30.2776	28.474	39.9631	25.7109	39.8186	25.2899	38.8882	50.1975	39.4938	60.7705	43.8801	28.3483	52.6371
	30	38.2707	1.71413			32.6923	35.7252	34.1071	26.0484	28.28	43.0447	38.0303	43.4609	30.3161	38.0342	36.4534	44.985	48.2796	33.2513	32.6592	29.415	42.0676	27.5124	40.0163	26.9986	39.0132	51.3068	40.965	61.5123	45.4386	29.4663	54.2282
	32	39.5785	1.78531			33.6397	36.7476	36.0342	27.1898	28.2433	43.3385	38.0044	46.0096	31.1896	38.8661	36.7817	47.8424	50.8451	34.2942	36.3915	30.7269	43.3827	27.5325	42.7618	28.0621	39.6134	51.4294	42.6984	63.6734	47.2538	30.0813	55.9849
	34	40.5395	1.78036			34.5971	38.1471	37.4076	28.3311	27.7836	45.0812	39.219	48.3609	32.2999	38.8882	36.1159	47.981	52.3749	35.3852	38.0376	32.1576	44.6365	29.055	42.4857	28.9432	41.4863	52.5093	43.834	64.7966	47.1691	31.5889	55.8952
	36	41.6972	1.80316			35.3667	38.4975	38.2075	28.3994	30.9466	46.5084	40.5228	49.3407	34.0096	38.8762	36.5761	48.9294	54.9211	36.2459	38.2153	33.0168	46.797	28.9963	43.3488	31.0816	42.9338	53.5115	46.1114	66.1148	48.4322	33.1092	56.8072
	38	42.7626	1.77645			36.5306	38.3046	38.9758	30.1446	32.4768	47.919	42.461	50.6605	33.9017	41.3954	37.5661	50.1371	55.9404	37.0074	39.6287	33.8565	46.5026	30.2259	44.3963	33.4258	43.9847	53.9317	47.9955	66.7174	49.9729	33.4854	57.047
	40	43.8851	1.77187			37.8201	41.8024	39.3779	30.105	34.4554	49.1457	43.2689	52.2187	35.5526	41.2441	40.0423	51.2156	56.5085	38.4433	39.8852	33.9773	46.0603	32.0126	44.93	35.7802	44.6946	55.7804	50.1313	67.6809	50.8995	33.6702	58.1936
	42	45.0438	1.72327			39.3058	42.5156	41.4871	31.066	35.9516	49.875	44.2826	54.1654	36.8051	43.3055	40.4107	52.7742	55.8574	38.7581	41.8295	35.5842	46.4772	34.4816	46.877	37.8068	44.0093	57.7139	51.2153	66.901	53.6026	34.0222	59.1033
	44	45.8356	1.71213			40.2548	43.1056	43.8165	31.4718	36.8462	50.3358	44.5952	55.072	37.6522	43.8786	42.2141	54.5036	56.8045	38.9597	42.8163	36.3487	46.8346	36.6089	48.1122	37.22	44.2828	57.7089	51.64	68.0953	54.8754	35.0568	58.4512
	46	46.5444	1.66301			40.1194	44.1902	45.011	32.2297	37.5227	51.2339	44.2428	57.034	38.7946	43.7318	45.5461	56.0961	58.5747	41.111	43.5154	36.7221	48.8497	38.4206	47.4334	36.6271	44.5515	58.3012	52.4293	65.6426	55.3051	35.7836	57.6798
	48	47.3222	1.69198			39.8208	45.5427	45.5401	32.6459	38.0711	52.3738	46.3235	56.2195	38.97	44.5142	47.5115	56.598	59.3036	42.2786	42.8731	36.8946	49.1595	39.8412	49.4649	36.191	45.7631	59.7028	53.4573	66.0718	56.9556	36.5538	59.0562
	50	47.9102	1.64856			39.837	46.7019	45.4588	32.5982	39.0565	49.8912	46.1358	56.1252	40.0611	45.195	47.5112	58.0731	59.2133	43.0063	41.7988	37.7551	49.3335	40.1815	49.7251	42.7881	46.1359	60.8663	54.1273	66.4464	57.5992	37.9676	59.9857
	52	48.672	1.62759			40.4716	47.3488	44.7979	34.969	41.1005	51.2718	46.645	56.603	41.0528	45.4119	47.1885	58.9243	59.3844	43.7918	44.2694	37.9209	50.9463	40.1246	50.047	43.3789	46.0558	62.3699	55.7546	67.1787	57.2089	39.1065	60.8199
	54	49.4031	1.60644			40.7016	47.5913	45.39	35.7138	40.6634	53.4843	48.8868	56.8663	42.4793	46.5758	48.6598	59.9504	61.0074	44.1156	45.6236	38.4976	52.9143	41.495	51.6037	43.5902	46.5304	61.6802	55.8255	67.2944	58.7089	39.1214	58.9112
	56	50.1616	1.61378			41.5776	48.3129	44.5027	37.0638	42.0485	55.5401	50.1579	56.7777	42.148	47.1464	49.6533	60.5726	61.1237	45.2246	48.0483	38.6242	54.5794	41.3036	52.3584	45.8576	46.4596	62.0669	56.3988	68.296	59.3246	39.2102	59.9851
	58	50.8098	1.66269			41.972	49.7084	45.9482	37.1775	43.3037	56.4384	49.4613	57.4704	43.2727	46.447	48.9206	62.0625	61.1552	45.427	47.3267	38.9206	57.31	41.5738	53.069	46.8989	47.2728	62.8251	58.1247	70.1709	60.2264	39.7452	59.6354
	60	51.4916	1.6591			42.4003	50.5189	47.1227	37.4117	41.2146	56.8576	51.2813	57.4292	44.5296	47.4274	48.0283	63.8443	63.1024	46.182	47.9115	39.2983	57.7999	43.5686	53.662	48.1619	49.7049	62.8409	58.5189	69.0766	61.2054	40.5209	60.6536
	62	52.2195	1.71526			42.486	51.1289	48.0291	37.6398	42.3428	59.2999	49.984	58.1771	45.1381	47.2056	48.5339	65.5522	63.9213	46.8407	48.6822	39.5715	58.1528	43.8249	54.0275	49.7995	50.2149	63.0277	58.4772	71.0325	63.0055	41.8922	61.9384
	64	52.8516	1.77565			43.0801	52.3739	47.0038	38.5242	42.8983	61.4005	52.5673	56.693	44.8074	48.2621	47.573	66.0802	65.1423	47.1635	48.6867	39.6832	60.1916	45.2054	53.4393	50.818	50.4347	63.45	58.3919	72.2938	63.4816	42.0466	65.2998
	66	52.7732	1.75216			43.335	51.8787	45.7748	39.0175	42.459	61.0914	50.9347	56.963	45.914	48.0499	46.6641	66.9238	65.7014	47.7808	48.3166	40.5268	57.0692	45.7821	53.0881	51.6714	50.7799	62.447	59.009	71.4814	64.2503	42.3198	65.6462
	68	53.0562	1.73328			43.8713	53.3324	44.7765	39.7656	43.8464	61.2011	49.7064	57.2036	46.5263	48.5234	50.7593	67.4363	65.0503	47.9954	47.1334	41.3976	55.9114	44.6343	53.0893	53.0007	52.0542	62.4719	58.3197	71.5341	65.2624	41.6937	66.0203
	70	53.4983	1.75984			44.6525	53.3614	43.9874	40.847	44.7497	62.4843	50.1557	57.6857	45.4888	48.8498	52.688	67.5674	65.7649	49.132	45.544	41.9546	56.7373	43.8647	53.9588	53.839	51.8626	64.7456	59.411	72.4514	64.2652	42.6915	65.7148
	72	53.9133	1.73206			45.2777	54.3874	45.9086	41.7466	44.6491	63.7915	50.2018	57.8543	45.5049	48.4114	51.9826	68.2384	66.3706	48.4305	46.6431	42.1838	57.6668	44.1791	55.7814	54.1054	52.3215	64.5389	59.6396	72.0838	63.7873	44.2567	65.7165
	74	54.2191	1.74657			46.5488	55.6968	46.7379	41.9556	44.4337	61.4607	50.9184	59.1896	45.7507	47.9908	53.4033	67.7142	65.1233	48.1109	45.8751	41.893	57.7101	43.9735	56.4296	54.8843	52.6839	66.439	61.2918	72.9507	63.8067	44.3118	66.632
	76	54.6358	1.77663			46.896	56.5726	48.5987	42.2273	43.2788	62.9638	51.6695	60.7531	47.0374	47.6417	54.0562	67.3799	65.6136	47.6785	45.7755	41.5553	57.3934	43.2417	57.3357	56.2241	53.2168	68.0745	62.1019	73.1612	64.7833	45.037	64.9006
	78	55.2652	1.75949			47.7431	58.8795	49.632	41.3948	43.4374	64.0215	53.6391	62.1955	48.2033	47.3102	53.5937	68.8337	66.1261	48.0574	46.7586	42.4926	56.443	45.4696	58.0006	55.3345	54.178	67.8662	62.5127	72.9247	64.6801	46.5429	65.8899
	80	55.6771	1.76465			48.7441	60.8125	51.0511	42.4776	45.7608	64.7023	52.0036	62.6658	47.7371	46.9019	52.8408	69.2593	66.5981	46.9465	48.8068	43.6219	56.5585	45.588	58.3291	55.505	54.0775	69.1461	62.1779	73.5156	63.7997	46.0901	67.5631
	82	55.9024	1.72971			49.837	59.7962	51.5686	42.7965	44.8461	63.7231	53.2337	63.4664	48.6405	48.0792	53.8113	69.8083	66.8119	48.4872	49.1951	43.2214	62.4339	44.7161	56.0735	55.4353	53.1632	69.5651	61.8094	72.3661	64.7085	46.5885	65.1838
	84	55.9784	1.73246			50.4861	59.4187	51.0037	42.5072	45.5465	64.7433	51.5013	63.9903	49.7525	48.9943	54.1524	70.2316	66.11	48.9729	50.4203	42.9992	62.4026	44.7308	55.5388	53.6346	53.9457	69.888	62.0764	72.9316	65.4432	46.1482	63.8465
	86	56.4286	1.74799			51.0242	59.9927	50.873	43.4327	46.0964	65.8651	52.8468	63.3861	50.1856	49.1189	55.4709	71.6104	67.4859	51.2995	48.9549	42.8603	63.344	45.6707	54.9332	53.4306	54.1276	70.8497	62.15	72.9947	64.9635	46.2663	64.3378
	88	56.7652	1.81537			50.5982	60.894	50.0133	43.9339	45.1631	67.9349	53.5638	62.5749	50.6912	49.2374	57.4538	72.7356	69.7582	51.4259	46.6952	42.7654	63.9843	46.7376	55.1967	55.6734	54.1653	70.8084	62.1672	73.0662	65.9167	45.9792	63.5261
	90	56.8169	1.86042			50.4059	59.9245	50.5288	44.2691	44.7874	67.7813	54.136	60.2692	52.2982	48.5552	59.7255	73.1335	70.2249	51.9303	45.8899	41.7645	63.9359	46.2769	55.203	54.3637	54.3929	71.2644	63.0206	74.2826	65.6356	45.7478	64.3095
	92	56.9401	1.86554			51.0444	59.6649	50.2021	45.0909	45.0759	67.7933	54.1428	64.0687	52.2567	48.312	59.3117	73.9081	70.6085	51.6654	45.7757	41.7898	64.0246	46.9005	54.489	54.3003	54.5361	72.4939	62.1119	73.2545	64.6469	45.8087	64.1058
	94	57.1822	1.89596			50.7844	60.3813	49.2408	45.6947	45.3166	67.8426	53.5537	64.257	52.6253	48.5692	61.0326	73.889	70.9074	52.1493	45.3021	42.014	63.7773	47.399	53.7645	55.5371	54.2034	74.0616	63.1569	73.2597	65.4831	45.788	63.9276
	96	57.4691	1.86113			50.7775	60.3786	49.8214	46.0261	46.1392	66.9411	54.5428	65.1807	52.305	48.6096	62.0077	73.3192	71.1522	52.5684	44.8457	42.5387	64.8236	49.2289	54.5491	55.6937	54.4453	74.4022	62.8276	74.0437	65.0975	46.769	62.6319
	98	57.77	1.83008			51.7815	61.7174	50.2423	46.886	47.3687	66.1036	54.5117	65.1555	51.4708	48.7613	63.4928	72.481	70.5069	51.6903	43.1275	43.1075	65.9248	51.374	54.5457	55.2382	58.324	73.9346	63.6116	74.1778	65.2404	46.8608	62.1529
	100	57.9075	1.74746			53.1326	61.227	52.37	48.0531	47.9778	64.9798	53.7069	65.7609	50.7025	49.0749	62.7981	71.8173	71.2987	51.8233	43.5002	44.0388	65.1507	51.704	54.9486	56.092	58.3777	71.9391	63.7265	74.0453	65.1142	47.0671	63.0741
	102	58.3885	1.76242			54.8416	61.7268	53.6697	47.754	48.0781	65.2963	54.5266	67.307	50.6179	48.9022	64.431	72.4455	71.509	51.6235	45.6833	44.126	65.2375	50.36	55.6413	57.186	58.3839	71.9481	64.1896	74.6335	65.8138	47.2338	63.3238
	104	58.7004	1.75905			55.6015	62.9488	54.1784	47.3843	47.6717	66.3965	53.9803	67.6827	50.5351	48.3746	64.6705	72.9315	71.4985	52.3133	46.5273	44.5924	65.374	52.3409	56.0075	56.1244	58.6403	72.1849	63.4816	74.4996	66.0498	48.3451	64.5747
	106	59.0488	1.77948			54.2177	63.2967	55.8333	48.0501	45.8397	67.4768	53.9471	67.8536	51.0406	49.3181	65.0179	72.9926	72.4612	53.1212	48.4704	43.6971	65.9595	53.6151	57.1263	56.7932	58.5801	72.3924	64.3098	74.8352	66.9172	47.7534	63.4008
	108	59.2532	1.75618			53.8895	64.0022	55.5332	49.2611	50.0746	68.6255	53.6476	65.2112	51.9629	48.4444	64.8562	72.9774	72.7211	53.6269	49.103	43.2985	65.7411	52.1479	57.0873	56.867	58.6238	73.4211	64.1662	74.8495	66.9661	47.6169	65.1149
	110	59.6235	1.75205			54.5268	64.6178	55.4411	49.1779	51.062	68.6055	53.5005	67.1817	53.3918	48.1765	65.4045	72.9837	73.5173	54.2266	50.5817	42.8423	65.9422	53.2579	55.7722	58.9473	58.8406	74.5183	63.807	74.8813	66.8656	48.381	63.3824
	112	59.8021	1.78699			54.9469	62.4643	56.888	48.9597	52.3879	69.4637	53.1785	67.9865	52.7186	48.5552	65.0151	73.5647	73.7332	53.7306	50.8659	42.5883	67.3798	52.9777	54.9487	59.2634	58.1757	74.6564	65.4719	75.2334	68.1469	48.5918	62.7627
	114	59.8874	1.79145			55.9851	62.8434	57.6835	50.032	54.1121	70.2428	51.2976	68.6264	53.2987	48.8035	63.4287	74.1195	74.3428	53.7047	48.811	43.074	67.4311	53.2929	55.5319	58.605	58.1266	74.6583	64.6822	75.3566	67.958	48.6253	62.2867
	116	60.1503	1.87926			56.2585	64.3733	56.6437	47.8112	55.0716	70.4424	51.2809	69.5554	53.886	48.3882	66.2645	75.7462	77.163	53.4333	47.0833	43.5263	70.4979	52.8636	55.8561	58.239	57.6279	74.5099	64.6504	72.4512	68.1941	49.8192	62.4212
	118	60.2445	1.90702			56.441	64.5053	57.8999	49.1629	53.024	70.3794	51.2797	69.7606	54.8398	48.3694	65.3981	76.4117	77.7351	54.4704	45.6818	43.1987	70.7224	51.9409	56.1481	58.0763	58.3515	73.7411	66.232	72.2027	69.2941	49.4371	61.897
	120	60.3026	1.92106			56.4718	65.1796	58.0823	48.8899	53.3123	70.2822	50.343	66.3941	54.9385	48.0885	66.1577	77.5107	78.2519	53.7273	47.2198	44.1954	70.9836	52.491	56.2279	58.4762	58.8098	74.91	65.4908	72.6689	68.581	47.5708	62.9151
	122	60.2266	1.90131			56.4316	64.0165	58.1158	49.5315	54.1607	69.8495	49.7545	65.8978	55.1187	48.812	67.1656	77.9982	78.0325	54.3232	46.6428	43.8682	70.1993	52.9116	56.0374	57.9639	58.9278	74.3082	64.1064	73.0546	69.1858	47.7374	61.9657
	124	60.1289	1.88914			57.2721	63.3515	58.3281	50.4498	53.2341	69.376	49.6578	63.8526	55.9198	48.3152	67.7477	77.9249	78.6535	55.8225	45.5034	44.0454	69.9589	52.4393	56.09	57.4513	58.2622	74.0663	64.8472	71.1383	70.3512	48.2561	61.164
	126	60.6473	1.91237			57.6274	62.9757	58.0623	49.47	52.0003	70.3964	50.7028	63.4461	56.474	49.0114	70.0604	78.1282	77.3578	56.4952	46.2181	43.7754	71.5942	52.7788	57.0116	59.7569	58.818	73.9363	66.5026	74.9971	68.7787	49.4551	61.6467
	128	61.0211	1.94059			58.6051	63.5869	58.1167	50.0134	51.8877	70.3316	50.8924	66.0872	54.9896	49.5686	70.6332	77.8632	78.5954	55.8208	46.5017	43.9346	71.4539	52.8112	57.8876	60.5437	58.9555	76.4905	66.1754	74.3106	69.2774	50.1289	62.1063
	130	61.2467	1.93192			59.0497	64.6319	58.8481	51.2271	52.722	69.5659	50.2157	66.9976	55.3131	49.2553	69.8875	78.7157	78.5384	56.2644	46.1783	43.749	70.3163	53.0183	57.6373	61.9967	60.2407	76.185	66.85	75.0984	68.9874	50.5654	61.6056
	132	61.1132	1.98054			59.9202	65.3727	57.2798	51.4263	52.4657	69.9076	48.8635	66.7505	55.0189	48.5726	71.4573	78.9779	78.0522	55.7979	44.9698	43.1309	69.779	53.9964	57.2626	61.3996	58.4876	74.8612	67.0926	75.9179	69.6814	50.8964	62.7171
	134	61.4637	2.09033			59.3593	67.8058	58.9685	51.1239	51.3406	70.8906	49.0929	67.3304	54.6506	47.8677	72.0844	79.8547	78.4086	55.8478	44.2582	42.9189	70.7202	54.4093	57.7034	60.1196	58.1392	80.9352	67.0456	74.681	68.9159	52.2394	62.8086
	136	61.478	2.08874			58.8528	67.7242	59.55	49.5058	51.4916	70.584	48.081	68.3417	55.6815	47.1589	72.5421	79.748	77.4574	56.6827	44.5693	43.6402	70.6363	53.6367	59.4571	60.7647	57.881	80.342	68.4195	74.0758	69.0473	51.5165	62.5173
	138	61.7234	2.12351			59.2105	67.7917	60.2355	49.7246	51.5414	71.9211	50.6542	69.4311	55.7126	47.1524	71.628	79.3872	76.4306	57.4903	41.1953	44.9154	70.3882	53.7767	59.2314	61.4625	57.0689	82.2664	69.1609	74.8946	69.7825	51.3779	62.6993
	140	61.5882	2.13066			59.8791	66.8315	59.838	51.3325	51.5564	72.1772	49.9178	69.8841	56.392	47.0042	72.0697	78.9127	76.3429	56.3173	40.5788	44.025	71.0314	53.0431	59.1388	60.9909	57.4693	82.408	68.7811	73.573	69.8974	51.496	61.9929
	142	61.7077	2.07366			60.4669	68.1612	59.1017	51.1115	53.6138	71.6558	49.139	69.2195	56.7148	45.8986	72.4016	80.2681	76.0364	55.3407	46.461	44.221	72.5782	51.5673	58.5134	60.0969	57.8824	80.3468	68.3015	73.3188	71.1578	51.9618	60.5721
	144	62.3154	2.11387			60.6886	68.6508	58.6847	51.0427	54.7843	74.4228	49.8867	70.2314	55.8258	47.8976	74.2336	79.7467	78.2372	55.3497	47.2868	44.0639	74.0363	51.8816	57.3566	60.5925	59.1139	80.4145	68.4144	74.1785	71.0309	51.7881	62.6737
	146	62.7365	2.14573			61.8263	68.5571	58.5714	52.0455	54.3972	72.9107	50.9953	71.5273	56.4575	47.9105	76.0668	80.0509	78.2674	56.0316	46.6718	43.8266	76.1128	52.3377	59.1214	60.2141	58.4175	80.7694	69.8236	73.3426	73.8298	52.7289	61.0746
	148	62.4234	2.13178			61.9499	68.8593	58.6722	52.9921	54.0063	73.658	48.446	71.1169	56.1331	47.4718	73.0159	80.3933	78.2698	56.4231	46.0723	44.1002	77.6488	52.0701	59.2322	59.9065	57.944	79.6787	68.8428	70.4437	73.6174	53.2923	61.1752
	150	62.1269	2.17081			60.9132	69.3452	57.2974	52.7071	52.4104	73.5403	48.5984	70.608	54.4207	47.717	71.8463	79.372	77.6372	55.7133	43.7439	44.4925	77.9869	52.1089	59.513	60.197	57.9052	81.1073	69.7268	70.2865	73.6276	53.4508	61.1531
	152	62.26	2.15184			60.863	69.3661	57.9946	54.6236	52.3816	75.2115	49.359	71.1947	53.7625	47.9732	69.3925	78.775	77.2438	55.617	43.5206	44.9637	78.0097	52.84	60.2612	61.21	57.4403	82.0949	69.9605	69.6433	73.9288	53.4831	59.907
	154	62.3051	2.15345			60.6178	69.3036	58.3462	52.6939	51.6177	75.356	49.0215	72.025	53.5306	47.9283	70.3432	79.5312	77.8191	54.906	45.6542	44.6606	78.4662	54.1257	59.3209	60.8494	59.4329	80.4902	70.6653	69.0421	73.6656	53.3175	59.5069
	156	62.4197	2.15109			62.6217	69.7076	59.4379	52.6888	52.7897	76.9413	49.1557	72.819	53.8392	47.3538	70.1726	79.4687	77.1953	54.9096	46.2562	43.8759	77.9474	53.341	59.0102	61.2726	58.8909	80.4934	69.2254	68.3571	74.2373	54.4816	58.8421
	158	62.4726	2.13094			63.0261	68.6323	60.5752	54.5527	52.6566	76.5258	49.02	73.2446	55.2131	46.9905	70.8627	80.0208	77.5588	54.8997	46.3557	43.7484	75.5487	53.3961	58.8221	61.289	58.5045	80.83	70.0131	67.2911	74.5191	54.7808	57.883
	160	62.7152	2.17869			63.3592	69.8666	60.7112	53.2691	53.9648	77.6672	50.1894	75.2379	55.7962	46.9884	70.9948	80.5222	77.6167	55.181	45.8236	43.9225	74.8324	53.255	59.1412	60.2092	58.7641	82.0794	69.6803	67.148	75.5311	55.1504	56.4082
	162	63.0277	2.25338			63.0666	70.0216	60.0276	53.8222	54.473	78.6301	50.3798	76.9586	55.4755	46.4828	72.1497	80.5198	78.1074	56.188	44.5714	44.648	77.3596	53.766	60.0081	59.4594	58.518	82.7202	70.5146	67.1011	75.996	55.2114	55.5718
	164	63.0252	2.23398			63.2079	68.9157	59.6107	53.1418	52.8184	80.0493	51.0449	77.5184	55.4089	45.9667	72.3501	80.7071	77.5119	55.7355	47.1074	45.4275	78.2145	53.7594	60.1747	60.0747	58.3222	81.4349	69.8385	66.2326	76.1253	54.8369	56.1457
	166	63.1779	2.30826			63.498	71.2499	60.6208	54.3746	52.1677	80.4056	49.4747	78.7458	55.5143	45.0253	72.8049	82.0158	77.4326	56.1051	45.2045	45.3811	78.4489	54.4051	59.5246	59.6934	59.9364	81.7491	70.0886	65.7571	75.3389	55.0059	55.8337
	168	63.3753	2.31146			64.3243	69.8214	60.825	54.3428	50.6192	79.3167	50.4555	79.085	56.5001	44.3908	75.3521	82.2472	77.5772	55.9496	45.6033	45.2291	77.4914	55.8737	58.3474	60.7715	59.6911	82.1156	71.232	65.5397	75.969	55.5667	56.8957
	170	63.1817	2.28522			65.4443	69.3237	62.0592	54.4147	50.2716	79.4811	49.4871	78.0017	57.4989	44.9465	74.4569	82.8684	77.5	56.4024	45.0292	44.9881	77.7446	55.977	58.4388	61.4019	59.9745	80.1519	69.3012	64.4949	75.7391	53.8346	56.6735
	172	63.5485	2.32423			65.7173	68.1029	62.1478	56.0262	50.2783	79.7304	49.7511	77.4733	58.2913	45.0273	75.6667	83.7704	80.1816	56.767	45.4252	44.8582	78.4639	55.7189	58.8106	62.9145	59.8935	79.8718	68.429	66.6396	76.638	52.5934	56.6198
	174	63.8373	2.33498			66.3223	68.8604	60.524	54.5775	51.6287	80.2255	48.7432	78.8291	58.5482	45.2006	75.1402	84.1019	80.2691	57.2913	47.1897	44.0177	79.4009	57.3966	58.1225	63.6011	60.0419	79.9501	69.6968	66.8037	76.1336	53.4254	57.5648
	176	63.5713	2.33548			67.0491	69.5374	58.3469	55.305	51.5859	80.8296	48.3438	79.7492	58.8849	45.19	76.744	82.0166	80.1199	57.3998	45.5676	44.9919	79.1815	57.3166	58.1991	62.3537	58.7341	78.1388	70.2021	65.9103	75.2798	53.3224	56.1246
	178	63.4348	2.33011			67.1242	70.2778	56.2266	54.3076	53.5309	80.0753	48.5603	78.4736	56.944	45.2116	76.5868	81.6979	79.4126	58.5353	45.6297	44.2281	79.7211	56.8625	58.7581	62.7471	60.8298	77.6469	69.0344	66.3633	76.6717	52.986	54.2955
	180	63.6859	2.3323			67.401	70.1168	60.6464	54.7786	52.1603	79.6522	49.3336	79.3391	56.9382	44.549	76.2962	81.0446	78.8541	60.2012	45.1293	43.5047	79.8278	57.7632	59.6333	62.8757	59.8079	77.7233	70.0749	66.5712	77.7687	53.0565	54.4723
	182	63.8462	2.28996			67.0395	69.9306	63.2125	55.3667	53.1336	79.0791	50.0896	78.4638	55.8498	44.9677	76.6736	80.2068	80.6731	60.5606	46.1367	43.4925	79.8318	58.5575	59.3027	63.0179	59.215	76.0918	70.0405	68.0765	77.7156	52.7974	54.3254
	184	63.7391	2.26708			66.024	69.6439	63.4447	55.3147	53.351	78.9951	49.2986	75.3429	54.7553	44.6182	75.2861	78.2697	80.692	61.0304	46.717	43.8394	80.2829	59.0296	59.293	65.1324	58.7783	77.1552	71.4103	68.355	78.4799	53.6157	52.8005
	186	63.7682	2.31256			65.5247	70.6493	65.0717	55.41	53.8391	78.2858	47.8262	74.7047	53.8325	43.8379	77.1696	81.2884	79.6925	62.1679	45.9732	43.461	79.7468	59.891	58.5493	64.62	58.7027	76.7601	71.3065	68.7643	77.698	54.3003	52.667
	188	63.9334	2.25113			65.816	70.8688	67.7006	55.3291	54.81	78.6799	46.763	74.4359	53.7064	44.3085	75.9634	81.1718	79.8903	62.5762	50.7854	43.2629	79.2044	60.0589	58.8985	63.9096	57.7849	75.2383	71.3927	67.3538	78.5508	53.2227	54.5191
	190	64.2863	2.29319			66.2383	71.6632	68.1999	54.9146	56.0476	78.7691	46.787	75.708	53.4875	44.8117	79.166	80.687	78.8098	62.7338	47.8472	44.6491	81.1822	61.5077	58.0866	63.8803	59.1067	76.1808	71.3234	67.4243	78.2467	54.3184	53.954
	192	64.1192	2.26687			65.9568	71.6633	61.925	57.9476	55.8643	76.1985	45.6657	75.9618	54.0927	45.5447	78.6364	81.0483	79.5218	62.0115	47.481	44.6292	82.4528	61.4743	57.8464	64.0953	58.3969	75.204	71.4696	67.7195	78.2477	55.2275	54.936
	194	64.109	2.2771			65.4349	71.83	61.9704	57.6093	55.8433	75.9403	45.0866	79.224	53.2596	45.3291	77.5733	80.9148	78.6688	61.7809	47.0249	44.249	81.7043	62.7042	58.3838	65.4332	59.1811	73.8457	71.9007	67.9697	77.9372	55.1977	54.9462
	196	63.901	2.35008			65.2566	71.3917	60.1215	58.0972	53.4991	75.995	44.3246	80.2956	53.45	45.6202	76.5976	81.5632	80.0703	61.2138	44.9796	43.4615	78.8396	62.4779	57.6094	65.5026	59.6815	74.7988	71.0972	70.3169	79.4339	55.2758	54.3554
	198	63.8169	2.38324			66.1728	71.1929	59.0485	57.6218	50.7602	76.9127	44.0499	80.7424	53.0334	45.4354	75.535	81.2888	80.1645	62.24	44.6825	44.3027	77.3973	63.1505	57.2324	63.9087	57.7305	78.3163	71.7355	69.21	79.3217	55.0338	56.837
	200	63.8736	2.4638			65.9933	72.6722	58.8872	56.7532	51.5633	77.0982	43.5637	81.758	52.4262	44.7572	74.365	82.3459	82.6591	61.7225	44.4271	43.6525	77.6643	62.459	58.1624	64.614	57.0231	78.5457	70.4286	70.8565	79.1354	54.7396	56.3149
	202	64.2884	2.48364			66.8799	71.8124	59.9402	56.8697	52.4984	77.6573	45.1798	81.0705	52.8752	45.217	75.8404	83.4726	82.8172	63.1906	41.9454	43.4778	78.9577	62.5438	58.8469	64.0447	58.6035	78.134	71.6458	70.74	79.8853	54.856	56.784
	204	64.4797	2.41592			66.5421	70.8681	60.7168	58.0417	51.6019	78.0759	44.8936	80.682	52.7626	45.9487	75.6062	83.4455	83.0762	62.3248	45.8164	43.5585	79.7263	63.0846	59.462	64.5016	57.9497	77.3323	71.7997	70.6395	79.0526	54.788	58.6542
	206	64.3545	2.37864			66.3865	69.2288	62.1259	57.242	53.7102	78.9443	44.3501	78.8512	52.6671	45.8505	75.5159	83.675	81.9018	62.8005	45.2488	44.3221	80.085	63.6408	60.4455	63.5108	57.2544	76.4602	71.6212	68.752	79.7582	54.5874	58.6343
	208	64.4652	2.45619			67.293	67.9149	61.7338	57.1849	56.4375	78.6955	43.0602	79.5935	53.109	45.3783	75.6817	86.1581	81.6275	63.2169	44.0413	43.3482	81.208	62.1867	59.6298	64.4793	57.176	77.191	72.2476	68.5666	79.5341	54.6937	59.1741
	210	64.1622	2.47779			66.9406	67.147	61.3002	57.2581	55.5418	78.2814	42.5659	79.1809	52.1272	44.6149	76.5178	86.1816	80.7937	64.4299	42.282	44.2389	80.3786	61.8712	58.8379	64.114	56.7896	77.0086	73.6477	67.392	79.2083	55.1739	58.5546
	212	64.1648	2.56862			67.6947	68.1097	58.8628	54.5844	56.2171	77.7426	41.6964	79.9135	52.4272	44.3553	78.2979	86.2588	81.9988	64.2248	39.962	45.1587	82.3815	60.8548	58.7855	64.2889	57.1533	75.7043	72.0876	67.8462	80.6931	55.3623	59.7869
	214	64.2508	2.59279			66.8948	68.5245	58.7405	54.9598	54.2794	78.9153	40.9858	80.7929	53.5082	43.9532	77.8697	86.6298	80.7374	65.1686	40.2871	45.707	83.4833	60.708	57.9667	67.1577	56.3951	75.7546	72.0942	67.7067	80.0513	55.3638	60.1371
	216	64.0648	2.57039			66.3874	69.8826	59.2013	54.5222	53.7718	77.2628	39.8181	79.5011	53.7941	44.0237	78.5669	82.7362	79.9416	65.1232	39.4534	45.8844	83.6888	60.1671	58.1643	68.1076	58.1113	75.2138	74.9862	66.7478	80.8141	55.8157	58.0631
	218	64.4024	2.52482			66.639	70.3763	60.2801	55.8617	51.4588	77.3707	40.425	79.3694	53.0988	43.8998	79.1916	83.2263	80.4981	66.8048	42.4544	46.7065	83.2694	59.6833	57.9331	66.4968	59.0995	74.7604	75.3536	67.2068	80.5933	56.5199	60.2877
	220	64.5691	2.53882			66.8502	70.873	62.386	55.1054	48.3233	78.4195	41.4008	78.3738	54.2109	43.7181	79.8081	82.8202	80.5109	66.7968	41.8199	47.5412	83.2488	59.9995	58.386	65.3379	60.3047	75.1429	76.3842	66.3868	81.2156	57.0211	60.9804
	222	64.4289	2.51383			66.7477	71.1963	63.5508	56.4839	50.7874	77.7777	41.1311	78.4555	53.5769	43.3212	79.7172	82.7634	80.1551	65.8599	42.8334	47.2209	82.6437	60.2767	59.1372	63.5463	59.9142	73.5742	75.433	65.5305	83.2949	54.9464	59.706
	224	64.4282	2.51806			65.2114	70.2843	65.4844	55.4967	49.7004	77.0656	41.5553	80.5546	53.1228	43.8639	79.6686	83.7063	80.4327	66.9391	45.556	46.4334	82.9301	59.7159	59.4492	61.9708	58.2873	73.7917	76.7847	65.6996	81.1781	53.9981	60.6797
	226	64.5213	2.49879			64.3559	69.9667	65.9613	56.0593	51.6555	76.5078	41.7393	78.4924	52.3233	43.2811	79.0216	82.1826	81.6203	67.0806	45.2468	46.9658	84.0103	58.9348	58.2668	65.0616	59.2319	76.1819	76.5381	64.7591	81.0871	53.8129	61.731
	228	64.8019	2.47368			63.7459	69.6534	65.6487	56.8226	52.7759	74.9027	44.6254	79.618	52.5038	43.2223	78.9454	81.781	85.6652	67.5028	45.3997	46.4682	84.4616	59.4287	58.6604	65.756	59.0287	74.1666	76.8063	64.7412	80.2521	54.2634	62.804
	230	64.8573	2.45007			64.6553	69.6917	65.2558	55.9319	53.4089	75.7484	45.7303	78.8293	53.0878	42.6519	80.2502	79.6904	85.221	68.672	46.1646	46.9241	84.8979	58.3707	58.616	65.4324	57.0842	74.2673	76.6847	65.3415	80.2457	54.8394	63.4531
	232	64.8049	2.45983			65.221	67.5089	65.5943	54.3585	54.2159	76.7058	46.0271	77.2749	53.5811	42.574	79.0921	78.7278	86.0891	70.1478	46.5718	45.8701	85.8094	58.4206	57.7013	66.1277	57.6112	74.7114	76.6501	65.0017	80.5066	54.6231	63.0079
	234	64.98	2.48334			65.9039	66.4151	66.1106	54.7729	54.5834	76.5387	45.922	77.0085	54.4387	42.1793	77.5883	81.6032	85.62	69.1818	45.3638	46.0017	87.4776	59.0717	58.382	67.8305	58.7449	74.1209	77.0233	64.8782	80.4195	54.3175	62.9613
	236	64.9415	2.49634			65.574	66.8961	65.6779	55.5267	55.0865	75.9846	45.9266	76.9596	54.0752	41.9438	77.7735	82.1123	84.4551	68.5556	44.465	46.0397	88.1308	59.0344	58.1216	67.8167	58.6926	74.8355	77.1885	64.5054	80.5973	54.1215	63.3239
	238	64.5644	2.45468			65.3756	65.5089	66.4984	55.523	54.7118	75.9196	46.2122	75.6704	52.9285	41.2781	77.6828	80.7095	83.7612	67.6371	43.4126	46.5873	87.3037	57.8342	58.3124	68.4957	59.0593	73.8358	77.2799	64.3457	79.2119	55.3352	62.8073
	240	64.4148	2.44655			64.7285	66.3304	64.9455	55.8646	54.8292	74.2565	46.9185	75.4591	52.9309	42.3045	77.3793	82.0195	84.9842	67.8623	43.2676	46.4347	85.7871	56.0932	58.4382	69.0467	57.7523	73.8219	77.7813	62.8575	79.1001	54.9863	63.0193
	242	64.6836	2.47783			64.432	67.3807	64.933	55.5669	56.2167	76.136	46.2283	77.1799	51.4791	42.8592	78.714	82.2442	84.902	68.2895	45.1732	46.1976	85.5698	56.6943	57.5084	68.4074	59.2374	75.0502	78.0372	63.6804	79.4284	54.6202	60.2908
	244	64.803	2.48869			65.4564	66.3843	63.9707	55.5119	54.5978	75.7319	47.8958	78.4171	51.4286	42.4093	79.4013	83.34	85.1386	67.8589	45.293	46.2062	86.3361	57.9776	58.63	69.1624	58.2471	74.7784	76.8165	64.3115	79.1069	54.899	60.3739
	246	64.7738	2.45463			65.1472	68.8887	62.0654	56.6416	53.8972	74.354	48.478	78.7092	52.7035	42.3045	79.0885	84.0293	85.0459	67.9693	45.8852	46.5211	85.7598	57.6811	61.094	68.1768	57.0879	75.4219	76.6313	64.257	77.6418	54.8272	58.5855
	248	64.8155	2.51396			63.4627	67.8324	58.7024	55.8704	51.6038	74.6069	49.2153	78.8618	52.7175	43.3919	78.95	83.2985	86.0423	69.3576	45.9212	45.8048	87.5082	57.8248	62.6395	69.2939	58.4728	75.3482	76.0849	64.3241	80.3889	54.7497	57.745
	250	64.9351	2.53159			62.962	67.6578	62.1958	54.4581	51.2966	74.7535	48.0875	78.548	53.062	43.4945	79.2394	83.906	85.1013	69.7588	45.8854	45.9956	88.2736	58.6473	63.163	70.6956	57.9039	73.9934	77.0814	63.3633	80.8999	56.3741	56.4495
	252	64.7505	2.5011			63.2279	68.7904	61.0037	55.0731	51.1346	75.5918	49.7549	76.842	52.59	42.6769	79.1798	84.3222	84.8988	69.3725	46.2697	45.2175	86.9133	59.0075	63.8782	70.9701	57.3833	71.9325	76.7348	63.0453	80.4051	56.6801	55.3668
	254	64.7546	2.54072			63.3811	68.9779	60.1059	55.1549	52.7605	75.6068	49.2918	75.9005	51.6784	42.2764	79.896	85.4879	83.8852	70.8357	45.1159	44.1339	87.4674	59.3765	63.3866	71.0123	57.4921	72.5056	76.8881	63.3368	79.9411	56.6751	55.8047
	256	65.2686	2.55666			63.3421	68.5957	61.6245	54.6615	52.8062	75.9323	50.5039	74.4402	53.9275	42.7236	81.9761	85.3648	86.2057	71.0455	43.163	43.5053	88.4841	61.1139	62.8002	70.788	58.8875	71.7947	77.3848	61.9553	80.0593	57.8909	61.2772
	258	65.3487	2.53792			65.5426	69.3097	63.4338	54.3008	52.9868	74.6549	49.588	76.0173	53.178	42.1702	82.3412	84.9505	86.7598	71.6486	43.8396	44.2494	86.8395	61.0419	62.8181	69.6766	59.7329	71.3206	76.6053	63.593	80.3053	58.0257	59.4848
	260	65.3789	2.46892			66.3659	68.5829	64.56	54.4342	52.37	73.4448	52.6164	77.1266	53.4007	41.949	82.8609	84.6275	86.8869	71.7337	44.5525	44.6618	83.2492	61.5653	62.3228	68.391	58.9024	70.516	77.1607	63.0204	80.9469	58.7778	60.2048
	262	65.4279	2.39724			67.3257	68.01	66.8014	54.1565	52.5219	72.2875	53.9814	76.2028	53.4745	41.559	82.2695	85.2111	86.353	72.1416	49.3249	44.6039	81.0861	60.6658	61.3229	68.5106	58.5364	70.6696	77.4796	62.2182	81.707	58.8266	59.3056
	264	65.4293	2.38544			67.4276	69.2693	66.2152	52.9346	52.2344	71.3104	53.5601	76.551	53.9473	41.657	81.7605	82.8817	86.1136	72.5405	50.3737	43.6604	81.5992	60.5062	60.7547	68.8777	60.4055	74.1504	76.6298	64.1509	80.9578	58.8013	57.3206
	266	65.6139	2.33741			66.8089	68.5114	65.0065	54.127	53.3636	74.7678	54.9585	75.7672	54.8446	41.6405	80.8619	82.3278	85.1418	73.0739	51.4158	42.9305	81.1718	60.9593	59.6596	69.236	59.584	74.2075	76.4596	64.3598	81.8684	59.7349	58.7878
	268	65.2819	2.35151			66.5452	67.3036	65.9139	52.3907	54.0587	75.2212	54.9718	73.0105	55.7482	42.4172	80.2931	82.7644	85.5015	73.6784	49.8099	43.3979	81.3892	60.2675	59.3598	68.3884	58.5297	73.183	76.9788	62.2143	82.4149	60.0846	56.7762
	270	65.6594	2.41494			66.13	66.5318	67.0678	50.4346	53.9526	76.2401	56.5715	74.0319	56.3168	42.1653	81.4126	81.8514	85.6591	74.3002	50.8343	43.0893	83.6741	58.8937	59.7228	71.1964	58.3227	73.4908	77.6461	63.8154	82.8447	59.3385	57.2689
	272	65.9349	2.43155			66.2101	65.581	68.5458	51.5808	52.4493	76.4852	56.8193	77.2053	56.5672	42.4209	80.6013	82.4352	86.7493	73.9841	51.4962	43.1824	83.9948	58.5929	59.9192	72.8291	59.4997	73.0445	77.4135	62.6644	82.5413	60.0845	57.3459
	274	65.6409	2.44457			65.8029	65.1669	66.3248	51.5757	52.7812	74.5741	58.265	77.4139	55.2077	41.8055	81.6119	80.845	86.1214	74.3133	51.5132	42.8017	84.4982	57.8183	59.3955	74.0378	60.2219	72.1333	77.4287	62.8435	82.8835	58.788	56.1323
	276	65.5507	2.49282			66.236	65.603	68.1137	50.964	53.1264	75.5034	55.9712	80.0531	53.6093	41.2459	80.615	80.839	85.3578	74.0923	52.5791	42.4678	85.0548	56.5862	58.5953	72.9604	59.2732	72.265	76.8706	62.1594	83.5154	59.6704	56.5406
	278	65.444	2.51419			66.0571	65.65	67.3026	50.5554	52.7384	75.3141	56.9939	79.5814	53.8391	41.0269	81.2735	78.3695	84.5952	73.9655	51.3757	42.6839	88.194	56.2729	60.0617	72.2711	58.7071	71.8787	77.5426	61.6833	83.5506	59.6486	55.8549
	280	65.4918	2.50896			65.7562	64.2672	65.8187	50.3691	54.3475	74.0389	58.2576	79.7592	55.2563	41.7386	80.5465	82.3706	85.2702	72.8728	50.2741	42.1231	87.4092	57.0262	59.5535	69.7361	60.5123	71.0998	78.3392	61.8733	84.551	58.7218	56.3898
	282	65.4065	2.54151			65.3439	65.311	66.4424	50.5936	54.3679	73.7147	58.7858	83.9806	55.3107	40.7646	80.6658	82.8005	84.8866	71.417	48.9171	42.5227	85.16	56.1321	58.5374	69.9091	59.9182	71.6922	77.3869	61.6375	84.7778	59.3889	55.6095
	284	65.3822	2.54819			64.7398	66.4986	64.4411	50.8094	55.124	73.5472	58.3699	82.5679	55.2839	39.9287	79.4411	83.1369	86.6866	71.4906	49.2868	42.1729	85.1513	56.1035	58.7437	68.8827	59.5426	71.321	78.209	61.6582	85.1813	60.4455	56.5551
	286	65.4409	2.54427			63.655	66.8882	64.7311	51.2463	55.8257	72.46	58.0304	83.6955	55.9432	40.9164	78.2044	82.8854	88.1675	73.894	50.2909	42.7932	84.6746	55.3322	58.7207	68.1018	58.6971	70.6352	77.3743	61.4668	86.4222	60.1241	55.7272
	288	65.2649	2.58788			62.2217	69.062	64.3062	50.2024	55.1589	70.6569	58.4027	82.6347	55.7759	40.775	78.8273	83.9183	87.936	73.9263	48.7839	41.8809	84.7972	56.6632	57.447	69.0259	59.2528	71.5685	77.3083	61.3008	86.0351	59.3775	54.9062
	290	65.3055	2.63209			63.881	70.4998	65.474	49.6535	52.9322	71.5317	57.3438	82.2269	54.6139	40.7485	78.7282	83.3103	87.1839	73.9282	47.1751	41.3519	85.1615	56.1489	56.8241	69.9916	59.7363	72.7093	77.449	62.9031	86.0262	60.9578	54.7569
	292	65.5169	2.60987			64.8257	69.7077	66.5542	49.9687	50.9387	72.0803	58.8079	80.9215	54.8979	42.2115	80.8702	83.9586	86.625	75.1533	48.8306	42.337	86.3663	55.7126	57.671	70.2922	59.3964	70.7079	76.9776	62.5065	85.8528	61.3501	53.4324
	294	65.2689	2.67256			64.4941	69.5726	65.3105	49.7029	50.4314	72.0742	57.9408	81.2578	55.556	41.4296	81.7005	82.6799	86.0288	76.4628	47.0889	41.2564	87.8408	55.1351	57.0665	69.5775	58.2871	70.3753	76.827	62.7285	85.897	61.4299	54.1092
	296	65.5866	2.72519			65.2411	69.0934	63.7015	48.5658	49.6965	72.4978	57.5417	82.6127	56.2351	41.5917	81.4785	83.4664	85.9467	76.4161	47.5559	40.61	89.4988	55.7952	56.7094	71.3964	58.945	71.2679	77.4055	65.0369	85.9694	61.2806	55.2827
	298	65.7318	2.75009			65.3016	69.4373	62.6013	49.0305	50.979	73.2662	58.5041	84.0703	55.7762	41.6528	82.1413	84.0928	86.2947	77.0808	49.6442	40.0523	89.0284	55.219	56.5335	70.8319	58.8125	70.9116	76.8584	64.808	87.0873	61.2031	53.5402
	LifeAct + NDEL1 shRNA
	Time	Mean	SEM	N
	-18	100.6	0.23354	22		100.284	99.2175	103.388	100.472	102.654	101.152	98.793	99.7274	101.485	100.913	100.59	101.805	100.87	100.614	99.7429	100.943	99.4167	100.733	100.284	99.3967	100.856	99.8529
	-16	100.228	0.184529			99.7926	99.1132	101.12	99.8312	101.147	100.74	99.3841	100.279	99.9078	99.3003	101.997	99.6591	100.49	98.0611	101.195	100.506	100.283	100.174	100.953	99.6802	100.55	100.859
	-14	99.6852	0.15726			99.5807	100.59	98.2447	99.2649	99.6786	99.6318	100.115	100.349	98.884	99.672	99.5087	99.057	100.226	98.4456	100.192	99.1193	100.117	98.7169	100.071	99.8255	101.02	100.766
	-12	99.6559	0.182931			98.7317	100.363	99.0624	99.8355	98.2316	99.8558	100.911	99.8671	99.7295	100.169	98.4855	100.049	98.3358	101.181	98.9634	98.4636	100.726	99.7011	100.029	100.554	99.302	99.8815
	-10	99.831	0.227051			101.611	100.717	98.185	100.596	98.2888	98.6197	100.796	99.7776	99.9939	99.9458	99.419	99.4296	100.079	101.698	99.9074	100.967	99.4574	100.675	98.6625	100.543	98.2714	98.6411
	0	0	0			0	0	0	0	0	0	0	0	0	0	0	0	0	0	0	0	0	0	0	0	0	0
	2	7.35465	0.29279			5.75978	8.15135	5.6772	6.68283	6.69481	7.02011	7.0858	8.32473	7.83007	4.4264	8.09709	8.87986	8.17342	5.305	9.07811	7.96551	6.1747	7.10198	9.75981	6.87461	7.32628	9.41282
	4	11.0948	0.507548			8.39709	13.6921	9.6669	9.88154	10.4618	10.1764	11.8251	12.9015	11.8647	7.66305	12.9972	13.1442	12.4077	5.53007	13.8538	10.6227	8.74087	9.90496	15.0025	9.72804	11.1195	14.5049
	6	13.948	0.755858			9.86438	18.3484	12.3204	11.6278	12.74	12.7964	14.6841	16.5048	14.2282	9.62977	17.5949	17.0419	14.9636	4.98166	17.7302	12.2421	9.95651	14.9433	19.5443	12.2092	14.7234	18.1799
	8	16.5615	0.887531			11.7317	21.9369	14.469	13.6431	14.9926	14.3793	15.3853	18.908	17.4434	11.6286	19.9667	20.5519	18.0674	6.40824	21.6604	14.7417	12.6174	18.3479	22.9257	14.546	17.7189	22.2838
	10	19.0217	0.96795			13.345	26.5494	15.6514	15.188	17.1588	15.1917	18.0621	21.368	19.8807	13.8736	22.917	23.9824	20.653	10.0207	24.1813	16.2848	15.5491	20.4431	26.4555	16.6898	20.3538	24.6771
	12	21.2135	1.16657			15.6698	30.6856	17.0815	16.5041	18.9532	16.2837	20.056	23.819	21.8676	14.9737	25.4816	27.0544	22.452	8.85301	26.8361	18.428	18.9904	23.4893	30.197	18.4049	22.6761	27.9401
	14	22.8617	1.24749			15.8723	33.8929	18.3173	17.6667	20.7798	16.982	20.9847	25.8594	23.4313	16.388	26.7936	29.6572	23.8473	10.2846	28.9731	20.5868	21.6461	24.2183	32.179	20.3296	24.8097	29.4572
	16	24.807	1.3852			16.8072	37.2859	18.5457	19.2858	23.0205	19.2013	22.5992	27.277	26.608	17.4871	27.8167	32.1039	26.1015	10.7311	31.5888	22.7623	24.0325	26.4973	35.1212	21.7076	26.6519	32.5223
	18	26.4874	1.46041			17.6569	38.8438	20.7359	20.5987	24.3598	20.1622	24.7554	29.2765	28.4107	18.2156	28.6257	36.3025	27.7691	12.7419	33.8257	24.2222	25.5734	27.8079	37.5416	22.9586	27.4293	34.9085
	20	27.6781	1.52014			18.6321	39.5002	22.1782	22.3265	25.346	21.4727	24.7989	31.1913	29.5823	19.2359	30.8512	38.5079	28.9083	12.6686	36.4186	25.7472	25.4865	28.7292	37.8606	23.7309	28.7338	37.0103
	22	28.8801	1.56923			18.8602	38.9512	23.2001	23.7792	26.4121	22.2212	26.9291	32.6178	32.03	19.4407	32.7726	40.201	31.0048	13.5862	37.0889	26.8642	25.7521	29.8221	40.1028	24.874	29.7908	39.0605
	24	30.0824	1.6399			19.5501	40.7067	24.6145	25.266	27.8248	22.8398	27.7592	33.9265	32.8565	18.8314	32.3016	42.1578	32.7701	14.9332	39.2215	27.9247	26.5054	31.4802	41.2184	26.4535	31.4484	41.2222
	26	31.4379	1.64299			19.1092	42.514	26.3917	26.1794	29.1133	23.8016	29.6294	36.3138	34.2556	22.6789	33.1857	43.7722	33.1165	16.1401	40.9946	28.2406	30.581	32.2691	41.0913	27.0817	32.0589	43.1152
	28	32.7223	1.71377			20.1881	44.4303	27.5148	27.1944	30.7033	24.6508	31.6911	38.0457	35.1245	23.8314	34.5658	44.611	32.981	16.0294	42.7876	29.3337	31.2788	33.4858	42.705	28.6346	34.6272	45.4766
	30	33.9587	1.73238			20.5614	46.2289	29.1042	27.928	31.7214	25.2019	32.4018	39.0825	37.1022	24.6125	36.4637	45.9025	34.3652	18.3308	44.2376	29.7024	33.2488	35.5902	44.6007	29.7997	35.2672	45.6385
	32	35.0666	1.83931			21.2609	48.6492	28.8294	28.5711	32.5411	26.2667	33.2766	40.9918	38.6089	25.3156	39.4738	47.2585	34.6211	17.7399	46.1621	30.9437	34.113	36.7262	45.8246	31.077	36.7304	46.4845
	34	36.0972	1.91693			21.9257	51.3634	29.5057	29.9431	33.1818	27.1886	33.9687	42.0415	39.3872	26.9906	42.6499	49.6393	34.8509	18.4545	47.4744	31.2104	34.0155	36.4258	46.6511	32.2436	37.2442	47.7816
	36	37.096	1.95989			22.2997	51.8602	30.2313	31.1075	34.4659	27.2095	34.8235	43.4477	40.7726	26.851	44.434	50.9543	36.2625	20.7555	50.3309	31.2442	34.6208	37.27	47.0406	33.2922	37.7812	49.0577
	38	37.844	2.01113			24.5777	53.3006	29.8891	30.8251	35.3251	27.1951	36.6927	44.8896	42.1545	28.8601	44.285	53.1446	36.7827	21.1206	51.3492	31.1512	34.18	37.4628	47.1906	32.7865	38.9141	50.4914
	40	38.7971	2.04627			25.8882	54.688	31.7362	31.0671	35.8865	27.4365	38.6044	46.5899	42.926	30.0612	45.1077	53.8769	38.0833	21.5749	52.8116	31.6504	33.726	38.694	47.8591	33.7663	39.7351	51.7666
	42	39.4933	2.07598			25.5083	56.3191	32.6521	32.2212	36.5948	28.3657	39.7618	46.35	44.0835	32.0052	45.3049	54.7202	38.9475	21.9986	53.8332	33.1771	32.865	39.3702	48.107	33.7406	39.7439	53.1834
	44	40.2969	2.10404			26.8657	57.0271	32.3848	32.5094	37.2602	28.483	41.3332	47.3865	44.4829	33.7486	45.516	56.461	39.5245	21.4715	55.48	34.4302	35.9085	40.3833	48.6925	34.1021	39.9584	53.1223
	46	40.9502	2.14075			27.5732	57.3879	32.9931	33.5106	38.0171	29.0687	41.5781	49.1084	44.3266	33.6379	45.59	57.9712	40.5304	20.7829	55.5136	34.7768	37.1419	41.4126	49.2312	35.0676	41.261	54.4233
	48	41.7187	2.1052			27.8756	57.2401	33.7876	34.4394	38.8944	29.8263	42.2955	50.8232	43.9952	33.7844	45.8134	59.2026	41.5319	22.6434	55.7796	35.0603	38.5455	42.1401	50.5493	36.6953	42.7007	54.1884
	50	42.1459	2.17258			28.2027	58.6983	33.7848	34.9724	39.0696	29.3214	43.5091	51.4266	44.9638	34.1386	45.8043	60.4334	41.5615	22.8117	56.6925	34.9137	38.7442	41.1933	50.6026	37.4892	44.0054	54.871
	52	42.8603	2.21232			30.2309	59.4875	34.6689	35.5294	40.1743	29.8489	43.7476	52.3346	45.2647	35.7224	47.2833	60.3527	42.2247	20.9905	58.3311	35.8314	39.8031	41.3693	50.602	38.1309	44.2931	56.7053
	54	43.4057	2.22135			30.9261	59.0206	34.9351	35.4476	41.5951	29.9348	44.9391	52.7019	45.8406	36.5758	48.9121	60.0639	42.8491	20.1256	59.8253	36.8524	40.2651	42.8434	50.3793	39.1114	45.1026	56.6795
	56	44.0676	2.24492			32.6795	59.8174	36.1202	36.5123	41.5977	30.6485	46.3695	53.5593	46.1661	38.0247	48.7022	61.7833	42.7261	19.6839	59.0818	37.9963	40.8185	43.1852	50.5196	39.2404	44.7888	59.4652
	58	44.3514	2.23742			32.5999	60.4232	36.6024	36.7946	41.9283	31.3324	46.8734	55.3595	46.6122	38.1242	49.2356	61.2161	43.3538	20.232	59.2727	37.4528	41.886	42.3334	50.422	38.8499	45.934	58.8919
	60	44.9292	2.17152			33.2715	59.4241	36.477	37.287	42.7808	31.0994	47.9188	55.3751	46.4838	38.508	49.8903	61.4967	43.0255	22.2156	60.2975	39.03	45.0294	43.0172	51.4422	39.5548	46.5489	58.2684
	62	45.4412	2.19667			33.5504	60.5315	36.8974	36.9674	42.8259	32.5754	47.3361	56.508	47.2378	36.7274	49.1946	62.5114	42.7074	23.6629	61.1713	40.4699	45.9157	44.123	50.8785	40.3616	47.3695	60.1846
	64	45.9695	2.23447			34.407	60.9334	37.349	36.8702	43.4585	32.4042	47.6861	57.1366	48.1843	35.9274	48.5294	63.0887	43.1505	24.2258	61.8145	40.6414	46.8302	44.7993	52.6291	41.9538	47.7649	61.5462
	66	46.1969	2.27884			35.4854	60.0152	36.9893	36.9413	43.6086	32.8234	47.2286	57.9784	47.8305	34.0068	50.7713	63.4029	43.4673	23.8118	61.9412	41.0781	46.3955	45.6236	54.14	42.0754	48.3412	62.3758
	68	46.8224	2.23938			36.5939	61.8986	36.8686	37.0079	44.3275	33.3274	48.9053	58.0184	49.3014	34.2795	53.1746	63.7174	43.8548	26.7291	62.0246	41.42	45.397	46.2946	53.599	42.3176	48.8218	62.2133
	70	47.247	2.28175			36.3088	62.8465	36.8002	37.792	44.8704	32.7864	49.6657	57.8929	48.813	34.6959	54.656	65.4899	45.0687	27.6825	62.0089	41.3354	45.8051	46.0144	53.3381	43.4192	48.6325	63.512
	72	47.5567	2.31714			36.4943	64.1806	37.4868	38.3792	45.2883	33.2429	49.7089	59.6131	48.7135	34.8646	55.0122	66.0246	45.8184	28.2653	63.1631	40.056	44.6292	45.6539	52.2216	44.7912	49.0097	63.6305
	74	47.8401	2.25352			37.0638	59.609	37.886	39.5589	45.1933	33.0775	50.3136	59.4006	48.7859	37.7915	55.1437	67.4056	47.2877	28.1104	63.6461	39.2295	44.5829	48.1387	51.1396	45.1416	49.5247	64.4515
	76	48.0608	2.14758			37.8329	57.3365	38.5632	40.4051	46.8156	33.1785	51.4564	58.0063	49.0067	39.1782	54.9893	67.6371	47.9575	28.506	64.0164	39.9994	45.2618	48.6206	49.9469	45.843	49.7017	63.079
	78	48.417	2.12214			38.877	59.6121	37.8813	39.7238	46.446	34.5242	51.1677	58.404	48.8028	39.8511	55.9182	67.1627	48.8283	28.6874	64.6744	42.5986	45.4401	48.6758	49.96	46.3541	49.4542	62.131
	80	48.7764	2.1415			38.295	60.9234	39.1407	39.6744	46.7411	33.6975	51.624	59.1996	50.1072	40.9863	55.6474	67.3813	48.6833	29.28	64.9705	43.1574	46.7507	49.6424	49.9082	46.3023	48.2268	62.7426
	82	49.2103	2.17128			37.2531	60.1901	39.8001	41.5867	47.56	35.4047	52.865	59.5151	50.0927	40.5551	55.7443	68.3323	48.3127	28.6402	65.061	43.4562	47.8106	50.6414	49.8692	46.8801	47.9916	65.0639
	84	49.4749	2.19782			37.6125	58.9825	38.533	41.3734	48.1117	35.4284	53.7788	59.8409	50.5258	40.1616	57.5211	68.3699	47.8923	28.2324	65.568	45.2779	47.7454	51.1099	50.2772	47.2222	49.9666	64.917
	86	49.8375	2.19166			38.1423	57.1405	39.6545	41.3724	48.1116	34.7439	54.0357	60.5153	51.7921	40.0562	60.667	68.9095	48.5492	30.1323	65.0665	46.0454	47.2177	50.9643	50.7683	47.1986	49.4308	65.9113
	88	49.8315	2.222			37.7338	55.0868	39.7996	41.4172	49.2449	35.3308	54.8309	60.9766	51.8743	38.8051	62.4625	69.5788	48.7544	29.865	64.1942	46.6683	46.0363	51.8313	49.5072	47.605	48.7415	65.9492
	90	49.8302	2.24209			38.9336	55.0395	40.0982	41.937	48.9404	35.9447	55.0875	61.2749	51.2925	39.7104	62.9506	70.2108	47.9819	28.4636	64.2871	46.6442	44.5235	51.6265	48.8133	48.4797	48.1028	65.9226
	92	50.0873	2.25448			40.4175	56.1212	39.8361	41.9479	48.7024	36.2464	55.3271	61.4899	52.0172	39.0799	63.1709	70.066	48.3928	28.054	65.3799	47.5201	44.0969	53.3496	48.2813	48.6921	48.8543	64.8761
	94	50.3422	2.19012			40.1653	56.0246	40.9956	42.8286	48.8294	36.0545	55.1331	62.8227	51.7044	40.3314	63.4748	69.7546	48.618	29.5493	64.7933	47.221	45.1532	53.7014	48.9144	48.625	48.3877	64.4469
	96	50.7214	2.25768			40.4254	57.301	41.1557	42.654	48.8881	36.2658	55.7549	63.6232	52.8185	39.8218	63.6864	70.7267	48.1521	29.5523	65.3799	46.3859	45.4994	53.8752	50.1239	49.5589	48.615	65.6078
	98	51.1534	2.30709			41.2713	58.2967	41.7879	42.8205	49.6098	36.0479	56.8364	63.7189	53.3372	40.1189	64.0467	72.3097	47.829	30.069	66.958	45.4663	46.1983	54.0182	50.0742	50.2107	48.5979	65.7503
	100	51.2776	2.32151			40.1966	58.7909	41.895	43.2851	51.1942	36.1316	58.6153	63.5434	53.7707	41.0547	63.6342	72.8358	46.3481	31.1522	66.8808	44.7601	45.1757	54.759	49.5492	50.5485	47.9541	66.0324
	102	51.2723	2.30127			40.3795	59.627	41.6268	44.3953	51.4524	37.0245	59.6978	63.092	52.9704	42.1771	61.5645	73.071	46.6011	30.1092	67.1298	45.0874	44.9575	52.6932	49.3525	50.0965	48.6409	66.2439
	104	51.724	2.30605			42.8517	61.1427	42.0488	44.0142	51.4348	36.2221	60.3598	64.5829	52.325	43.4153	60.5715	73.3719	46.8935	29.7063	66.6274	47.2844	45.6884	53.3859	48.7603	50.9281	49.2558	67.0574
	106	52.0718	2.34449			42.1397	60.7145	41.775	44.0593	51.0448	35.9486	61.2013	64.3405	53.3936	43.6367	62.6993	74.0355	49.5965	30.1928	68.5567	47.9478	45.2444	53.9266	48.1878	51.5169	49.6435	65.7774
	108	52.4834	2.34468			42.1484	61.4568	42.7235	44.9458	51.5113	36.0429	61.9909	63.9137	53.3138	42.7244	65.7543	74.8327	50.2208	30.2413	66.3435	48.6161	46.4887	53.5311	48.4876	52.3909	51.2361	65.7189
	110	52.5642	2.34644			42.4764	62.3814	43.4133	45.5166	51.6345	35.3953	61.2837	62.482	53.5936	44.1741	66.7284	74.0183	50.0609	28.4362	66.6614	49.1677	47.932	54.0161	47.8186	52.7062	51.1834	65.3326
	112	52.7059	2.34206			42.7743	61.6482	42.6863	45.0559	51.7909	36.3362	61.6562	62.5818	53.0505	44.4614	67.6841	74.4024	51.5419	28.991	66.0022	49.4726	49.0284	53.8887	47.096	52.8324	50.2858	66.2627
	114	52.6545	2.36851			43.0828	61.5861	42.6765	44.9612	52.1164	35.8694	62.709	62.3294	52.6747	43.1146	67.2819	74.0511	50.371	28.3283	65.9804	48.8956	49.2573	54.9356	46.8213	53.4235	51.8119	66.1204
	116	52.7718	2.38785			42.7442	61.1225	42.7924	44.9303	52.3132	36.0257	63.9365	63.0353	53.1463	42.3126	67.7164	72.7275	51.4521	28.04	66.1686	47.8903	50.0021	55.8496	46.6009	53.3887	52.2797	66.5048
	118	53.1384	2.38279			43.7886	61.59	44.5949	45.2845	52.8121	37.0891	63.7641	63.3702	53.9771	42.0167	67.1314	73.5056	52.4572	27.7204	67.11	47.0777	49.9216	56.7736	47.477	53.6606	51.3103	66.6124
	120	53.0123	2.35755			44.6412	62.3268	43.6283	45.2603	52.7351	36.9686	64.1246	62.6931	53.6108	42.9974	66.2455	73.4366	51.8552	28.4252	66.2056	46.204	48.6555	57.0308	46.7843	55.0999	50.7131	66.628
	122	53.1955	2.27157			44.381	62.2428	43.8342	45.6233	53.8901	36.9426	63.2952	62.2232	53.9117	43.6761	64.8357	73.2218	51.7843	30.5878	67.2863	46.2413	50.1999	57.7928	47.0001	55.2009	50.2018	65.9278
	124	52.976	2.37568			43.701	62.3491	43.9928	44.8767	53.0517	36.9417	63.2906	63.1593	52.9736	41.4485	63.1987	74.5901	51.4832	28.6626	66.5658	46.2424	50.6728	58.286	46.8837	54.8165	50.7146	67.5713
	126	53.2024	2.40887			44.2345	63.1601	43.4939	46.3458	53.9992	37.8434	62.9322	62.9439	52.2891	41.497	64.4762	75.4224	51.7824	28.7288	67.3091	45.4278	50.1491	58.2124	45.6105	55.2006	51.5012	67.8937
	128	53.0337	2.44397			43.4509	60.1581	43.988	45.6922	54.444	38.2589	63.5274	64.1687	52.676	40.4802	64.9649	75.2959	50.3109	27.9228	67.4178	45.4825	50.6213	58.2772	45.4752	55.686	50.4126	68.0303
	130	52.7611	2.44524			43.021	59.5996	43.3381	45.8758	54.6496	37.6852	63.3457	63.4629	52.3125	41.0834	64.3702	74.752	50.2694	28.4714	68.6239	44.3004	49.8451	57.7105	45.4506	54.9305	49.1244	68.5227
	132	53.0352	2.37416			45.026	62.6855	44.61	46.1907	54.4125	37.727	61.6233	63.413	53.3065	43.5166	63.6624	73.8508	49.8492	29.2229	69.4161	44.0317	48.032	57.1584	45.9853	54.8122	49.6631	68.5785
	134	53.2281	2.49154			44.4613	62.197	44.6335	45.6944	54.065	37.8267	63.2348	63.8658	52.1841	43.8177	66.2034	74.6264	49.15	28.4616	69.9328	44.2467	47.3583	57.2582	45.7632	56.0372	49.5782	70.4222
	136	53.5805	2.43161			44.2787	61.2051	45.0986	46.596	53.9088	37.8188	63.4248	63.898	52.2534	43.5026	66.8766	74.3429	52.3824	30.1177	70.369	46.1195	47.6166	57.4965	44.7654	56.5238	50.2946	69.8805
	138	53.5686	2.37691			44.5004	59.5969	45.3386	46.129	53.9448	38.7847	62.8939	64.2762	52.5841	44.4437	66.6569	74.6942	51.6672	30.4059	70.8923	46.0865	48.7634	57.5339	44.2923	56.8539	50.3213	67.8497
	140	53.8704	2.35563			43.8449	60.7752	45.108	46.2507	54.7856	38.8288	63.5301	64.498	53.2717	43.7893	66.8498	73.2866	51.7276	30.4981	70.2285	48.1194	50.058	58.4582	44.9875	56.7746	50.8937	68.5855
	142	54.0352	2.36326			44.2636	63.1865	45.1668	46.8126	54.1295	39.6205	63.6775	64.5686	53.7927	44.0818	66.2931	74.2018	51.5862	29.9409	68.7104	48.2456	49.5314	58.5881	45.4492	57.2382	50.5029	69.1857
	144	54.0707	2.39043			44.0464	64.0839	45.8453	47.3881	54.699	39.564	64.1393	65.4457	54.3033	44.1419	65.2017	74.8262	52.8297	29.4873	67.7369	46.7067	49.6143	58.5871	44.6231	56.8355	50.1338	69.3158
	146	54.0952	2.32466			44.5173	63.6878	46.2107	47.8595	54.593	40.3339	65.3956	64.6397	53.5898	44.1001	64.6234	75.7017	53.1638	30.8089	65.9623	46.166	51.3379	56.2972	44.7272	57.6079	49.6335	69.1364
	148	53.7122	2.36944			44.6702	64.0017	47.0523	46.7942	54.263	40.3409	65.9662	64.1823	53.12	40.878	62.7578	75.8222	53.4163	29.9849	64.5986	45.2495	50.3668	55.4687	44.795	58.0485	50.0519	69.8401
	150	54.0151	2.40127			45.0098	64.3885	47.6452	46.7014	55.2052	40.2837	65.1471	65.1401	54.0124	40.6721	62.5646	76.1137	54.0721	29.7614	64.6809	46.2516	50.9151	57.9825	43.5101	58.1261	49.6883	70.4598
	152	54.0499	2.35975			44.3249	61.9171	46.7892	47.16	55.0988	40.4032	64.2682	65.3749	53.5899	42.3668	64.2695	75.9638	54.2965	29.9028	65.3206	46.3894	50.9896	58.4679	44.2146	59.6861	49.2456	69.0592
	154	54.2076	2.45102			44.1854	63.5077	46.5185	47.2518	54.8698	41.1487	63.6188	66.0629	53.2863	42.5804	66.8607	76.3033	54.386	27.9501	64.7425	47.4995	50.1942	59.5628	43.5821	59.3432	49.3137	69.7986
	156	54.3831	2.43544			43.4299	61.7451	46.5344	47.3693	55.5275	41.0032	65.0225	66.6858	52.645	42.9871	67.2392	76.457	55.2592	29.5458	65.4168	48.22	49.9103	59.9865	44.2493	58.6389	48.6118	69.9427
	158	54.7914	2.4217			44.4692	61.051	48.302	47.1315	55.4897	40.3889	64.3882	66.8185	52.492	45.8659	69.1548	77.8894	55.3231	30.8173	66.3772	47.8655	49.2949	60.2871	44.1797	59.0184	49.3335	69.4735
	160	54.7435	2.43428			44.5712	61.5995	48.1739	47.2154	55.3629	39.7841	65.2747	66.3325	52.1568	46.0768	68.3033	78.0384	54.7187	30.944	66.6137	47.894	49.5502	59.2683	43.8954	59.7846	48.8752	69.9243
	162	54.8367	2.44891			43.8337	62.3969	48.8149	47.5988	56.1717	39.0562	66.225	66.6679	52.7472	46.8182	68.0135	78.0925	54.5038	30.1834	65.2368	47.1584	49.608	58.8332	45.6712	60.2325	48.5619	69.9822
	164	54.7676	2.47067			44.025	61.6085	48.6892	47.3601	56.3031	39.7591	66.9873	66.7722	52.8737	45.3456	68.4724	77.9374	54.9958	29.3241	63.83	47.2672	50.4674	59.2313	44.9877	60.1169	48.3325	70.2001
	166	55.2097	2.46594			44.5519	62.5315	49.9112	48.0888	56.1035	40.1503	69.2031	66.8793	53.0158	45.2372	70.5804	77.0778	55.305	29.8033	63.013	48.788	50.3498	60.0759	44.996	59.7422	48.9593	70.2498
	168	55.1919	2.46845			44.522	60.8874	50.8207	48.5706	56.6315	40.8422	69.9217	67.5088	52.6805	45.2542	69.0471	77.6409	55.4003	29.2225	64.371	48.9618	49.9712	60.4426	44.3189	59.7306	48.4446	69.0299
	170	54.9787	2.49263			44.5824	59.8912	50.0302	48.9033	56.1943	40.3469	68.9315	66.948	53.5751	44.4907	68.5063	78.4711	55.496	28.59	64.3276	48.7754	50.1749	60.2066	43.7179	59.3636	48.3939	69.6145
	172	55.0955	2.5333			46.0951	61.9242	49.311	48.6411	56.6528	40.6884	68.7964	67.1494	53.1862	42.3983	68.0148	78.7195	55.0495	28.3225	63.6758	48.563	50.4047	60.8661	43.4714	60.4599	49.0921	70.6193
	174	55.3634	2.45559			45.8606	61.3033	49.8726	49.0721	56.6419	40.723	68.6247	67.4932	53.5538	44.6456	67.6876	79.0257	55.1661	30.0708	63.387	47.3988	52.373	61.6337	44.6846	61.0828	48.0132	69.6814
	176	55.2971	2.47631			46.2738	61.79	49.0255	48.256	56.8854	40.4832	69.8866	68.2435	53.6775	46.2617	66.2073	78.9643	55.7479	29.0501	62.3115	46.7395	52.7548	61.2128	44.7	60.4986	47.8743	69.6925
	178	55.2442	2.48657			46.4275	60.7319	50.3917	48.0961	57.668	40.009	70.0877	68.6533	53.6874	45.1118	64.9446	79.2987	54.8784	28.861	61.8179	47.2487	54.5374	61.9707	44.0607	59.9989	47.4709	69.4193
	180	55.3575	2.45667			45.9325	61.6583	50.3129	47.6317	58.3301	40.5447	70.8565	66.8434	54.1605	46.2113	63.7499	78.1763	53.988	28.8574	63.1629	47.1148	55.371	62.8195	44.0974	60.214	48.109	69.7237
	182	55.2879	2.49127			46.6018	61.0103	50.1564	47.4897	57.9519	40.3242	71.3152	66.301	54.2692	44.7939	64.2468	77.9611	53.6261	28.1153	62.9639	47.7119	56.6377	63.4222	43.2938	60.7953	47.8368	69.5088
	184	55.5538	2.43165			46.8335	60.6305	49.6863	47.5373	57.8199	40.5515	71.1806	67.1067	54.1587	45.5937	63.8505	78.4182	54.1415	29.8041	63.8048	48.026	57.1213	64.0407	44.558	60.9419	48.1254	68.2519
	186	55.8386	2.43969			48.6919	61.3066	49.0315	48.2622	57.358	40.1451	70.6788	67.065	53.7057	44.9425	64.1819	79.0796	54.1028	30.2655	65.2922	48.3211	57.7341	63.3081	44.0992	61.5804	50.2892	69.0076
	188	55.6881	2.42235			49.2072	61.5623	49.1742	47.5992	57.8926	41.0751	69.5807	67.9069	53.1755	45.4258	62.6623	79.7078	54.3803	29.8146	64.7891	48.2081	57.4309	62.4798	43.0085	61.3699	50.6895	67.9968
	190	55.5658	2.41125			49.5398	60.8633	48.9185	47.9381	57.6238	40.6047	71.5813	67.6843	53.5593	47.9764	61.5268	79.2458	54.5211	29.4015	64.7471	48.2515	56.58	60.0734	42.5529	60.8441	50.2194	68.1938
	192	55.5183	2.43156			48.1333	59.3145	49.3937	48.2107	57.7216	39.8457	72.0578	67.9744	53.1001	45.9348	61.983	79.2688	54.9916	30.908	64.6259	49.4851	55.0744	61.046	42.0971	61.233	49.796	69.2068
	194	55.6483	2.44554			48.567	61.675	48.8706	47.5809	57.8942	40.3413	72.4202	68.1869	52.8462	45.8179	61.7825	79.2312	53.5642	31.744	65.1123	47.6549	53.9146	60.8582	43.3204	62.491	50.4494	69.9402
	196	55.6428	2.43125			48.7719	62.1135	49.2799	47.6112	57.877	40.3269	70.9119	68.5679	52.8755	44.5444	63.7108	78.7613	52.9734	31.8187	65.0744	48.1746	53.0403	60.6333	43.5665	62.892	50.9922	69.6247
	198	55.4265	2.38937			49.0844	60.5815	48.9596	48.5023	58.0778	39.6918	70.4084	68.3669	52.8469	43.7982	64.6542	78.2074	52.2462	32.7811	63.6718	48.4364	51.4708	61.6726	43.1917	63.2614	51.1962	68.2763
	200	55.5592	2.42764			48.7408	60.9692	48.8242	47.6434	57.9498	39.2304	70.484	69.1245	53.5532	45.7654	65.8667	78.3213	53.0488	31.4738	63.0014	48.6461	52.031	61.5861	42.3633	62.9952	52.5297	68.1532
	202	55.6052	2.54333			48.3	62.7775	48.8166	48.0779	58.7727	39.8956	70.9573	69.3438	52.5157	44.4192	69.3483	78.5957	52.5831	30.7294	63.0392	46.6996	51.3813	62.2741	41.7008	62.8257	51.8755	68.3858
	204	55.7854	2.66849			49.1525	60.7298	48.9304	47.7631	59.7736	39.774	71.3894	69.738	52.3318	41.9392	71.4848	79.2142	51.7649	29.2885	66.2936	45.7105	53.0423	61.8184	43.2182	63.7891	50.9058	69.2274
	206	55.6503	2.55717			49.9591	61.064	47.3314	48.4745	59.0544	40.2676	70.9619	70.9826	53.0084	40.9959	69.4134	77.4582	51.1435	31.6174	65.8996	46.5798	52.7016	61.6145	43.667	63.5541	49.9963	68.561
	208	55.4157	2.5516			50.3032	61.1831	47.8472	49.1111	58.7496	40.092	72.2205	70.1065	53.2423	42.3921	70.0921	75.8555	50.8062	30.6437	64.2984	45.5515	51.8692	61.3902	42.4848	62.8104	49.246	68.8504
	210	55.9534	2.57347			49.129	60.9181	48.7332	49.1648	59.406	40.3228	73.3017	71.1453	52.8142	47.8046	70.3761	77.1736	51.422	30.7967	63.8359	44.2544	55.452	60.9728	41.8398	63.2522	49.1039	69.7552
	212	56.2704	2.54716			49.6815	61.1577	47.8954	49.7568	58.743	40.4255	72.9588	70.9277	53.9188	48.9466	69.9907	78.3874	51.9416	29.9068	63.7778	47.0171	57.1761	60.8983	41.7715	63.3385	50.4654	68.8658
	214	56.3234	2.5065			49.059	60.2144	48.4628	49.864	59.6157	40.2603	73.2951	69.7655	52.8114	50.4908	70.3996	79.714	53.0193	31.0995	61.8494	47.7681	56.9294	62.1905	41.5548	63.8858	50.3077	66.5572
	216	56.3676	2.49178			48.7093	60.6015	48.1411	49.666	60.4107	39.9875	73.1482	70.0707	53.1655	50.2384	68.5753	79.2501	53.8931	30.2909	62.3136	48.939	56.0668	62.2054	42.7816	64.8154	50.3523	66.4646
	218	56.4526	2.50242			48.8393	61.2999	47.7809	49.4996	60.8571	40.107	73.8142	70.8835	54.1285	51.5059	68.026	78.1503	54.6112	29.8661	62.2614	48.9708	55.3639	61.2073	42.4352	65.4093	49.8492	67.0904
	220	56.3664	2.43358			49.2692	60.1197	48.4399	49.7221	60.7006	40.2109	72.5385	70.4737	53.705	52.1741	65.8382	78.5473	54.8922	31.3864	62.6024	48.7685	55.5744	61.2833	41.7758	65.1497	49.179	67.7108
	222	55.9809	2.49578			49.1773	59.9341	49.0818	49.2238	59.9259	40.0119	71.9533	71.3647	53.4539	49.7156	64.2429	78.7068	54.1393	29.5256	62.0561	48.0902	55.9997	61.5747	41.1547	64.9048	49.1264	68.2157
	224	55.9921	2.53342			49.0669	58.8381	48.9445	49.7085	59.7229	39.8469	73.2745	71.2879	52.604	49.1096	63.3472	80.1059	55.1809	30.8291	64.1	46.7959	53.7686	61.2872	41.5044	65.0896	48.8621	68.5512
	226	56.4178	2.66459			49.9995	60.8759	47.8978	49.7079	60.1844	39.1947	74.4027	71.3392	52.5085	46.279	66.1834	82.0959	54.7368	30.1504	65.4978	46.5395	54.1009	62.6551	42.4786	64.1944	50.7826	69.3856
	228	56.3727	2.66407			49.4315	62.5341	48.3645	49.5208	59.58	39.0346	73.5127	71.4012	52.4105	48.0107	65.1364	82.9196	54.63	29.8911	64.8377	45.8361	54.2959	63.3222	42.3987	63.8332	50.375	68.9233
	230	56.6012	2.62714			50.23	63.4869	48.2157	49.922	60.1729	39.8583	74.57	71.4405	53.513	49.9542	64.1914	81.6427	54.8419	29.9964	65.83	45.8705	55.4521	63.7618	41.4924	63.5942	49.5891	67.601
	232	56.5147	2.6014			49.9051	63.1806	48.3716	50.3502	60.7819	39.285	72.4965	71.286	52.662	47.3863	65.4725	81.1162	53.6232	30.9363	66.2707	46.416	56.7732	63.9266	41.9838	63.2281	49.4753	68.3961
	234	56.4722	2.61488			49.8527	62.211	47.9528	50.1017	60.4865	39.3327	72.4993	70.554	52.8546	48.4359	67.0697	81.2591	54.1625	31.3769	67.2307	45.0164	57.6643	61.7336	41.3388	64.2389	48.741	68.2766
	236	56.6028	2.59093			50.3875	62.6671	48.7396	50.2676	60.1741	39.5885	72.2881	71.8763	53.9004	48.0116	67.0422	81.2272	54.7263	30.5947	64.9204	44.9054	57.8427	62.904	43.075	63.7391	48.7101	67.6745
	238	56.5058	2.58464			51.625	62.0472	47.8852	50.2317	60.3087	39.3366	73.2804	70.8751	53.9384	46.6437	67.1541	81.2818	54.0944	31.4064	62.8196	44.2315	58.1901	62.7279	44.1236	65.2154	48.1284	67.5823
	240	56.2511	2.59911			51.7223	61.766	48.0173	50.1529	59.8963	39.9634	73.1881	71.6809	53.1717	45.7691	67.4723	81.2686	53.806	30.4935	62.7408	43.2802	57.2766	61.869	43.5647	64.2653	49.5308	66.6277
	242	56.1787	2.55184			51.7538	61.2713	47.3661	50.843	60.3826	40.2492	71.9728	72.2784	53.8666	44.8545	66.786	80.3232	52.9885	31.3275	64.2045	42.7007	57.6197	61.2669	44.7734	64.3649	48.8251	65.9132
	244	56.2299	2.6253			51.0853	60.8646	47.4849	50.989	59.9829	39.2864	74.4179	71.5628	53.8787	43.6602	67.7005	79.4063	52.542	29.7023	65.0956	45.5443	57.0628	62.4059	44.567	64.4789	48.2928	67.0463
	246	56.1119	2.72682			51.0991	60.5784	46.8867	50.6928	59.8368	39.8968	75.1683	71.624	54.2974	42.2276	68.5061	81.9355	53.3137	28.7191	65.6574	45.1478	55.8401	62.8933	43.7732	63.6224	47.5917	65.1528
	248	56.4032	2.68781			51.1683	60.7433	47.6383	50.2752	59.8695	40.2234	75.55	71.692	54.3729	47.6244	69.5734	82.4083	53.0994	29.2682	65.205	44.0066	55.8918	63.0024	44.7011	63.9878	46.5436	64.0254
	250	56.1874	2.72838			51.2586	59.4612	47.3603	50.2811	59.7807	40.1487	75.6156	71.393	54.5748	45.8987	70.1855	82.6269	52.2124	29.0633	64.533	43.6699	55.2974	63.5359	44.4106	64.1216	46.0362	64.6568
	252	56.1093	2.72003			52.0688	60.2416	46.301	51.2634	59.6118	40.0932	74.6383	70.8778	55.1916	44.5977	70.8361	82.5594	51.5028	29.1913	64.5363	43.611	54.8658	62.416	44.2661	64.449	46.6881	64.5984
	254	55.9798	2.67688			51.5551	61.1899	47.6686	50.7171	59.601	39.706	73.5316	70.4192	55.2428	44.911	69.3703	82.8184	51.4988	29.0138	62.9542	43.8958	57.3803	60.9811	43.4884	64.8622	46.851	63.8993
	256	56.2385	2.66898			51.2912	60.7242	47.5547	50.5482	59.9123	39.8246	73.9176	70.73	55.4993	44.9871	69.5222	82.062	51.5718	29.7704	61.3566	44.3691	59.1163	62.8297	43.8714	65.3605	46.5849	65.8433
	258	56.0754	2.60969			50.9478	59.4286	47.4856	51.0444	60.099	40.7633	73.6934	70.867	55.0485	45.2822	68.6439	81.0998	50.651	28.9633	59.525	45.6259	58.2727	63.0479	45.5389	66.0708	46.3432	65.2173
	260	55.4684	2.5799			51.3901	57.8487	47.4585	50.5843	59.9551	40.3299	73.244	70.688	54.685	43.9654	66.3189	79.8145	49.3964	28.2972	59.7387	45.7857	57.4549	62.5407	44.9752	66.5588	46.0118	63.2642
	262	55.3599	2.59407			51.241	57.6606	47.7499	50.8978	59.8071	40.9763	73.0037	71.4102	54.1226	43.1614	67.072	79.7013	49.9566	28.4671	59.3588	45.4363	56.3664	63.1417	43.6835	66.5292	45.7078	62.4671
	264	55.481	2.61401			52.272	57.1673	47.7046	51.755	59.9172	40.7333	74.3462	71.3376	53.8625	43.2969	66.5935	79.5064	49.3174	27.7336	59.4456	46.4619	58.3347	63.1981	43.2839	66.0895	45.8853	62.3392
	266	55.6158	2.59951			51.8588	56.9669	46.6178	52.172	60.3119	40.87	73.5843	70.7993	53.6415	45.2664	65.277	80.0677	51.4544	26.747	60.2111	45.7922	58.005	63.5138	43.4669	66.1911	47.554	63.178
	268	55.7927	2.57867			51.4754	56.5794	48.3706	51.3758	60.0336	40.7645	72.7462	70.9887	52.476	46.3666	65.3103	82.0551	51.9116	27.8962	59.9818	46.0464	57.424	64.1317	44.5151	65.6208	47.4962	63.8723
	270	55.9542	2.61812			52.0723	56.8705	47.2627	51.145	60.4085	40.4104	73.0158	70.5175	52.5922	47.4354	69.9688	80.9641	52.205	27.8476	59.4398	45.846	59.7914	63.5302	43.3398	65.6352	47.0481	63.6465
	272	55.955	2.6441			51.8374	55.3478	47.8529	50.7621	60.4575	41.2484	73.5945	71.7071	53.4589	48.4769	68.6986	81.6142	51.692	27.2786	58.4241	45.5006	60.4673	64.1697	43.1623	64.9176	46.4446	63.8979
	274	55.6041	2.55897			52.0419	55.7169	47.9999	50.2174	59.6706	41.1446	72.384	70.5647	54.3692	47.885	68.4906	80.4102	50.7261	28.5788	56.8357	45.5326	60.0211	64.3449	42.8938	64.9239	45.688	62.8494
	276	54.9788	2.57742			51.7645	56.1387	46.86	50.6782	59.776	41.2213	72.9998	70.1587	54.6131	45.7274	68.6783	79.4685	51.2655	27.6473	53.3598	45.6903	59.5507	62.2131	41.1137	64.7796	45.4092	60.4207
	278	55.1197	2.61906			52.8144	56.7846	46.3214	50.435	59.0768	41.3954	72.0609	69.8022	54.8326	44.6615	68.5994	79.9585	51.4241	26.5038	56.6582	44.6799	62.0419	59.9693	42.1002	65.7297	44.9201	61.8647
	280	55.1781	2.64828			53.6476	55.3488	46.3341	50.0813	59.7779	41.5586	73.0562	71.0361	55.0428	44.2311	68.3198	81.0706	51.7409	26.736	56.604	43.5172	61.0509	59.8446	42.2839	64.8458	46.3179	61.4719
	282	55.1034	2.60287			52.621	56.1425	46.4233	49.934	60.0051	40.8625	73.3	70.684	55.852	44.5971	67.3806	80.2026	51.097	28.0306	55.6389	43.5417	61.2438	60.2043	42.378	64.5839	45.8275	61.7249
	284	54.7308	2.5812			51.6625	55.2704	48.0686	50.2087	60.2136	40.4553	73.2866	69.686	55.8219	42.606	67.4077	78.4879	50.7063	28.2146	56.4938	42.6601	61.3034	60.0567	41.4457	63.8296	45.218	60.975
	286	54.6499	2.65989			51.9635	55.5375	47.1993	50.2658	59.2311	40.5702	73.7261	69.3453	56.1009	42.6642	68.9518	78.6351	50.3083	26.8026	56.012	42.8812	61.8542	60.3504	40.6022	64.5717	44.1181	60.606
	288	54.7379	2.70045			52.681	56.2642	47.0603	50.2153	59.3721	39.891	72.6021	70.7132	55.8047	41.0339	68.4796	81.0029	49.1513	28.2598	56.7971	43.2428	61.5975	60.8668	41.1584	64.3621	43.117	60.5605
	290	54.7018	2.63578			52.0408	54.7012	47.7281	50.1073	59.3385	39.6808	71.853	70.2503	55.4489	44.5727	66.9444	80.4742	47.478	28.6121	57.7465	43.691	62.0785	60.9385	41.3887	64.4817	42.2528	61.6315
	292	54.6697	2.62393			53.0159	54.5358	46.8716	49.8506	58.6816	39.6936	71.922	69.1485	54.8743	43.7287	68.8011	79.3628	47.7113	28.1951	59.5402	44.0469	62.5705	61.5541	40.7835	64.148	44.008	59.6887
	294	54.9326	2.67289			53.2611	55.8013	47.4672	50.5719	59.0844	40.4805	72.6099	69.6511	55.0486	42.5083	70.6405	79.064	47.3851	28.6412	61.8335	42.5668	63.0279	60.8797	40.6108	63.5997	43.6654	60.1189
	296	55.1968	2.67467			52.9204	53.496	48.4314	50.0027	59.3886	40.1309	72.1432	70.0639	55.7571	48.3409	71.5515	79.361	47.3383	28.0015	61.3547	42.9164	65.0234	59.9319	40.6551	63.6647	43.0062	60.8501
	298	55.0878	2.71095			52.8966	53.9783	47.5559	50.495	58.6902	40.4968	71.1253	69.2822	56.3531	48.0623	72.5074	80.4504	46.9132	27.339	59.5438	43.0817	64.8004	59.8308	39.7125	63.5829	42.8488	62.386
	LifeAct + NDEL1 shRNA + NDEL1 WT resi
	Time	Mean	SEM	N
	-18	100.015	0.30051	23		100.545	101.012	99.9721	99.7454	99.866	99.4442	100.293	100.98	100.706	103.495	102.229	96.8231	98.6145	101.353	97.606	98.8193	99.8899	98.9971	100.97	99.4431	100.943	99.0147	99.59
	-16	99.7956	0.203019			100.476	100.659	101.48	100.314	99.9356	99.9898	100.704	100.132	100.004	98.9099	101.339	97.3738	100.095	99.9621	97.8877	99.6939	99.7233	98.582	99.4269	99.636	100.147	99.9827	98.8443
	-14	100.064	0.144475			99.5773	100.787	100.672	99.8869	100.874	101.186	99.5411	99.7015	100.517	99.0717	99.3036	100.583	99.2256	99.1615	100.721	101.198	99.7411	99.8595	98.9657	100.414	99.7724	100.552	100.171
	-12	100.179	0.212495			99.8123	98.2953	99.2001	100.361	100.031	99.7474	99.8101	100.451	99.4901	98.7493	98.726	102.348	100.606	100.364	102.3	99.9314	101.145	100.86	101.166	100.339	99.3168	100.175	100.889
	-10	99.9459	0.223233			99.5898	99.2462	98.6756	99.6925	99.2933	99.6332	99.652	98.7363	99.2834	99.7744	98.4029	102.872	101.458	99.1599	101.485	100.358	99.5007	101.702	99.4714	100.167	99.8205	100.276	100.505
	0	0	0			0	0	0	0	0	0	0	0	0	0	0	0	0	0	0	0	0	0	0	0	0	0	0
	2	8.7736	0.364807			9.70176	9.96392	10.8648	5.93858	7.41567	5.93379	9.53651	10.827	9.00921	9.58021	5.4224	9.06932	11.6458	9.85968	10.458	9.05135	6.08385	8.77538	10.0308	7.18065	7.62262	9.56746	8.25417
	4	13.4666	0.649412			14.7436	15.6222	16.2334	9.00975	10.1898	10.013	13.7439	15.407	14.7086	15.7289	8.07079	12.9286	16.9787	15.4686	20.7239	13.5658	8.39833	12.728	16.3791	10.6207	11.235	13.9092	13.3246
	6	16.9582	0.838129			18.6498	19.0191	20.6777	11.1288	12.8357	12.3858	18.1247	19.1039	18.9072	18.9387	10.0507	17.234	20.2645	19.9125	26.9532	17.9997	11.0146	15.9431	19.9884	12.1043	13.7488	18.0018	17.0512
	8	19.9706	0.871599			21.2047	22.9898	24.5299	13.6005	15.1684	14.2845	21.1714	21.8412	21.4091	22.5729	16.5377	20.3926	24.2941	23.3554	28.7398	21.4249	12.6841	18.9093	23.2129	13.8939	15.7203	21.5074	19.8784
	10	22.7355	1.04169			24.9612	24.9733	28.6255	15.6847	16.8807	16.0208	24.6167	25.2879	23.914	22.6854	19.1018	23.1093	27.6149	26.8122	34.3762	24.7228	14.6759	21.5939	27.2808	15.4948	17.5581	24.7772	22.1474
	12	25.0335	1.13029			27.4476	27.2228	30.9389	18.1987	18.3506	17.8959	27.3379	27.3575	26.4177	22.7131	22.1496	25.0008	29.6091	28.8018	38.7338	27.6077	17.1897	23.9716	31.4284	17.2676	19.3598	27.1931	23.5764
	14	27.3133	1.24526			29.3629	29.1511	33.8971	19.7668	20.3409	19.7453	29.4663	29.8197	29.2797	24.5941	23.994	27.4719	31.4662	32.5498	42.862	30.6046	18.8273	25.3671	34.1292	18.8889	21.2634	29.9487	25.4096
	16	29.186	1.23847			31.5208	31.7383	35.7574	21.9651	23.2834	22.0789	31.707	32.1685	31.1333	26.6781	24.6157	28.7253	32.2243	34.0726	43.5486	34.1249	20.0945	27.1211	36.8277	20.7043	22.5346	31.7462	26.9074
	18	31.1391	1.20534			34.4056	33.1395	38.3694	23.5021	24.7912	24.2929	33.456	33.2316	33.2986	29.7771	27.487	32.1324	33.6221	35.5736	44.1366	35.8147	22.1034	29.0189	38.2801	22.2506	24.4271	34.1871	28.9012
	20	32.8473	1.24711			35.8653	35.0637	40.599	25.2624	25.1142	24.385	35.184	34.2224	35.6606	32.9831	29.4461	32.643	35.22	39.3624	44.3618	38.4106	23.7288	31.2321	39.9241	23.9464	25.7351	36.6292	30.5091
	22	34.2847	1.2627			37.2149	37.0544	42.364	26.6268	27.9451	27.5291	37.3279	34.8653	37.8989	34.8322	29.736	34.5003	36.4376	41.6114	42.6174	40.5524	22.4776	32.7484	41.477	24.3175	26.9074	38.791	32.7151
	24	35.528	1.28706			39.1462	37.7815	43.8813	27.7352	28.9431	27.9142	38.8569	36.5084	39.6654	35.9466	31.6045	36.1309	36.2445	42.9243	43.7967	41.6927	24.7479	34.483	42.857	24.7952	27.6287	40.7361	33.1231
	26	36.7882	1.31834			40.8813	39.0633	45.6238	29.808	30.4498	29.6656	39.4337	37.2738	40.6397	36.2818	33.8452	37.1742	35.7292	44.0189	46.5544	43.6066	24.8647	35.7479	43.601	26.2207	28.0431	42.5079	35.0941
	28	38.1771	1.46514			43.6556	40.1696	47.9039	30.3317	31.6938	29.9574	40.4252	37.4389	41.9074	36.9136	33.5398	39.102	36.4878	46.5136	51.1118	46.0286	25.2807	36.0468	45.736	28.3627	29.2608	44.0054	36.2013
	30	38.9905	1.48412			43.0357	41.0472	48.9955	31.6255	32.202	29.0399	41.9565	38.1766	42.2138	35.7638	34.9985	40.9879	36.5614	46.5295	52.0968	47.5093	26.782	35.8703	47.909	29.5359	30.3939	44.9458	38.6052
	32	40.0519	1.52011			43.8999	43.4276	51.1271	33.6227	32.8573	29.2013	43.6823	37.4182	43.3479	36.8189	34.2494	41.3957	37.1277	47.0226	53.0971	49.4137	28.8429	36.4278	48.5941	31.254	31.5897	47.5506	39.2259
	34	41.1407	1.55842			45.0367	44.9031	53.5811	33.6307	34.0074	31.7828	44.7157	38.2192	43.8953	40.4631	33.1253	41.6429	37.8228	48.3036	54.0455	50.4667	30.2508	36.8458	49.1746	31.7712	31.896	49.2254	41.4302
	36	41.9531	1.56792			46.6211	46.1414	54.0621	34.8389	35.8947	31.3773	45.6691	38.6296	45.766	42.6182	31.2459	42.9016	38.3102	49.2438	52.4606	52.0455	31.8992	38.1637	50.0559	31.9753	32.6938	49.5505	42.7559
	38	42.792	1.58014			46.9126	46.6983	55.2133	35.5169	37.4677	32.9522	46.6283	39.0233	46.0941	45.3066	32.9243	44.1013	37.4684	50.3493	51.7917	53.6145	32.9931	38.534	52.283	31.748	33.2234	49.9945	43.3766
	40	44.0348	1.64889			47.8113	48.569	56.2495	36.1767	37.3038	33.792	47.2145	39.643	47.2646	47.3969	35.797	45.6457	37.943	51.0222	56.4779	54.3654	33.4216	39.4948	53.4397	33.0666	33.6263	51.6812	45.3988
	42	45.0315	1.63179			49.1926	48.5972	57.8888	37.5828	39.0532	32.6216	48.2564	39.9743	49.0188	48.3764	39.5053	47.2604	39.9719	51.8734	55.6358	55.1006	34.9967	40.2914	53.9894	32.8432	34.7633	53.018	45.9134
	44	45.8769	1.66524			51.0443	49.0897	59.1951	38.8863	39.7797	33.1388	49.3347	39.6102	49.4179	49.6959	40.0681	48.6852	40.1369	53.4311	57.6104	55.8466	35.7058	40.6818	53.7357	34.0819	35.6111	53.3104	47.0718
	46	46.5089	1.70571			52.4772	48.893	61.5879	39.4157	40.6279	34.0373	50.2786	39.4907	50.0474	50.0844	39.7837	49.2078	42.0813	54.2882	59.6406	55.8835	36.8	40.4303	53.3718	34.7302	36.0324	53.892	46.6227
	48	47.0132	1.72713			52.0164	48.7162	63.2813	40.7965	40.3674	33.8566	50.9891	39.8406	49.8414	48.2972	40.2657	50.2758	43.2222	55.004	59.9169	56.8238	38.4883	39.8	54.9318	35.1977	37.0382	54.7602	47.5772
	50	47.866	1.70346			52.2784	50.0396	63.1658	42.6704	40.8645	35.4696	51.8341	39.9775	51.5006	47.4322	40.2446	50.267	42.8096	57.864	60.1082	58.3794	40.266	40.3201	56.068	36.9393	38.6822	55.1425	48.5952
	52	48.554	1.72169			53.9943	49.9798	63.6813	43.1937	42.3979	35.7976	52.4204	40.1186	52.0181	48.7542	42.0936	51.4801	42.8962	58.9907	60.9739	58.3873	41.3274	39.9536	57.5017	37.9871	38.6509	55.88	48.2637
	54	49.0545	1.66523			54.4592	52.1272	63.8174	44.1976	42.6102	36.3545	53.0834	40.3025	52.6827	50.9999	42.1535	52.3347	43.605	59.1398	58.2761	58.2988	42.9778	40.6802	57.8093	38.6253	38.7444	56.211	48.7632
	56	49.3601	1.71592			54.5168	52.8052	64.8207	45.2021	43.8813	36.937	52.864	40.3264	53.055	50.7925	40.8207	52.206	42.7961	58.7293	60.6196	57.9746	42.3879	41.5328	59.0125	38.6263	38.9527	57.2127	49.2105
	58	49.9213	1.77399			55.3733	53.7436	65.8844	45.9393	45.2343	37.4472	52.7516	40.3077	52.7714	49.3823	41.829	53.0532	40.8084	60.74	58.8716	61.6752	43.0002	42.0132	60.1025	38.7064	40.2953	57.9625	50.2967
	60	50.1543	1.77921			56.6944	54.7727	65.6677	46.6245	45.3935	37.5037	53.2439	39.932	52.5342	53.0014	40.8733	53.4762	39.7491	60.1984	58.2537	61.7438	43.1265	42.5025	59.4355	39.6703	40.1906	58.1622	50.7989
	62	50.8547	1.84185			58.7357	55.2551	67.7846	46.9006	46.7969	39.7344	53.5935	40.1156	55.3238	51.6618	40.0804	52.3735	38.7509	60.9397	57.8358	63.1731	43.8557	42.9275	60.3137	39.6686	41.7568	59.1385	52.9409
	64	51.4901	1.79914			58.7547	55.3948	67.0768	48.1091	47.795	40.8155	54.1072	39.2473	55.6812	52.5999	41.399	52.949	39.8001	62.9826	59.3298	62.568	45.2235	43.1856	60.3257	40.5381	42.5897	59.2946	54.5049
	66	51.8622	1.79754			58.2474	55.6175	68.1219	48.5489	48.253	42.0545	54.4173	39.006	56.3518	52.6063	42.6398	53.8852	39.6421	62.4878	59.568	63.3949	46.5211	42.4881	61.3391	41.9678	42.0974	59.1611	54.4128
	68	51.9881	1.80736			58.5191	56.0702	68.6107	48.6273	48.1723	42.5052	52.4728	39.7245	57.2168	53.2869	42.3533	54.6855	41.4166	63.7432	59.9242	64.2092	45.3749	43.188	60.3672	40.679	42.5769	59.1134	52.8883
	70	52.4808	1.75291			58.9474	56.9767	68.388	49.9907	48.2009	43.2604	53.2999	39.7182	56.2755	55.6653	43.9766	54.7263	42.5592	63.0588	59.1367	65.0076	46.5093	42.6395	60.1262	41.2101	43.8059	60.1654	53.4151
	72	52.8255	1.77801			59.2044	56.4189	68.1487	51.0787	48.3163	43.3481	54.2835	39.4462	56.2261	56.7845	44.6605	53.9711	43.3922	64.1881	56.003	66.5415	46.3928	42.2452	61.6637	42.065	44.2953	61.9323	54.3814
	74	53.0586	1.82922			59.9184	57.395	68.6525	51.8024	48.141	44.4969	54.7107	38.6673	57.1162	57.0879	44.1989	55.0413	43.3582	64.8762	54.7007	66.4066	46.4433	41.7418	62.1454	42.2724	44.4002	63.0199	53.7537
	76	53.3784	1.84079			59.8604	56.0537	68.4948	52.1953	48.6943	43.5361	55.349	38.523	57.4302	58.1219	45.3447	56.1684	43.5001	64.4455	54.2592	67.2705	49.0115	41.1404	62.8662	42.5448	44.6536	64.0591	54.1799
	78	53.7078	1.83684			61.3778	56.3307	68.0964	53.1544	48.648	43.7751	55.7372	38.2622	57.6	57.3963	46.4831	56.998	42.9606	64.4301	54.9839	67.8162	49.5955	40.7335	63.6565	42.9495	46.1536	62.9292	55.2114
	80	53.889	1.87693			60.7977	56.8136	68.8839	53.4866	48.3893	44.2497	56.4354	37.4698	59.1069	58.3088	45.474	57.5502	42.5427	64.8191	53.4896	68.3529	50.5507	40.8051	62.998	43.5346	46.7628	63.2719	55.355
	82	54.2956	1.93685			62.5754	55.7871	70.674	54.8551	49.0691	44.3494	56.666	36.6006	59.2896	58.1235	45.5654	56.9008	42.342	65.6347	55.2324	68.4968	51.6658	40.3728	63.15	44.3132	47.8079	64.0647	55.2622
	84	54.5959	1.94546			63.3811	60.2857	71.5731	54.5616	49.0797	44.4497	56.7945	37.5677	58.4082	57.4201	45.9397	57.3391	41.0044	63.7884	54.2664	70.2962	51.5751	40.8443	62.2968	45.7851	48.6814	64.4132	55.9534
	86	54.9341	1.92173			64.7279	59.6643	71.1837	54.5165	48.7129	44.972	57.6531	38.041	58.6359	58.1416	48.1764	58.003	41.9709	63.3363	54.7052	70.844	50.8619	41.2285	63.4349	45.4133	49.28	64.1205	55.8613
	88	55.5294	1.8879			65.0607	58.7604	70.6614	54.7032	51.5577	45.8703	56.6508	38.8707	58.5561	60.1344	48.9987	57.8449	41.0757	65.0229	57.6003	71.2101	52.1465	41.8377	63.0656	45.9666	50.3721	64.5944	56.616
	90	55.6109	1.82403			64.326	57.9679	70.0828	55.7645	51.895	46.272	56.041	39.6543	58.5378	58.1187	50.8684	56.6801	42.5545	66.9996	58.9421	71.1213	53.4384	41.5387	62.4221	45.3198	51.2393	64.0976	55.1693
	92	55.8504	1.79703			64.6613	58.5015	70.2127	55.3094	52.1649	46.9235	56.8289	40.6347	58.3737	57.9061	51.001	57.2229	42.5112	66.3014	61.2573	71.172	53.2407	41.732	61.4775	46.1125	51.0453	64.4579	55.5101
	94	56.2548	1.82827			65.3949	57.8771	69.731	56.257	52.7662	45.5037	58.0994	40.3505	59.9519	57.5459	51.5562	57.2997	43.5527	67.2498	59.4489	72.2643	53.9436	42.2892	62.9267	45.9291	52.0109	65.3421	56.569
	96	56.2941	1.80792			66.0811	56.5412	70.0537	55.7619	52.388	46.7379	58.6068	40.7615	58.8992	56.8479	51.5168	57.2312	43.5544	67.1689	58.9037	73.0754	54.6224	42.4607	61.6667	46.5977	52.4927	65.3907	57.4035
	98	56.6571	1.76317			66.6136	55.8588	70.2781	56.5083	52.8676	47.227	58.8957	41.6524	58.2898	56.8576	52.0758	56.5092	44.7086	67.2186	61.3644	72.2232	54.2067	43.591	61.7552	46.4081	53.1512	65.9735	58.8796
	100	56.9073	1.7678			67.265	56.4422	69.8904	56.5038	53.3791	47.9889	58.2707	41.8359	58.1231	57.8809	52.7251	57.4119	45.0181	68.4813	59.4278	72.7361	54.9822	43.064	61.9517	46.405	53.7354	66.1412	59.2079
	102	56.9262	1.77669			68.102	56.9979	69.9104	57.3123	51.9319	48.0722	57.9439	42.1617	58.2545	57.9445	52.3245	57.5057	45.0376	67.9456	57.0233	73.6409	54.0057	43.4256	61.8011	47.1593	54.0479	65.9561	60.799
	104	57.1183	1.70448			66.0568	56.8717	70.1844	55.6772	52.6716	47.9408	57.8473	42.7297	59.378	59.065	51.3731	57.7835	45.5044	66.8757	60.8674	72.4179	54.7199	43.8632	61.518	48.4595	54.4104	66.4003	61.1063
	106	57.5301	1.73985			63.9565	59.089	71.4223	56.4186	52.6855	47.4607	58.0796	43.5035	60.3485	59.5103	52.5539	56.7968	45.3697	68.7649	61.3234	72.7603	54.9788	43.9403	63.9423	48.3507	54.6107	66.2994	61.0266
	108	57.9727	1.71494			63.4214	58.5074	71.0674	58.0826	52.6218	48.2432	58.1177	44.4027	60.8284	59.1805	53.7768	57.2469	44.6988	69.0579	61.8529	72.8075	56.1996	44.6734	64.7835	48.9457	55.5451	67.3173	61.9947
	110	58.2704	1.69512			64.6361	58.517	71.058	58.6325	51.6249	47.6903	58.3341	45.2963	60.9683	59.0395	54.6691	58.6021	44.0827	69.055	61.9313	72.543	56.4113	46.2038	64.1439	49.6036	56.7508	67.6881	62.7379
	112	58.547	1.73568			64.8558	58.5228	70.2436	58.5894	52.1979	48.0389	59.4217	45.515	61.011	63.9093	52.9722	59.1689	42.8981	68.8652	63.4084	73.1492	56.0989	46.2274	64.7036	49.5861	57.3066	67.4499	62.4406
	114	58.8525	1.67745			65.0586	59.7865	69.3751	58.5284	53.2516	47.2115	59.8979	45.3426	61.11	64.1253	53.9423	58.7281	44.5567	68.9227	64.6718	72.7213	57.0313	46.6235	64.496	50.3931	58.1949	66.5766	63.0618
	116	59.5552	1.71954			65.2232	61.5268	70.7112	59.8206	54.673	47.556	60.5129	45.4256	61.3379	65.3019	53.6275	57.6795	45.5103	69.8886	66.1526	73.2624	58.3939	46.8045	65.5658	50.7712	58.9941	67.5585	63.4715
	118	59.4248	1.70551			64.7898	59.9835	71.7899	59.2972	54.1508	48.4886	60.8879	45.6187	61.2469	66.2894	54.6806	56.1225	44.2473	68.4083	65.8935	73.1253	58.1067	47.6361	65.1091	50.985	58.5718	66.7197	64.6211
	120	59.394	1.65916			64.6361	60.7486	71.1018	60.0734	54.2454	48.6902	61.5461	46.8678	60.6835	66.5964	54.4116	55.5236	44.5195	68.0363	65.4903	73.3184	57.666	47.8688	64.4153	51.3594	57.8661	67.1755	63.222
	122	59.2888	1.66858			65.0568	59.7974	72.028	59.387	54.0435	48.5647	61.4173	46.9295	59.9908	67.0599	53.3482	56.0293	44.7668	66.3233	65.0159	73.5446	58.801	47.6647	64.0914	51.0138	58.4401	67.7426	62.5854
	124	59.3018	1.66363			65.7788	60.5175	72.4459	59.1613	54.3368	48.0447	61.3641	47.3956	60.2191	66.1086	52.6151	56.5228	44.9878	66.379	64.0957	73.5834	58.4329	48.1898	64.1516	50.8128	57.9304	67.4824	63.3861
	126	59.498	1.69167			66.8117	60.2569	73.9309	59.7174	54.7424	50.2529	61.4621	47.8603	60.4858	65.3881	52.8299	55.4312	43.7721	66.3778	63.5323	73.9544	57.9751	48.0848	63.8674	50.3171	59.569	67.2015	64.6329
	128	59.8601	1.75642			67.0293	60.1345	74.9198	60.1713	53.3142	48.6014	61.545	48.5267	60.3547	66.183	53.891	55.9206	43.0287	67.6117	66.2546	73.9298	60.3243	48.9975	63.6758	50.3362	59.6022	67.5997	64.8302
	130	59.8413	1.78844			66.7213	60.2598	75.2852	60.5284	54.1275	49.0864	61.4489	47.933	60.4362	66.8273	53.8519	55.9173	41.4717	68.5061	64.7716	73.5435	59.733	49.8386	64.2663	49.4119	59.8008	67.4316	65.1513
	132	59.8902	1.77784			65.3782	60.724	75.5992	60.7529	54.207	50.0173	61.1175	47.7084	60.3458	67.6894	52.3379	57.3862	41.8276	67.576	65.7863	73.1419	59.7158	49.6328	64.4606	49.3819	60.2927	67.7787	64.6161
	134	59.9468	1.78173			65.4191	61.4162	75.5459	60.6022	53.4621	50.4924	60.939	46.7391	59.9068	66.6521	52.3041	57.8354	42.6691	70.1905	67.3529	73.1857	61.0512	49.6488	63.0738	50.0992	59.9859	67.8426	62.3623
	136	60.1561	1.72133			65.932	60.7373	74.6684	61.368	53.4793	50.5234	60.3486	48.0798	59.9739	65.6885	54.2245	57.2352	43.5379	71.2112	67.4162	72.7646	62.9836	49.6111	63.2918	50.0547	60.6809	67.0891	62.6903
	138	60.2695	1.68855			66.7949	61.5678	74.9796	61.0157	54.3133	51.5954	60.8432	48.0237	59.6603	64.9413	55.1702	58.2285	43.7185	70.3545	67.8866	73.3715	62.1314	49.4829	62.0667	50.0733	61.9093	65.5758	62.4943
	140	60.5226	1.7365			67.3031	60.8304	75.2253	61.5088	54.4474	52.4095	61.5752	47.2109	60.7127	63.7338	57.3457	56.8867	42.615	69.0396	68.9203	75.0281	62.6715	49.526	63.2418	50.7189	61.9664	66.8038	62.2984
	142	60.554	1.7455			66.8829	61.0975	75.5911	61.728	55.3194	51.8167	60.5167	48.0429	61.4159	62.0925	57.0579	56.217	42.3697	68.7289	71.1109	74.3972	62.1169	48.8759	63.9636	51.5692	61.6875	66.7357	63.409
	144	60.9276	1.72045			67.8517	62.4187	77.0901	61.0123	55.399	51.718	61.1899	50.2613	62.246	62.5272	56.2606	57.9261	43.1855	67.534	69.3455	74.1068	62.4813	48.956	63.6223	51.2912	61.9123	68.75	64.2491
	146	60.8344	1.71913			66.4141	61.8375	78.7287	60.7814	54.5015	50.82	60.2331	51.528	61.1487	63.295	55.9417	57.2283	44.6684	69.5834	68.7631	73.132	64.1733	48.8306	63.3788	50.9796	61.4118	68.1465	63.6662
	148	61.1272	1.71825			65.82	61.1529	78.6484	61.9154	55.355	51.8151	60.0287	52.0995	61.0994	64.6356	56.8805	57.7591	44.44	70.5973	70.903	73.3125	64.2682	48.8131	62.0381	51.0492	62.3287	66.9579	64.0085
	150	61.5025	1.71235			68.0787	60.6704	78.7629	63.9873	55.3307	52.1699	60.0222	52.4973	61.3995	66.2352	58.2364	59.307	43.9743	70.1663	69.2207	72.4008	64.9421	49.0256	62.3313	50.9701	62.7372	67.874	64.2175
	152	61.5234	1.6861			67.9206	60.1056	78.5737	64.2773	54.7118	51.9594	60.4354	52.3835	61.2343	66.031	59.1435	59.1065	45.4812	70.7398	67.0237	71.5241	65.3845	48.1989	63.2771	50.7793	63.9042	68.1002	64.7414
	154	61.6707	1.62498			67.6669	61.0922	78.3931	64.183	55.9087	52.7305	60.1629	52.6421	61.3826	64.1676	59.5953	60.592	46.1805	69.4347	67.1128	70.9629	65.7041	47.9302	63.8679	50.9067	64.8856	68.3327	64.5899
	156	61.47	1.63644			67.5885	61.3619	78.3964	64.275	54.7206	52.5717	60.2773	52.9028	61.3495	65.1617	60.2861	60.426	46.1639	67.8938	69.055	69.9403	66.2521	47.7164	63.0884	49.5478	64.2144	67.4193	63.2001
	158	61.6637	1.76419			67.033	60.7174	79.8704	65.1808	54.9962	52.2855	59.9602	53.3755	60.1258	66.2037	59.9834	59.6506	45.0004	69.076	69.9391	73.2275	66.2709	47.1799	63.2154	49.2348	64.8691	67.169	63.7003
	160	61.7396	1.80291			67.028	61.2564	79.9283	65.9926	55.2383	52.8047	59.0365	55.5316	59.7134	66.9684	57.5639	58.6296	45.2638	70.3327	71.691	72.8492	67.2628	47.0859	62.961	47.9011	63.9441	66.4623	64.5645
	162	61.8397	1.8202			66.8218	59.7812	79.4493	66.5008	54.3501	55.9561	59.0006	56.6606	59.7247	68.1705	55.751	58.0978	45.3164	70.7361	71.9883	72.1636	67.5528	45.9224	63.153	47.9707	64.6659	67.8596	64.7198
	164	62.3608	1.796			67.4199	60.3255	78.2604	66.5855	55.8244	55.6539	59.2348	57.738	61.6053	69.0374	57.6997	57.7995	45.645	71.3307	71.8691	72.1232	69.2726	45.6373	62.9453	48.6261	65.2552	69.1962	65.2123
	166	62.5838	1.79024			67.9865	59.9171	79.6981	67.1	55.3945	56.8196	58.8556	58.7126	61.0245	68.3007	59.1816	58.0362	45.5611	71.5516	71.413	72.1546	68.6456	46.2792	64.0753	48.8318	65.5761	68.9607	65.3506
	168	62.4416	1.76123			68.314	59.6296	79.6509	67.454	55.531	55.0516	58.1247	58.2401	60.8357	67.7511	60.5861	58.0689	45.954	71.6275	69.1917	71.2529	68.7563	46.3556	63.7737	49.6318	65.4054	69.7577	65.2125
	170	62.4841	1.67672			67.3414	59.3476	78.6756	67.6666	55.0394	57.9826	57.841	58.2805	62.7066	65.8933	61.4419	58.372	45.908	70.9985	66.4078	71.2263	67.9292	47.3133	63.7973	49.6016	67.3984	69.4556	66.5086
	172	62.3652	1.7021			69.3173	58.3828	79.1267	67.2857	55.0536	58.8467	57.7629	58.3812	61.9672	63.03	62.2169	58.293	45.3847	70.2024	64.5677	71.5758	68.5609	47.5532	64.5613	48.8621	67.6463	69.0789	66.7414
	174	62.2201	1.73213			69.2114	58.1202	79.9589	66.5767	56.0493	58.9372	57.4509	57.9998	60.964	59.9871	61.4288	58.3458	45.1913	69.8262	67.5273	71.2906	69.3402	47.6535	63.9602	48.4644	68.4188	68.9356	65.4254
	176	62.3645	1.75407			68.6736	56.2642	79.9787	68.0418	56.2811	59.5996	58.3793	58.2772	59.4641	60.1877	60.8494	58.1738	45.5423	70.4655	69.8905	70.728	70.6234	47.7829	63.8952	48.8487	69.1397	67.9543	65.343
	178	62.3454	1.75036			69.1628	56.562	77.7219	67.206	55.4522	59.0857	58.6576	58.0977	61.2852	65.4019	58.5149	56.5728	43.8486	69.8741	68.7837	72.4585	71.3747	48.1713	63.221	50.0123	68.6648	68.0557	65.7581
	180	62.1942	1.7438			69.4914	56.7313	78.4881	66.7214	56.2848	59.7837	59.1251	57.8753	61.0839	65.453	57.2355	54.5675	44.2044	68.5669	67.9393	72.1015	71.052	48.2766	62.8974	50.0281	68.7817	68.0359	65.7403
	182	62.3366	1.72946			71.2958	55.996	77.1547	67.1748	55.4105	60.153	59.6367	57.6835	60.5904	64.0592	58.2499	55.2637	45.2071	68.2264	68.0145	72.6857	71.8189	48.9533	62.4311	49.7313	68.8191	68.8028	66.383
	184	62.2564	1.72754			70.041	55.9036	76.8168	67.3101	55.554	61.0387	58.6351	57.3221	59.1822	63.3529	58.2358	54.7214	46.1478	68.811	68.0541	72.8427	71.3289	48.3027	63.7359	49.5247	69.0592	69.1524	66.8246
	186	62.2656	1.72131			69.3577	55.5642	76.9598	68.2747	55.516	59.2436	58.0895	56.7792	59.6186	65.56	61.1427	54.7871	46.4272	67.053	68.9923	72.2136	70.9777	47.7649	63.3813	49.6663	68.7379	69.2047	66.7975
	188	62.5124	1.76751			70.5266	55.5521	77.4897	67.8042	54.9873	58.4142	59.1779	56.0019	58.9082	66.4026	61.8348	57.511	46.2489	66.8158	70.9418	72.2284	70.9103	46.9392	63.8613	49.7362	68.9223	68.9791	67.5909
	190	62.6627	1.801			70.8542	54.865	77.6067	69.2906	55.3764	57.8894	59.8686	54.1127	60.0397	68.149	59.28	58.0722	47.0698	67.9483	70.5682	71.9481	71.3481	47.2516	64.1513	49.5386	70.0183	68.8955	67.1004
	192	62.7488	1.83384			69.5592	53.8778	76.5253	69.7605	56.4523	58.9633	59.6014	54.4438	60.1433	69.5154	58.7066	58.2595	46.9711	67.5314	71.3812	71.5706	70.9087	47.449	63.8146	47.8956	72.5309	69.9198	67.4403
	194	62.7601	1.7809			69.1902	55.9094	75.1622	69.2085	57.0323	60.1451	59.2109	55.7185	60.6681	69.4082	59.2236	59.1406	46.163	67.7188	70.0373	70.5747	70.3544	47.1288	64.7728	46.8298	73.1345	68.894	67.8571
	196	63.0932	1.82476			69.6489	54.9437	74.6064	69.9437	57.125	59.9034	58.4714	56.5643	62.8854	69.9557	59.9446	59.0887	46.5048	67.4276	70.9075	71.9909	71.8872	47.7406	64.5824	46.0108	73.2954	69.6634	68.0526
	198	63.201	1.83534			70.1912	54.368	75.1088	69.1162	55.6955	59.846	58.7436	55.2613	63.0483	69.4934	60.1804	58.4437	49.0551	67.3981	72.9501	71.8674	72.1583	47.4255	65.3229	46.409	73.6768	69.0716	68.791
	200	63.4639	1.81963			69.8023	54.604	74.5096	71.0903	56.0792	59.8949	58.7291	55.458	62.6769	69.563	61.2074	57.416	50.6893	67.7109	74.1618	72.1901	72.0356	48.2597	65.1441	46.5351	74.4916	69.3259	68.0947
	202	63.3143	1.8126			70.7673	54.1573	73.5874	71.3359	55.9127	60.7507	58.8895	55.731	61.8932	67.7935	63.1573	57.3308	51.0947	67.3115	73.1198	71.405	72.0426	46.486	64.2094	46.6581	74.6276	69.1359	68.8324
	204	63.1076	1.80652			70.5653	52.7475	73.6199	70.8599	56.5552	59.6017	60.0889	55.6286	61.1393	68.9489	63.8039	56.9454	50.9028	66.8224	71.9516	70.8073	71.4345	45.8636	63.7628	47.0969	74.5008	69.1323	68.6956
	206	63.3694	1.82165			71.2635	53.0275	73.3596	71.3663	56.8843	61.5748	59.5125	54.4429	60.6473	68.722	64.6524	57.6215	50.9665	68.8352	70.3982	69.5297	72.3207	46.0981	64.2736	47.0181	74.4187	70.6051	69.9576
	208	63.406	1.84764			70.9197	53.0555	73.4724	71.9386	56.4902	61.959	60.2952	53.2445	60.4395	69.9217	64.7431	57.2562	51.5879	67.4933	74.1694	68.122	71.3322	46.2245	64.1119	47.1299	75.3499	69.7733	69.3075
	210	63.1776	1.8234			70.1728	51.616	72.0884	71.5703	55.8083	62.0423	60.7534	54.1453	60.3896	66.8299	64.2572	57.3307	51.8631	68.037	73.8725	71.3024	71.1917	46.745	63.7088	46.465	74.8285	68.7394	69.3277
	212	63.4796	1.81102			72.3246	52.9725	71.8858	72.1247	56.1249	62.4029	61.3586	55.3351	59.5178	65.3686	63.3835	57.2733	52.4301	67.1824	76.71	72.0544	70.7973	46.6944	65.211	47.6054	74.2807	68.4501	68.5433
	214	63.9318	1.87061			73.2867	51.0588	73.1709	72.0183	57.9333	64.6573	62.0234	56.2488	59.858	63.9258	61.6167	58.7011	53.2879	66.7647	77.6682	74.2217	71.4191	46.9711	65.8955	47.0129	74.5438	67.8708	70.2776
	216	64.0037	1.82558			72.2449	51.1352	72.558	71.592	57.539	65.832	60.8987	57.132	60.3834	67.0763	60.5754	59.2452	52.9094	67.7195	75.8625	73.5925	71.531	47.4821	65.9263	47.1037	74.2536	68.377	71.115
	218	63.9451	1.90554			73.8527	49.7591	72.3451	71.3108	56.0322	64.8069	61.0734	56.272	59.5536	67.9266	62.5998	59.379	51.7403	66.8933	76.3106	73.5707	71.1005	47.4514	65.9057	46.9195	74.6924	70.4749	70.7661
	220	64.1096	1.89515			75.3187	50.7434	71.49	70.4702	56.1939	66.1676	61.1917	55.2867	62.1223	67.408	62.3546	58.3977	51.367	66.7946	76.4337	72.9515	70.8833	47.4309	66.5499	47.6876	74.627	70.9722	71.6776
	222	63.6798	1.89943			75.8287	50.2991	69.7266	71.9266	55.905	65.1624	58.6864	54.2292	60.7196	64.6917	62.2844	57.7728	51.5346	68.2016	76.4985	73.3631	69.6636	48.3696	68.5986	47.3347	73.6488	70.9715	69.2189
	224	63.5795	1.94362			76.1205	49.1251	70.6869	72.387	56.7543	65.5515	58.8694	53.5297	61.3179	64.0688	60.4632	56.8373	51.4859	67.9323	76.8277	73.412	70.2996	48.9003	66.5343	46.8356	73.9573	69.9748	70.4566
	226	63.5057	2.00575			76.524	48.8968	70.3916	71.8263	55.9989	65.3127	57.8965	52.9558	60.8397	65.7121	59.1907	55.7349	51.5044	68.6296	77.5643	72.8937	71.8829	48.9771	66.5045	46.588	74.1972	68.9836	71.6244
	228	63.7551	1.96286			77.289	49.0005	70.2947	71.6509	55.8642	65.9984	57.8079	53.0391	61.4755	67.6981	58.6251	56.2921	53.9274	69.3776	77.4739	73.5266	70.7742	49.8604	67.3159	46.6252	73.3324	68.1697	70.9484
	230	63.9341	1.9384			76.958	48.6106	68.626	72.2477	56.2521	64.5808	57.7302	54.2505	61.6904	69.1071	59.7492	56.8785	54.8269	68.1937	76.9037	72.9234	72.263	50.1289	67.1484	46.4523	73.4544	69.1376	72.3712
	232	64.1309	1.97431			76.5137	47.5691	68.4927	74.3342	55.3523	66.0854	58.1725	55.2023	61.5045	69.5303	59.6158	56.9112	55.37	67.152	76.1207	72.7774	72.5248	50.8044	69.6964	45.6261	73.4272	69.2307	72.998
	234	64.6122	1.98977			77.1606	47.782	68.4136	74.8213	55.5836	65.3116	58.321	56.3933	60.696	71.7483	60.1855	57.8657	56.4514	67.5636	77.6381	74.1109	72.078	51.1789	70.7648	46.2591	73.5288	68.5277	73.6964
	236	64.932	1.99005			76.6017	46.7398	67.9969	75.4941	55.563	66.8188	58.6756	56.3839	61.4309	72.64	62.3238	58.734	56.0678	68.2387	79.1981	74.1138	72.1575	52.055	70.4215	46.9068	73.0307	68.9701	72.8744
	238	65.0388	2.04153			76.9025	47.0758	67.546	75.3758	55.4198	68.176	59.0984	55.8842	61.0809	73.2126	60.6616	58.7375	55.2824	69.9102	79.19	74.2164	72.4635	51.8478	70.3164	46.7301	72.2764	69.2663	75.2231
	240	65.0213	2.07419			76.4642	46.1792	67.4243	75.5815	57.0327	66.9163	59.0138	56.2096	62.1192	72.4904	61.9369	58.7786	53.5481	69.3725	78.7618	73.5173	73.5636	50.4385	71.1693	46.4399	74.1459	69.5982	74.7883
	242	64.8328	2.0895			78.1711	45.7494	69.0998	75.8111	57.5198	66.6276	58.7709	57.5187	61.7884	70.568	60.73	57.6185	53.2109	67.5238	78.5351	72.8109	73.0998	50.9425	71.5387	45.6081	73.2904	69.3539	75.2673
	244	64.5171	2.09706			79.1424	44.8063	69.6398	75.8075	56.8366	66.1877	58.5949	58.27	61.19	70.769	59.5721	55.8664	55.1401	66.8795	77.1151	72.8245	74.0226	50.5376	71.1254	45.0631	72.9542	69.1701	72.378
	246	64.3917	2.0215			78.6197	45.6782	68.0558	76.17	56.5093	66.9329	59.5821	58.0139	62.2661	70.1402	59.8334	56.5845	55.042	65.7739	76.2201	72.2207	71.5632	50.9197	72.4681	44.9222	72.7139	69.312	71.4677
	248	64.4356	2.06242			79.2194	45.8549	68.5961	76.1663	55.7368	66.8524	59.4816	57.3595	61.8313	69.0071	59.3855	58.1379	56.0601	66.7952	76.1817	71.8581	72.8655	50.1317	71.0939	43.8831	73.8494	69.6302	72.04
	250	64.2692	2.05831			79.3874	44.4341	67.616	77.27	56.4002	66.4956	59.6457	57.0074	60.5085	66.5413	60.2275	57.2645	56.047	67.0527	75.4073	72.0726	72.4954	51.6127	70.9858	44.1985	73.1638	69.5755	72.7817
	252	64.4099	2.10552			80.403	44.4742	66.6427	76.9428	55.7449	65.7389	61.3251	56.3125	60.9347	68.3173	59.546	57.4289	56.731	66.6648	76.2071	73.4491	72.5007	51.531	69.404	43.6537	72.9746	70.26	74.2418
	254	64.4789	2.06891			79.3346	44.1828	65.3862	77.9569	56.2709	66.6744	61.763	54.9628	61.4982	68.2235	60.7479	58.7439	55.7276	68.5891	75.7061	72.9308	72.0899	52.2817	69.1376	44.3993	72.9437	69.333	74.1312
	256	64.4014	2.08384			80.0994	43.9163	66.7374	78.0815	56.7198	65.7205	62.1224	53.1917	61.7221	68.3744	59.8738	58.7906	55.9241	68.9731	74.2886	72.5862	73.5589	52.2624	70.335	44.4954	72.6831	67.9802	72.7955
	258	64.3526	2.11447			79.4616	43.9773	66.9425	77.6802	57.2123	66.7703	62.035	52.3801	61.2751	67.9734	58.1155	58.19	55.0539	67.4497	73.5148	73.4423	71.7006	52.3469	70.5059	44.9842	75.205	68.5787	75.3143
	260	64.1737	2.02959			76.343	44.6149	66.8842	78.5895	57.1548	66.4349	62.8242	54.3624	59.8932	68.686	61.1116	57.6873	53.9027	67.2875	71.7521	72.558	71.8933	52.4524	69.8823	44.4964	73.643	67.8232	75.7177
	262	64.0855	1.99457			76.1142	45.1459	66.2027	76.6921	57.2109	67.9424	63.0682	54.601	60.2005	69.9597	60.7101	57.3764	53.9378	66.1788	70.4273	71.8735	71.8905	52.4484	71.3415	43.8638	73.2405	68.6885	74.8531
	264	64.4949	1.9776			76.3371	44.9793	65.8963	76.7298	57.3036	69.2674	63.4658	56.3695	61.5666	69.7439	60.1962	58.4194	54.4811	66.9874	70.5797	71.7653	71.5964	53.7073	70.4922	43.9031	74.4418	69.3882	75.7653
	266	64.3723	2.01346			77.192	43.5148	64.4838	76.4621	56.8926	69.125	64.2505	55.0288	60.7511	70.4797	59.7039	59.4739	54.6185	65.7423	70.2032	71.954	72.6831	54.6215	70.1286	44.0181	74.5261	69.7926	74.9166
	268	64.7526	2.04474			76.6423	44.7883	65.141	76.6135	56.8769	70.1533	64.597	55.1207	59.5812	71.7096	59.4323	59.2117	54.9152	66.3327	74.7167	72.5164	72.4484	53.6888	70.3612	44.849	74.707	68.5239	76.3829
	270	64.9118	2.08263			77.9465	45.7434	63.7987	76.3774	55.6608	70.2317	64.5925	55.2586	58.4455	72.2434	59.7167	59.8642	55.6075	68.538	75.6355	74.621	71.0045	53.9862	68.0699	44.3135	75.5109	69.0481	76.7561
	272	64.8876	2.15641			78.213	44.3119	63.3882	78.5479	54.9423	68.7867	65.0512	54.7962	57.5941	71.1418	59.7429	59.3096	55.5867	69.3295	76.2073	73.8677	72.0503	53.9826	69.5507	44.5671	76.1313	68.7722	76.5449
	274	64.6808	2.12159			79.2152	45.8061	62.7194	79.162	55.7218	68.6519	65.4574	54.9681	58.8881	69.4049	58.2913	58.7709	55.1819	68.8597	73.4563	71.2073	71.5426	53.8063	70.4155	43.6026	76.2042	69.4568	76.868
	276	64.4981	2.12963			78.4742	46.24	62.8658	79.502	54.8272	69.2478	66.093	54.7689	58.0364	66.9496	57.8602	58.5898	54.2713	69.7111	73.5925	71.1064	71.3741	54.4139	71.1763	43.0062	74.93	69.7328	76.686
	278	64.1599	2.13465			77.7386	45.5549	61.9987	79.2736	54.4982	72.6409	66.5333	55.4534	57.7017	65.6344	57.1285	58.3614	53.0014	69.9808	69.7947	69.7044	72.0101	54.357	70.9198	42.8953	74.6365	69.1641	76.6954
	280	64.297	2.11836			78.2412	46.2064	62.2749	80.075	54.5286	72.205	67.0011	55.684	58.8116	65.3684	56.4752	58.5337	54.1065	68.9457	68.3818	69.9909	72.1228	53.8673	71.3317	43.5787	75.1952	68.5424	77.3625
	282	64.7339	2.13421			79.572	47.0007	62.6073	81.4493	53.9191	73.4265	67.3551	55.8813	58.86	66.5504	56.2568	58.4031	56.2338	69.7696	68.2035	69.8179	71.5687	54.4411	71.5871	44.1734	75.6524	68.4663	77.6835
	284	64.7714	2.07237			79.1393	46.1672	62.0155	79.6393	54.1931	71.3994	67.7653	56.782	60.3214	67.5113	58.4684	59.3262	56.9647	68.7792	68.0458	70.1583	72.4567	54.7788	70.4817	43.1573	75.0199	69.664	77.5074
	286	64.7762	2.04896			78.1099	47.6306	60.4021	78.7198	54.0571	71.5365	68.6027	57.0638	58.8893	70.3794	57.1307	58.6283	57.6091	69.0587	68.805	70.2641	73.8158	55.7719	70.3324	42.7278	74.4593	69.8143	76.0448
	288	64.4737	2.05489			76.8909	47.6615	58.7449	79.3308	54.4451	73.1784	68.9478	56.9536	57.5773	69.8483	56.0517	58.5591	56.6752	70.9764	69.8856	69.19	73.5351	56.0816	68.5075	42.4755	74.7437	69.826	72.8082
	290	64.5416	2.08799			78.9407	48.6917	57.4771	79.8875	54.1199	72.3216	68.2877	57.1385	59.4658	69.6552	55.5045	58.7086	55.8768	70.5698	68.0787	71.0357	75.4211	57.0198	68.0729	41.7761	72.9849	69.4128	74.0104
	292	64.329	2.09539			78.1618	48.2665	55.9264	80.6076	53.6454	72.3331	68.4377	56.9792	59.1751	68.4289	55.9741	57.8447	56.0924	69.5531	67.2231	70.6057	74.3702	58.2391	71.2716	41.3349	73.1833	68.9056	73.008
	294	64.2569	2.07714			78.8102	48.6042	55.7482	81.2556	53.8544	71.2719	69.3247	56.0145	60.6501	66.4667	55.8741	57.0639	56.4246	69.0062	65.1802	69.9307	74.3019	59.498	71.166	41.7977	73.1215	69.7874	72.7549
	296	64.2961	2.0914			77.6231	48.3803	54.8328	81.8345	53.5018	71.7618	70.1045	58.4353	60.5674	67.4516	54.2824	55.3473	56.8777	67.7767	68.4008	68.2229	74.6167	59.9069	71.0417	42.1403	73.2777	70.0606	72.3655
	298	64.2378	2.09613			77.3101	46.8805	53.0852	81.9598	54.2936	71.6711	70.7362	58.919	60.8158	66.3149	54.799	56.3862	56.9239	67.3895	67.7596	67.9008	73.9921	60.6828	72.1137	42.2708	72.8368	69.1712	73.256
	LifeAct + NDEL1 shRNA + NDEL1 332/336A resi
	Time	Mean	SEM	N
	-18	100.371	0.20007	33		100.911	100.861	100.1	101.165	99.9285	100.718	101.347	99.9081	101.405	100.377	100.476	100.414	100.445	100.448	99.883	102.141	99.5313	98.6653	101.872	99.5009	99.8471	102.493	98.7816	100.022	101.733	99.1296	100.996	96.3554	100.356	99.8688	101.087	100.956	100.521
	-16	100.418	0.127306			100.428	100.363	98.9181	99.4382	100.508	100.438	100.323	99.8976	100.088	99.5933	99.934	100.003	100.515	100.211	99.6779	102.431	101.388	99.8874	100.604	100.399	101.264	101.868	100.815	100.395	101.057	99.4976	101.838	100.213	100.073	100.188	100.565	100.41	100.562
	-14	100.048	0.126414			100.096	99.9329	99.738	99.6957	100.753	99.6063	99.7227	99.5412	99.5297	98.9857	100.308	100.818	99.7611	100.043	100.855	101.143	100.096	99.5091	99.4915	99.5649	98.0254	101.658	100.684	99.656	99.7384	100.06	101.002	101.337	99.9458	100.348	100.508	100.105	99.3158
	-12	99.63	0.154827			99.6751	99.1915	100.962	100.448	99.5083	99.32	98.9419	99.935	99.0565	100.851	100.013	99.7874	97.2681	99.6408	99.847	98.2106	100.32	100.252	99.5892	100.425	99.1929	97.7062	101.07	99.6475	99.1501	99.8245	98.9639	101.554	99.3763	99.8035	99.6894	99.5616	99.0077
	-10	99.5334	0.240193			98.8893	99.6519	100.282	99.2526	99.3018	99.9184	99.6656	100.718	99.9215	100.192	99.2689	98.9786	102.01	99.6566	99.7376	96.0744	98.6639	101.686	98.4437	100.111	101.671	96.2748	98.6492	100.28	98.3225	101.489	97.2002	100.54	100.249	99.7921	98.1514	98.9672	100.593
	0	0	0			0	0	0	0	0	0	0	0	0	0	0	0	0	0	0	0	0	0	0	0	0	0	0	0	0	0	0	0	0	0	0	0	0
	2	8.31034	0.307224			8.76991	7.20917	9.01849	6.92529	5.9626	6.44988	7.48405	6.58851	7.12329	6.02501	9.14527	7.63078	9.57159	10.5561	10.6565	6.41716	7.49218	8.12742	5.96541	9.71966	10.024	7.93372	9.27053	6.12306	7.68577	11.2589	9.99302	9.86664	9.23246	6.97175	7.92963	13.3411	7.77239
	4	12.6664	0.525891			13.1549	10.2165	14.0043	10.4804	8.17085	10.3458	10.978	9.25059	10.6089	9.01685	13.8653	11.4861	14.5449	16.1907	16.6286	8.75785	11.9507	13.4626	9.22129	16.2777	14.7648	11.8079	14.8546	8.78738	12.0838	17.558	15.2646	15.1491	14.4339	9.74531	11.0532	20.9909	12.8844
	6	15.9116	0.712744			17.2416	13.1129	17.8544	12.953	9.4088	12.4713	14.0265	11.3011	12.7752	11.8429	17.0676	14.0095	17.1743	19.865	21.281	9.80495	14.8992	16.2527	12.7736	21.1661	16.9844	14.3275	18.1266	10.9224	15.5185	23.5124	20.1112	19.7626	17.6285	11.8414	14.164	27.4588	17.443
	8	18.7957	0.860026			19.0325	15.8116	20.385	14.6559	11.9161	14.5314	17.354	13.2612	14.5187	13.2202	20.386	17.4672	20.116	22.7331	25.6163	11.6101	18.255	19.8371	15.3133	25.6166	17.6934	16.6402	21.7185	12.5938	18.5102	27.8799	23.7991	22.9873	21.0186	14.0962	17.4352	33.4266	20.8207
	10	21.2179	0.960455			21.6667	18.331	23.019	16.3914	12.8428	15.6815	17.6738	15.31	17.3545	14.6845	22.4255	19.6872	23.2937	26.6513	28.9028	13.6273	20.8551	22.7988	17.1442	29.2159	21.7872	18.1733	24.2027	14.0566	21.0822	30.2954	26.5482	26.4484	24.5202	16.2484	18.6093	36.6243	24.0369
	12	23.5424	1.05003			23.8382	19.6797	26.3007	19.3	13.8824	17.3939	20.6583	16.9076	19.05	16.0689	26.4024	21.7533	25.818	30.3329	32.1226	16.8581	22.199	25.8115	18.1719	29.792	24.3799	20.0804	25.9325	15.3445	24.8915	32.8141	29.4104	29.5828	27.0947	17.0891	20.3475	40.4793	27.1123
	14	25.7497	1.12112			25.4904	21.2019	28.4154	21.185	15.2047	19.4215	23.3716	18.7438	20.7955	17.2995	28.9675	22.9976	28.9391	32.3309	35.548	18.0698	25.2158	26.9523	19.7203	31.7886	26.3085	21.179	28.4138	16.7349	27.1029	35.7553	32.5492	33.0778	29.5529	19.466	25.4061	42.9369	29.5976
	16	27.466	1.14745			26.5762	23.4683	30.8513	22.997	16.9126	20.0342	25.5088	19.8145	22.1005	18.8308	31.2995	24.7635	31.4572	33.9541	37.4427	19.0993	27.4336	28.9812	20.5633	33.9548	29.3686	21.9137	30.6676	18.0328	29.7263	34.9148	34.3048	33.9696	32.3474	21.2468	27.049	44.848	31.9453
	18	29.2296	1.19332			27.6565	24.7204	33.3212	24.9287	17.4883	21.1753	27.9637	21.5526	24.0458	20.0526	33.1091	26.9489	32.4559	34.971	39.7845	19.4227	29.1448	31.2362	21.0685	36.4131	31.2647	23.9646	33.435	19.8655	32.1862	36.1843	38.0829	36.2068	33.5784	22.5287	29.7992	45.4839	34.5355
	20	30.6837	1.28968			28.0555	26.1511	34.5648	24.9617	18.7364	22.1054	30.1031	22.3061	24.4688	21.2341	34.7473	28.0717	35.5407	37.174	41.5434	19.0324	30.5253	33.4398	21.7173	40.3649	32.0364	25.2937	35.1988	21.0225	34.3168	37.0556	39.4665	38.343	34.919	23.0083	31.8785	47.382	37.7978
	22	31.885	1.31776			28.6949	27.6335	36.9219	26.8062	18.8721	23.8278	31.8633	23.4566	25.0677	22.5478	36.5307	28.4517	36.9907	39.9415	42.2942	20.0135	31.6776	34.9988	21.9361	42.2362	33.8209	26.2545	36.3336	21.1947	35.1373	37.7057	40.6875	39.289	36.4772	25.1712	32.8004	48.4163	38.1546
	24	33.2363	1.37372			30.5146	28.1446	39.0089	28.4712	20.557	24.0095	33.5268	24.0852	25.5263	23.6547	37.9115	28.8341	37.4246	40.8904	44.4463	21.1976	33.7273	36.4117	22.7715	43.004	33.7324	26.6596	39.3173	22.5656	37.0763	40.6011	41.9166	41.9301	38.1528	25.9104	34.2451	49.5123	41.0605
	26	34.4504	1.37369			31.411	30.1904	40.0624	28.4788	21.3866	25.8982	35.4239	25.258	26.6287	24.1621	39.984	29.1688	37.4524	42.1681	45.871	23.2928	35.949	37.6993	25.151	45.0697	35.5862	28.0298	39.6384	22.9923	37.784	41.4676	42.0105	43.8912	39.594	27.1913	34.6752	50.0908	43.204
	28	35.6192	1.37758			31.9889	30.9355	41.5119	29.4876	22.411	26.642	38.4245	26.2166	27.5688	25.3328	41.0126	31.1545	38.8808	43.6761	46.5757	24.885	36.4398	38.8215	26.8272	47.432	35.416	29.0017	40.9977	23.8636	38.7385	42.2153	42.578	45.8731	41.3757	28.3158	36.6942	50.1814	43.9589
	30	36.8074	1.40013			31.7703	32.2038	43.1675	30.4963	22.635	28.2001	39.4276	27.5197	28.2419	26.516	40.7591	31.7918	40.748	45.3925	47.3029	26.8872	37.7413	40.0385	28.414	47.7824	37.958	29.6838	42.2504	24.2926	42.0399	44.8808	43.233	48.0002	41.8504	29.5532	37.0942	50.7805	45.9907
	32	37.9667	1.43345			32.9913	33.7387	43.7774	30.5166	23.9441	28.8871	40.8991	28.3675	28.9082	27.6631	41.1833	33.1676	42.9352	48.6167	48.9796	26.407	38.0682	41.2227	30.9385	49.1397	38.6862	29.7157	44.3513	26.0221	42.7809	46.3368	44.0651	48.9848	43.0982	31.8521	36.8609	51.5044	48.2922
	34	39.0324	1.47901			33.3827	35.5087	46.1496	32.4616	24.9614	29.7422	42.5868	29.1931	29.0519	28.4615	43.4197	34.2169	44.0215	48.8526	49.9123	26.216	40.2403	42.4449	31.4229	51.0117	37.5363	29.8692	45.2966	26.5422	44.3665	47.041	46.7081	50.4602	43.8268	33.5673	37.6196	51.8541	50.1224
	36	39.9543	1.56084			32.6215	36.6704	47.1896	32.4437	25.2545	30.4359	43.9062	29.5726	29.4888	29.7519	43.7732	34.5348	45.3488	49.0901	51.3588	25.8483	41.0547	43.253	32.2715	51.7704	41.635	31.1264	46.8624	26.8223	45.3218	48.9721	48.2914	51.2719	43.2522	34.4272	36.7612	54.9011	53.208
	38	40.8249	1.59544			33.8739	37.9341	48.0799	32.4795	25.6002	30.778	45.4017	29.9908	30.4587	29.8615	44.029	35.2062	47.2469	48.4689	51.3762	25.5608	42.9254	43.9467	31.3327	52.9001	43.3784	32.7637	47.5244	27.2391	48.1941	49.7135	48.9601	51.7767	46.0274	36.1819	38.1836	55.7612	54.0657
	40	41.4496	1.57607			33.8276	38.4401	49.4359	33.3802	27.5009	31.1727	47.0354	30.9633	30.8412	31.7035	45.6788	35.0649	48.6369	48.8733	51.9841	26.5908	43.4594	43.9488	31.6082	52.5768	43.0331	32.5092	47.3502	27.9617	49.2332	50.4746	49.9671	52.8453	46.6641	37.1307	38.8317	56.8087	52.304
	42	42.074	1.54862			33.9026	39.2174	49.8087	33.2988	28.0459	32.4176	49.0359	32.3962	31.7754	30.9865	45.475	35.4166	48.0639	48.8848	52.5785	27.5486	43.9887	43.5542	32.1039	53.7367	44.804	33.4082	48.3841	30.4841	49.6338	49.7127	50.7037	54.8074	47.9845	38.5859	39.9779	57.0795	50.6397
	44	42.4638	1.5537			34.1957	39.5354	50.8702	33.5498	28.4298	33.348	50.5708	32.9559	31.7277	31.7813	46.0957	35.889	47.949	50.1969	53.1861	27.5371	44.1892	43.6603	31.6879	52.8484	45.0494	33.6118	49.9971	30.4405	49.9892	52.129	50.5857	55.5666	48.5476	39.6908	40.2228	55.226	50.0445
	46	42.9876	1.57763			34.5115	39.1106	51.7735	33.7751	27.7215	33.2304	50.0955	33.3667	31.8291	32.0779	46.1381	36.6465	47.8973	50.4556	54.2031	28.057	43.7403	44.3236	33.5166	52.6913	47.0433	33.5315	51.7286	31.1988	50.8903	52.4207	51.8524	55.6165	49.0379	40.6503	42.4235	57.0253	50.0114
	48	43.6253	1.55307			34.7655	39.917	52.5578	34.0582	28.0819	34.2282	49.4016	33.5783	33.4017	33.2946	46.2533	37.7319	48.8219	50.2669	54.803	27.5182	45.0478	45.8022	34.466	51.764	48.1579	35.4374	52.8964	32.7128	51.065	51.9384	53.0094	56.6947	49.3646	40.3951	44.3944	57.2809	50.5288
	50	44.3979	1.58331			35.9384	40.4595	54.2612	35.453	28.4301	34.97	50.0131	33.3056	34.3728	34.2621	47.0374	37.8022	50.8426	50.1021	55.3414	26.7273	45.8219	45.8887	37.0559	50.94	49.7695	35.3829	53.7419	32.6852	50.4543	52.949	53.7106	58.3633	51.2756	42.0173	44.9627	56.4672	54.3263
	52	44.8293	1.58944			36.7518	42.3097	54.4356	35.5753	28.3279	35.7305	51.1496	34.5606	35.3683	35.1547	46.5518	39.0173	51.6789	49.8681	54.7841	26.1635	45.7671	48.4398	37.3023	51.9214	49.7891	34.9486	53.6388	32.9118	50.0423	53.3862	54.2521	59.4363	51.0701	40.9946	45.7233	57.0876	55.2284
	54	45.4577	1.62674			37.0178	42.8947	53.7022	33.8953	28.2725	36.118	53.0144	35.0873	35.5682	36.023	48.4494	40.1025	51.9932	50.7486	53.9941	26.7058	45.8979	49.5088	38.914	51.8792	51.6835	35.5143	53.4318	33.7717	52.2535	53.8532	55.6579	61.3506	51.0859	41.7482	44.9415	57.6946	57.3302
	56	45.9026	1.60222			37.972	43.8875	54.033	34.0818	28.5132	37.046	53.713	35.4013	35.8479	36.9555	49.8365	40.6975	51.057	51.7409	54.1372	28.3193	47.1679	49.1644	38.8502	51.7174	50.4748	36.893	54.1904	33.9319	53.644	53.8123	55.343	61.4094	52.7926	41.1877	44.9929	57.7769	58.1972
	58	46.5556	1.62822			38.6562	44.5421	54.8523	35.2149	29.9513	37.0652	54.4735	35.2934	35.5716	38.1079	50.9289	41.0903	53.3312	51.5829	54.7983	30.1503	47.713	50.2426	37.3308	54.999	52.0306	36.9081	55.1395	33.916	55.4617	54.1793	55.1274	62.2156	53.4492	41.9415	43.7684	57.248	59.0545
	60	46.7863	1.62523			38.8523	44.0901	55.3747	35.4121	31.0552	36.6727	55.7	36.5811	34.7105	38.0861	51.4583	40.8433	53.858	52.34	54.4824	30.5372	49.4673	49.3231	37.4853	54.9423	52.6745	37.282	55.3363	35.0901	55.779	53.7634	55.1754	62.8713	53.7056	42.2443	42.7993	56.4471	59.5091
	62	46.855	1.61113			39.8466	43.9396	54.6893	34.7796	32.0777	37.1664	55.6553	35.9142	34.9828	37.6999	52.0035	41.1545	54.5865	52.987	55.4444	31.5549	49.4083	49.699	36.9394	55.5277	52.6362	36.9541	55.4718	34.9884	55.3466	53.3475	54.9825	63.057	53.5118	43.2247	42.0022	57.7689	56.8681
	64	47.2432	1.62632			39.2046	43.8821	55.6783	35.115	32.1964	37.2425	55.8043	36.2181	34.9713	37.9978	52.6058	41.7634	55.0546	53.7823	56.5829	31.5628	48.1695	48.7578	37.9554	56.7116	53.9141	37.9246	55.7328	35.8697	55.2604	54.1634	53.6715	63.4258	54.9522	43.4194	43.5059	58.5813	57.3474
	66	47.7567	1.67057			39.7426	44.2143	55.2552	33.6597	32.9302	37.5166	56.4794	37.2567	35.056	39.945	52.6925	42.6881	56.9198	55.3868	57.2269	29.9611	49.1903	50.5568	36.1128	57.5379	55.4219	38.4401	56.1172	36.0069	55.7195	53.0236	55.2487	64.4138	54.4137	44.5039	46.4598	57.6468	58.226
	68	47.992	1.6516			40.4511	45.5045	56.2494	34.8195	33.2809	37.3444	57.014	38.4583	35.0479	40.8374	53.7788	41.8153	57.7174	55.8623	59.2167	28.8584	50.632	50.0787	38.4631	58.8305	53.9548	37.8106	55.4138	36.945	55.2881	51.3184	56.5169	63.0264	53.5304	44.7371	45.5374	57.487	57.908
	70	48.0947	1.6754			40.9025	45.9395	56.786	34.8604	33.1122	37.2925	57.3932	38.7469	35.0769	42.0138	54.0777	41.9231	56.7986	56.8689	58.7452	27.9393	51.3838	51.5239	37.2261	58.316	53.5353	37.9824	55.8029	36.8358	56.2444	52.9044	57.7994	63.5472	53.0164	45.2507	43.6785	56.4926	57.1098
	72	48.2271	1.70443			39.4747	46.6692	56.065	33.1091	33.0052	37.9188	59.0246	39.8026	36.1557	42.5669	54.2143	43.3582	56.0338	57.9271	57.9593	26.851	51.6056	52.8508	36.717	57.7088	55.7005	38.3017	55.7122	36.8527	57.5311	52.9786	58.7808	62.9089	52.0344	45.3924	42.9475	55.0403	58.2965
	74	48.454	1.65819			40.5434	45.7931	56.0384	32.903	33.258	39.7289	60.4027	39.7422	35.9924	41.8748	53.5368	44.7208	53.9102	57.1761	57.9194	28.0935	49.7025	53.1057	39.4618	57.3374	54.7901	38.8108	58.3582	37.0037	55.3533	52.6689	60.1547	62.4681	53.5855	46.1768	43.8203	55.2918	59.2602
	76	48.8139	1.63613			40.1577	45.7777	56.6939	33.4349	32.097	39.3417	59.8918	40.6926	35.9693	42.0906	53.9215	45.4222	53.5597	56.7948	58.424	29.7636	50.3903	52.6186	41.8196	57.7003	53.5531	39.603	59.0219	37.2176	55.4983	54.3971	59.4048	62.2516	53.8291	48.1262	44.6934	55.7966	60.9043
	78	49.2762	1.6431			41.2425	46.1514	56.2792	32.6481	33.8214	39.9781	61.536	40.7517	35.6349	42.2505	55.0962	44.6852	55.226	56.1211	58.5265	31.3788	51.7133	53.4428	41.927	57.3175	54.7719	39.6485	59.5758	37.51	55.3749	55.3281	59.269	63.1448	54.1055	49.1484	44.4851	56.4599	61.5653
	80	49.8536	1.68976			41.2589	45.8444	57.575	33.5321	34.077	40.0203	61.445	40.2996	35.3692	43.1388	55.8098	44.6835	57.3865	55.7975	58.5185	33.0533	51.7719	53.7958	41.2091	58.1703	58.0398	39.8129	60.8425	37.9656	56.3579	55.931	59.9381	63.35	54.0693	49.8507	44.3945	58.4363	63.4244
	82	49.8958	1.69954			42.1555	45.7418	57.7023	33.1323	33.7809	39.5269	61.2227	40.6041	35.3367	43.959	56.3049	44.215	57.3645	57.1455	57.5932	32.0479	52.0172	54.7751	41.6308	57.1837	58.024	39.6529	59.2726	37.7789	56.6661	55.8684	60.9271	64.7616	53.9948	50.7667	44.7979	59.1515	61.4576
	84	50.4489	1.68768			41.6206	45.4599	58.2868	33.2226	35.4447	39.8259	59.9446	41.0152	36.1658	45.127	55.7769	46.1928	58.4207	57.0362	59.2378	31.8545	52.1312	54.024	44.4519	58.0534	60.1985	39.4622	60.2639	38.4015	58.4395	56.138	60.8836	65.4363	55.9647	51.7955	45.4377	58.6887	60.4114
	86	50.699	1.69978			42.2902	45.1252	58.971	33.6637	34.8166	40.6736	60.2745	41.9998	36.6289	45.655	57.1668	45.5743	59.9694	56.5689	59.4408	31.6697	52.2809	54.1272	45.1186	58.0843	62.0692	38.8055	60.5389	39.0224	59.0984	53.5198	60.751	64.8896	57.8627	51.562	45.7335	58.645	60.4693
	88	50.8131	1.71393			42.1688	45.1119	58.3253	32.2307	34.6241	40.0116	60.3748	42.6479	37.516	45.4284	57.4266	45.6341	59.8953	57.0597	59.582	32.8555	51.8541	54.7661	45.1513	58.1743	62.5195	38.6077	61.4477	40.2916	56.9429	54.7124	62.5401	65.3937	57.2363	52.6468	44.3753	58.7762	60.5021
	90	50.7483	1.70944			42.5951	45.2153	58.0112	31.569	35.4547	40.6219	60.3063	42.8261	37.0712	45.6476	58.5648	45.2881	59.3635	56.6339	59.989	34.3781	51.7981	55.3755	44.1719	58.5881	61.6739	37.481	61.8472	39.1615	56.285	56.0046	61.629	65.7441	57.9364	52.6141	43.6655	57.739	59.4421
	92	50.845	1.65031			41.8032	45.5743	59.2579	32.4796	36.0991	40.8253	60.0305	43.0015	37.2567	46.5672	58.0765	46.3106	58.6238	56.7992	58.8663	35.986	51.512	55.8668	45.1568	58.5123	61.6157	37.539	62.0331	40.0799	56.5396	55.3654	60.3501	66.005	58.4517	51.3518	43.7522	57.7662	58.4311
	94	50.9237	1.67457			42.5341	45.805	59.5872	32.4937	36.4144	41.2493	61.0999	42.6922	36.7982	46.9674	57.3933	47.3872	58.1256	56.8228	59.3865	34.602	53.6533	55.6573	46.0881	58.7644	63.8762	37.5309	59.9938	39.6283	53.9855	54.9698	60.0289	66.1211	59.5586	51.5119	42.3667	58.572	58.8178
	96	51.1176	1.65423			43.4126	45.8214	60.8095	33.4858	39.605	41.1918	61.8877	42.567	36.4943	47.2563	57.4737	48.0746	58.0273	55.905	60.3063	34.1339	53.5781	54.7467	45.4567	60.522	64.1009	36.6998	58.0705	39.8332	54.0225	53.2178	60.6265	65.9872	59.0128	50.9086	44.8464	59.0357	59.7649
	98	51.0782	1.60313			42.6083	46.929	60.3625	32.6394	39.6979	41.3797	62.7544	42.7444	36.6855	46.9269	57.8355	48.588	58.6343	54.8431	60.4415	34.2209	52.8705	54.744	46.1695	59.5055	59.9811	39.2822	57.6598	39.5531	54.9413	54.3183	60.8216	64.7035	59.989	52.951	44.2205	56.9099	59.6703
	100	51.3898	1.67727			42.9535	48.0837	60.2072	32.1767	40.2405	40.7686	62.4786	42.8838	36.9096	47.4255	58.0813	48.8791	59.686	54.1201	60.6912	31.2891	53.507	54.4481	47.3622	59.6029	60.9905	39.003	57.53	40.6711	57.2163	54.6668	61.5442	66.8768	60.8703	52.0125	44.0723	56.7083	61.9063
	102	51.7332	1.71024			42.6755	48.3985	60.0964	32.7573	40.8596	41.4937	63.5655	43.2977	37.1107	48.6548	57.1179	48.9891	59.7765	55.047	60.8453	31.7453	52.9751	55.1563	47.1416	58.7537	62.8366	37.6341	57.7192	39.5628	60.0959	54.7429	61.1204	68.1595	61.0535	52.1136	45.2683	57.5737	62.8572
	104	52.0132	1.75484			42.8994	47.9321	60.8445	33.2884	40.6281	40.7285	64.3806	43.6225	37.45	49.4053	57.9461	49.4843	59.4811	56.087	62.3719	31.1259	53.8068	55.8617	47.003	56.8733	63.1775	36.2151	60.2424	40.9286	61.7506	55.7081	62.0441	68.3634	60.0692	51.863	44.4863	58.8053	61.5608
	106	52.1995	1.76073			40.8321	47.7252	60.6255	32.7235	40.8344	41.3936	65.5005	43.7503	37.2353	49.7334	58.1848	49.3441	58.968	54.809	62.3427	32.0838	55.2356	56.6213	46.5346	58.7976	65.0396	36.8206	61.4803	41.4412	61.7295	54.3033	62.0921	67.2769	59.3501	52.6599	46.5044	59.1739	61.4378
	108	52.0799	1.69545			41.5368	46.7921	60.5631	32.5418	41.2086	41.6307	63.1927	44.0451	37.3754	49.7739	57.4521	48.8272	58.5849	55.0624	62.7744	33.0023	55.2315	56.6693	48.5023	56.8465	63.7357	36.8145	61.2134	41.4235	61.899	53.9631	60.5455	67.1964	59.5286	52.6811	47.9359	58.556	61.5296
	110	52.167	1.65116			42.7549	47.3528	61.2791	33.3924	41.0699	41.9984	63.2044	44.7013	37.3561	51.1154	57.3689	48.5847	57.327	56.1792	62.7864	33.346	54.9696	56.0114	49.0432	57.7044	67.1142	37.5704	59.0085	41.9984	60.5218	53.134	59.8996	65.7036	60.4948	52.6624	47.7771	56.7295	61.3503
	112	52.2548	1.67323			43.5173	47.9487	61.4655	33.193	41.4756	42.0825	60.3852	45.1027	37.9265	51.7844	59.5063	48.7293	59.0233	56.7839	62.4765	32.8224	53.73	55.8854	49.572	58.3229	67.3026	37.137	58.8679	41.1854	59.4345	52.8331	60.2561	67.9518	61.8716	52.6771	46.5156	55.5444	61.0964
	114	52.3074	1.67045			43.7642	47.9568	62.1814	33.9727	41.9565	42.5086	60.5917	45.2758	37.6497	52.4041	59.5913	49.3161	59.9834	58.2313	62.8368	31.6475	52.5477	56.8839	49.6845	59.1254	66.6809	36.4343	58.4767	42.7387	57.8188	53.7903	59.5794	67.9303	62.4879	55.0694	44.7376	55.3744	56.9165
	116	52.1096	1.63643			43.9965	46.936	62.2162	33.8028	43.9168	42.7691	59.5062	46.272	38.0066	52.2389	59.7898	49.3925	60.4332	56.8945	63.065	30.4904	52.9563	56.8895	49.2255	59.519	62.2995	36.1288	57.0546	43.2241	57.6862	53.4597	59.6254	68.4233	62.0478	55.126	44.0939	55.1708	56.9606
	118	52.3701	1.71062			43.1602	47.5188	62.1465	33.3326	44.0799	42.7861	60.2042	46.3605	37.7322	53.0656	60.1341	49.2885	61.0085	57.1584	63.5861	28.5645	54.3647	56.8085	46.9698	58.5311	63.5261	36.5188	58.2209	44.3031	58.0211	54.3145	62.6106	68.9141	62.4524	55.3459	44.2191	56.1798	56.7871
	120	52.2358	1.7047			41.4817	47.2987	62.3749	33.5352	44.6334	42.6822	57.8574	46.9061	36.5092	53.3137	60.0431	49.1811	60.8199	57.2153	64.1509	30.4006	56.3958	56.2758	45.6865	58.6442	65.4458	36.2342	58.876	45.2991	57.0274	53.441	62.1643	67.2356	62.3874	55.7852	42.3771	55.4096	56.6915
	122	52.2879	1.69249			41.9179	46.4406	62.0587	32.8976	44.1968	42.9241	59.4296	46.7231	36.4288	52.1873	60.034	49.2699	60.6855	57.7327	64.3879	30.2658	55.5125	57.4921	47.8688	58.2391	62.7657	35.8977	59.0718	44.6677	57.2925	54.0069	62.0534	66.8827	61.1777	56.5662	44.4333	54.786	59.2079
	124	52.4096	1.68543			41.9031	46.6558	61.4242	32.1458	44.0673	43.2956	60.3194	47.1281	37.4327	52.085	60.3484	51.2081	59.935	58.369	64.8397	30.6373	55.709	57.5934	49.1966	56.1148	61.3449	35.0073	58.7501	45.4268	57.2542	54.4414	61.9287	66.7151	60.9896	56.9464	43.7732	55.262	61.2673
	126	52.6131	1.6765			41.5114	46.1774	61.8917	32.8134	44.5819	42.9676	60.6233	47.5767	38.7398	51.5926	60.2956	51.0298	60.6647	59.5017	64.2504	31.9376	56.1171	57.1141	51.2184	57.4235	57.3246	34.7841	59.2548	46.3429	56.2641	54.6042	61.9479	67.6721	62.7966	56.2988	42.4057	55.6519	62.8564
	128	52.5754	1.66146			40.8303	46.0617	61.9469	32.7535	43.6418	43.5527	60.3401	48.1476	38.4746	52.0546	60.0874	50.6142	61.8392	59.9004	63.2457	34.0539	54.006	57.7402	50.8961	56.1481	57.6845	35.0448	58.453	45.4838	54.8669	54.1347	63.4819	68.5625	61.8237	57.1776	43.4999	55.0428	63.3965
	130	52.489	1.65025			39.5386	46.3492	61.2876	32.1536	44.5393	44.5264	59.0645	48.361	38.6888	53.391	59.8094	50.0177	61.4162	60.746	63.4798	35.1059	52.9278	58.0595	50.3325	55.8525	59.0759	34.1293	58.143	46.9923	55.4796	55.6199	63.373	68.7888	62.0733	57.1425	41.9786	54.0078	59.686
	132	52.5905	1.67405			40.1958	45.275	61.2043	32.1032	45.223	43.3431	58.2543	48.2856	39.038	53.6802	60.5861	50.3654	61.8895	61.3526	63.9614	35.5144	53.8055	58.19	49.2077	56.0204	63.5205	34.087	56.7181	46.9113	54.4033	52.8426	61.3779	70.3222	62.6542	57.0421	43.4614	54.2757	60.3742
	134	52.6781	1.74674			39.7984	45.3166	61.1518	31.9404	44.3315	42.771	57.408	48.739	38.6709	53.7613	60.1202	50.7016	61.1215	60.9254	64.465	34.0754	56.198	58.9882	47.634	57.0735	67.6511	33.3733	56.7411	46.9863	55.4749	52.1126	61.4226	70.2346	62.9812	57.0523	43.781	54.2878	61.0881
	136	52.6863	1.73138			39.0223	45.1021	61.0402	31.9106	46.206	42.3923	56.7654	49.6778	38.2389	54.2292	60.4307	52.3461	59.6409	60.4754	63.5138	33.3171	55.0293	58.0791	45.9484	56.8346	68.0027	35.1179	57.928	46.8931	57.2775	52.0581	62.108	68.6399	63.8187	57.3576	42.9629	56.1914	60.0915
	138	52.9131	1.75992			38.9837	45.2435	61.7187	32.2498	46.2843	43.1181	57.5824	49.5438	38.5465	54.0138	61.8695	52.3967	57.9531	61.8535	63.1114	32.8784	53.4079	57.1677	47.843	58.2647	68.3178	34.8584	57.7794	47.2655	57.9858	51.4388	65.6066	69.9913	62.853	58.2253	43.1203	55.4114	59.2483
	140	53.1608	1.78092			38.1603	46.6941	60.7201	31.3989	45.6213	43.7195	55.7471	49.3028	39.2517	54.144	61.5122	52.0367	58.788	63.1112	62.9365	33.6582	54.5824	56.4623	49.0624	58.1813	69.4832	35.6362	58.2719	47.7582	60.9529	50.7776	65.525	70.9341	63.3645	58.6413	42.5	56.1914	59.18
	142	53.4312	1.7622			39.3086	46.917	60.9656	31.5202	46.2714	43.2994	55.7673	49.8137	39.5554	54.3362	61.9583	51.5919	58.2174	61.5621	63.8909	34.4587	53.4648	58.7694	50.2844	58.1557	68.5045	36.1533	59.751	46.7486	61.6162	52.2503	63.0517	71.5	63.3273	59.2734	42.8624	54.8568	63.2255
	144	53.1934	1.71287			39.02	45.9984	60.8645	31.4992	46.3545	42.5968	56.0497	50.35	39.6727	54.1787	62.1907	51.3543	57.9228	60.8094	64.0026	36.1061	53.57	58.6807	49.7922	56.9238	68.9336	36.8522	59.8257	47.5924	62.5987	53.5032	60.4848	71.4804	62.2318	58.2505	42.7814	52.9544	59.9571
	146	53.0535	1.69698			38.4403	46.2691	59.6053	31.063	46.3432	43.1339	56.9823	50.3601	39.3537	54.7293	61.7031	51.6931	58.6061	60.1705	64.2007	36.5138	54.8297	59.8424	49.4576	55.9347	67.6466	37.3002	60.2795	46.4797	61.6	55.6553	59.1823	71.5468	61.673	56.8669	42.3212	51.0175	59.9656
	148	53.1316	1.7127			38.7088	46.7778	60.4967	31.868	47.6392	43.7695	57.3219	50.752	39.2596	54.2817	62.4828	50.8739	60.1081	60.2114	63.0235	36.3749	53.4258	60.1671	47.9036	56.1657	68.9683	36.2107	60.6414	46.3492	61.6198	56.1426	58.7466	71.5935	62.288	57.3612	41.9814	51.2717	58.5552
	150	53.1609	1.70291			39.2124	45.8826	61.4354	32.8094	48.2016	42.9752	56.7079	50.8832	38.99	54.4814	62.8481	50.7869	60.4472	60.0458	62.5254	35.918	52.9273	59.7394	48.2302	57.0628	67.5616	36.2844	60.9586	45.2533	60.5316	56.4688	57.7027	70.7557	64.3999	58.5688	42.4321	52.3517	58.929
	152	53.1065	1.75179			39.1783	45.8441	60.6378	31.8923	48.3318	43.2146	55.3267	50.8405	38.6796	54.2845	63.4571	51.1697	60.2888	60.0729	63.0585	35.1562	53.9092	60.3061	48.0092	57.0485	67.785	36.0935	61.1136	43.8804	59.9374	56.0019	60.076	71.5337	65.5904	57.9821	41.8829	52.6394	57.2928
	154	53.269	1.75879			38.6982	44.7618	60.5106	31.7805	49.563	42.9208	55.123	50.9105	38.6696	54.8394	62.855	51.4905	60.9877	59.7613	62.1713	34.8944	53.4872	59.8333	49.0364	58.72	72.2144	37.6273	60.5537	45.4008	59.7195	54.3043	60.3136	70.9	65.4773	58.0475	42.6143	53.1492	56.5407
	156	53.0451	1.72007			39.2296	44.1298	61.2203	32.6226	49.1957	42.8049	55.9419	50.9291	38.2704	55.2314	63.0855	52.0675	59.7483	60.7836	61.5442	33.9938	53.6769	60.0579	51.5261	58.6653	68.1795	37.347	60.198	44.0127	58.895	53.2403	59.3944	69.7854	65.5787	58.1399	41.8539	51.9991	57.1396
	158	53.2335	1.79149			39.3341	44.7945	59.8414	30.776	49.3599	43.5622	58.4487	51.0757	38.1094	54.7498	64.3197	51.4376	58.5526	61.9911	61.1238	33.5258	52.7033	59.916	51.9552	56.7895	71.3198	35.8651	61.0423	46.7593	56.072	52.7782	62.7654	69.4197	65.8113	58.0042	41.0665	53.6958	59.7394
	160	52.8549	1.82031			38.361	43.823	59.0446	29.947	49.9803	44.0077	59.0668	50.4022	37.9335	54.6213	65.2909	52.2344	57.5906	61.4587	61.4028	32.5388	52.9291	60.256	51.5441	55.5937	69.382	34.2181	61.3325	47.0331	55.2124	53.5293	58.9226	71.3116	66.6155	57.5753	40.7378	53.2385	57.0765
	162	52.8033	1.81063			38.7276	43.6649	60.1752	31.0146	49.3905	42.4965	57.31	49.7537	38.2663	55.3513	64.8784	51.9306	58.2802	60.9327	60.8424	32.0532	51.7549	60.2802	51.6577	55.2291	68.6683	33.357	61.7756	46.9424	55.9013	53.6317	58.3318	70.3906	66.3431	58.0873	41.684	53.2594	60.146
	164	52.8059	1.82534			37.9263	43.3223	60.4282	30.9355	48.4103	41.9216	58.4612	49.5681	39.3702	55.0186	65.2137	52.5286	58.6774	59.7302	60.9022	32.1783	51.4746	60.4246	51.0941	54.2821	70.2977	35.3653	62.1897	47.2918	58.6479	52.3043	58.1656	70.4877	65.4833	58.6994	39.7164	52.8314	59.2456
	166	52.8782	1.85618			39.0304	43.8863	60.8498	31.4196	48.6079	41.9341	58.3292	49.4702	39.1796	55.0906	64.3523	52.5203	60.6382	59.3347	60.6625	31.3252	50.262	60.4239	49.8735	56.2867	71.2957	35.6018	60.7699	46.9298	61.5007	52.442	58.7047	71.9432	65.9066	58.1578	38.9947	51.2515	58.0062
	168	52.6971	1.85616			36.803	43.8448	60.3766	31.1896	49.5273	42.6218	58.9214	49.9822	39.0436	53.5644	62.3133	52.3296	59.0046	59.3906	60.9966	31.065	50.8943	60.4249	50.6828	56.9747	68.7619	34.0037	61.6018	47.066	62.4012	51.363	57.6446	71.2323	66.6859	59.2892	38.5421	53.4005	57.061
	170	52.7032	1.7849			37.4149	43.9182	59.7231	30.5448	50.7474	42.9709	57.603	49.272	39.3905	54.5413	63.3774	52.4848	58.8163	60.4094	61.0875	32.0228	51.315	60.4943	51.8858	56.3481	68.6669	36.058	59.6052	47.1181	62.5477	48.2058	56.4727	69.2203	66.3634	60.4307	41.1329	52.1359	56.8816
	172	52.427	1.7879			37.9522	44.0153	60.5093	31.4712	50.6934	42.8134	56.4141	49.0611	38.4233	53.3111	62.1797	52.2857	57.4727	62.6823	61.6849	32.1313	51.3734	60.5174	52.087	54.4512	69.724	35.4561	61.0349	46.0181	61.7801	48.9273	55.7069	68.2259	67.1989	59.944	40.6154	52.0758	51.8549
	174	52.4289	1.77752			37.8012	44.8622	60.1647	31.0861	51.7734	42.0881	56.9187	49.4562	38.2882	52.9718	62.8558	52.0291	56.2244	61.8648	62.4685	31.801	52.8556	60.0729	52.218	53.9027	65.3351	35.1118	60.9859	46.0752	61.7065	50.0754	56.8667	69.6835	66.7195	60.5171	39.9997	53.2013	52.172
	176	52.6067	1.80688			38.4472	44.7579	59.8113	30.7728	52.5335	41.8342	58.6139	49.2068	37.8319	53.5007	62.7653	52.2246	55.7008	61.3159	62.8532	32.2585	53.1536	59.8623	52.1035	53.3455	69.4174	35.8409	60.7387	46.6562	60.727	51.4691	56.937	69.5173	67.3725	60.4529	38.7032	53.766	51.5306
	178	52.6339	1.81086			38.1953	44.1951	60.3464	31.3089	52.5709	41.6225	60.5556	49.0032	37.3597	52.773	63.359	52.4574	57.6952	60.5959	63.1853	32.7566	52.2181	60.2645	52.1437	54.3175	66.4148	35.2973	60.7119	46.5232	58.2589	52.9843	60.5528	69.0016	67.1734	60.6494	37.4658	54.0966	50.8638
	180	52.6798	1.80425			39.2367	42.9085	60.5164	31.329	52.5225	41.127	61.5799	49.4493	37.2572	53.3979	63.5186	53.1232	58.2857	60.87	62.0959	33.2051	52.151	60.2605	50.6919	53.0917	67.6964	35.2503	58.7317	47.5744	59.1192	52.5014	60.9672	68.2224	67.0878	61.0012	38.3408	54.9538	50.368
	182	52.6714	1.79819			38.5256	44.459	59.2431	30.2417	51.5711	42.1352	62.0642	49.3066	37.6808	54.0536	63.1886	53.2452	58.5132	60.2149	62.0068	33.7807	51.4557	60.6126	49.1396	53.2441	67.8246	34.6414	58.6403	48.0416	60.9235	51.6681	60.3281	67.1099	66.0857	60.8164	37.6477	57.0366	52.7112
	184	52.6584	1.79311			37.8198	45.0057	59.2519	29.7676	51.5153	42.4088	60.6533	48.977	37.5118	54.3013	62.984	53.1246	59.1612	60.857	62.2306	33.0771	51.0375	60.4508	50.4998	55.2249	65.5784	33.6665	59.3825	49.6293	58.9149	52.0967	57.883	66.4373	66.516	62.3856	38.0714	58.0166	53.2893
	186	52.6722	1.78329			37.802	45.0151	59.0229	29.5389	52.1676	42.6183	61.8706	48.5909	37.0078	53.8571	63.7667	52.8065	59.0198	62.169	61.9344	34.6223	52.373	60.5014	50.4818	54.3505	62.2751	33.6834	61.2017	47.9335	58.4679	50.7112	58.132	66.1193	66.3187	62.7461	38.4562	58.189	54.4336
	188	52.5611	1.79943			37.2379	44.7752	59.3373	30.0113	52.4217	41.1286	62.0458	48.157	37.6028	53.8854	62.3147	54.1087	57.6386	62.5121	62.2753	34.4948	51.4552	59.7048	51.0172	53.1716	66.0262	32.8436	61.6573	47.156	58.7095	51.9455	57.8079	66.047	66.2091	61.026	38.6177	57.2446	53.9298
	190	52.4798	1.80608			37.7389	44.4396	58.1264	29.6628	52.5026	40.3741	62.7013	47.4651	38.1381	54.2386	64.0299	54.2833	59.2529	62.3259	62.3397	34.7576	49.7072	58.4534	51.2295	52.6023	62.9862	32.4184	62.499	46.3892	57.0588	54.0461	57.6032	64.811	67.2656	62.3877	38.4064	56.3425	55.2492
	192	52.495	1.86816			37.4131	44.4701	59.0301	30.4095	52.1667	39.8043	64.3355	47.3672	37.8194	54.2325	64.941	53.3331	59.9848	62.4948	62.271	34.0191	48.5598	56.909	52.1263	54.1529	62.1053	32.8121	63.4584	44.6314	55.1906	55.0745	58.7052	68.6338	67.7279	62.4127	37.7945	55.5496	52.4007
	194	52.5837	1.91296			37.761	44.7953	57.5847	29.1766	54.1379	39.5493	63.9089	46.6205	37.1825	54.262	65.1898	53.8719	60.6354	62.7257	62.6164	34.4591	47.4183	55.3023	50.7049	54.5494	68.0604	32.1491	62.3203	46.7964	54.9368	53.6617	57.7175	69.6726	68.0734	63.2757	39.5436	53.6343	52.9695
	196	52.7346	1.92609			39.506	44.1306	57.911	29.6169	54.1764	39.3987	65.0448	46.098	37.2203	54.0283	64.031	53.9969	61.4546	61.5116	62.7423	33.8006	48.3839	55.9222	51.6745	53.5905	68.3325	32.4234	62.4946	46.0071	54.4886	55.2851	59.5704	70.5583	68.0446	63.252	38.5555	53.5477	53.4441
	198	52.9152	1.95221			39.6171	44.4482	57.1183	28.8448	52.8377	39.2805	66.7692	46.921	37.2749	55.0393	63.5453	54.0882	61.6786	62.3218	62.5062	32.8481	49.449	57.4716	52.0857	53.8423	68.2889	32.7474	62.5813	45.9508	56.7626	54.4794	60.5223	71.4448	66.7716	61.901	38.0853	56.2371	52.4429
	200	53.1574	1.97216			40.6668	45.308	57.3989	29.3807	51.8088	38.9751	67.2615	46.0241	36.887	55.9849	64.1189	55.1608	61.0017	62.5893	63.0881	33.3137	50.3796	57.6004	50.0423	52.7417	66.9898	31.5993	61.9018	45.886	59.526	53.3234	64.1919	71.3222	68.7361	61.3725	39.8922	56.6909	53.0299
	202	53.1598	1.94673			40.5878	44.6982	58.1919	30.0183	53.4655	38.7059	68.3248	45.5874	38.2333	55.767	64.5256	55.7954	59.2827	63.1818	62.6778	34.1942	50.2897	58.1225	48.1559	52.7718	65.9471	32.7093	62.2384	45.9969	59.2538	53.7941	63.7483	70.6272	69.8173	61.3199	40.8937	57.0295	48.3195
	204	53.0067	1.96293			40.6169	43.4118	56.4937	29.0423	53.1833	38.838	68.9596	45.2918	38.1752	56.3623	64.4692	56.2893	57.5664	64.4152	61.9111	34.393	50.6645	57.762	46.5764	52.9507	67.7061	32.6992	63.3584	47.1428	53.8764	54.9902	62.5026	70.0948	69.9023	61.8652	41.0365	57.7068	48.9669
	206	52.8171	1.94268			41.4212	43.4704	56.939	29.2131	52.6317	38.9596	68.8716	45.7477	37.4966	56.1052	63.1121	55.582	56.212	65.9819	62.9788	35.1614	50.1919	57.0838	46.801	53.7734	67.0618	32.2949	63.1487	47.0601	53.4366	53.0754	61.7114	69.6486	69.911	61.219	40.7661	57.3139	48.5824
	208	52.6731	1.96368			41.0282	42.5209	56.3381	28.7804	52.1834	39.5837	68.2886	44.5712	38.2031	56.184	62.4109	55.7931	56.3896	66.5428	63.7423	35.1714	49.8527	56.6702	47.5425	55.3331	68.2391	32.2522	62.1091	45.1684	51.8018	54.2816	60.0035	70.7981	69.0564	61.2145	39.711	58.1766	48.269
	210	52.5774	1.97613			42.2734	42.9217	54.8721	27.168	52.2101	38.5805	67.2879	45.0275	38.234	56.4605	64.0301	55.9994	57.7531	67.1489	63.5753	35.1655	49.7217	57.1054	49.1537	55.925	66.8051	32.7685	62.612	44.1296	49.0535	52.9098	57.7894	70.5474	69.5084	61.0117	38.5429	58.5485	50.2132
	212	52.6254	1.96621			43.4108	41.5493	55.0798	27.4877	55.1047	38.5335	64.5269	45.398	38.611	56.126	64.9129	54.7261	59.825	67.0739	63.4144	35.0918	50.3387	57.8599	48.434	56.0714	64.8978	31.9072	64.0104	44.9063	49.5497	52.5623	55.5331	71.1357	69.3792	62.7851	38.8353	57.055	50.5056
	214	52.4783	1.93243			43.5242	41.1825	55.0808	27.5573	53.7342	37.651	64.4286	46.2726	38.4192	56.6352	64.9935	54.2347	60.1017	66.1936	63.8841	34.7205	50.5588	58.6685	46.8552	54.5005	61.9945	31.9944	61.0583	45.3743	52.9819	52.043	56.5286	70.526	68.648	63.4421	39.3395	57.7265	50.9314
	216	52.6458	1.96348			43.7558	41.9576	53.2557	25.4337	53.9709	38.2743	64.6759	46.341	38.2508	56.3309	64.8614	55.2968	59.2747	66.0853	64.438	35.3458	51.005	57.9785	46.9792	53.8864	62.0672	32.6647	63.6538	46.2627	54.8955	52.8878	56.6944	69.7627	69.9048	63.7106	37.8095	58.3628	51.2366
	218	52.5079	1.94546			45.0772	41.4385	52.5348	25.0532	54.2388	38.7232	65.2701	45.6812	37.7445	56.5166	64.9098	55.0403	59.2251	66.5512	63.0558	36.9926	50.3615	56.9933	46.1411	51.6857	59.5845	31.9579	63.598	46.1319	55.0912	50.6377	57.3676	69.2463	70.4008	64.0834	39.5503	58.4601	53.4156
	220	52.7113	2.01695			44.7418	40.9699	52.4417	25.0142	53.9314	38.2031	66.3327	45.6512	37.6546	56.7603	65.2826	55.5694	59.0682	67.8939	62.2036	36.9759	50.2623	56.9509	46.1542	52.9873	62.8311	31.177	63.0401	45.3685	55.6478	48.7402	61.3445	69.419	70.6	65.8246	39.6669	58.0065	52.7589
	222	52.4332	2.05311			43.4753	40.6865	52.2366	24.6995	53.5572	38.331	67.0225	45.7239	37.5093	56.9374	65.1916	55.0911	58.1015	69.2579	63.322	36.6524	50.0499	57.3847	46.7114	52.5634	63.3607	30.425	62.3516	44.1836	55.0021	44.3788	60.6395	67.6734	69.6398	66.9735	39.3501	57.1779	54.6348
	224	52.3678	2.04608			43.2282	40.9743	52.7695	25.1473	53.9562	38.0939	67.4445	45.4181	36.7467	57.2504	65.0705	57.0922	58.5043	68.8517	62.5757	35.0721	50.2134	57.5802	48.0161	53.6353	64.2294	30.4047	60.9643	42.6581	52.8937	48.5257	57.5128	67.3532	70.3314	65.8687	38.7579	56.1342	54.8642
	226	52.305	2.01763			42.8644	39.8959	53.079	25.7194	53.5202	38.5552	66.6765	44.935	36.563	56.716	64.7626	57.7692	57.7369	67.9969	63.7259	32.9329	52.742	56.8066	49.583	57.0505	61.6689	31.0477	59.4445	44.5324	51.4974	49.9999	56.2948	66.8624	70.4825	65.689	38.1776	55.1547	55.5835
	228	52.3694	2.02636			43.4745	40.3166	52.8532	25.6291	53.5615	38.8021	66.2417	45.5872	36.1577	56.8719	64.2732	57.9744	57.2211	66.8435	63.4048	32.883	52.0879	56.7822	49.982	55.8387	66.1754	30.6831	58.8053	45.2735	49.8517	50.8218	57.1466	66.9837	69.3388	67.2537	37.7015	55.5623	55.8058
	230	52.3903	2.02541			43.4361	40.078	53.4361	26.233	53.9697	38.356	65.0033	44.9669	36.8835	57.0175	63.9386	56.382	59.4935	66.4639	63.2649	33.053	52.4703	55.8465	50.4714	57.2807	64.7548	30.0462	59.6346	43.6337	49.0242	53.8836	57.2571	68.7862	69.5205	67.5556	38.6842	55.7379	52.3163
	232	52.7577	2.03442			43.6493	39.4261	53.5313	26.3269	55.0073	37.7763	65.5512	44.6521	36.6015	57.3868	63.3751	56.6918	59.4258	65.1698	63.1992	34.703	53.4116	56.4057	50.7798	55.3058	67.5951	30.9188	60.8624	45.344	52.4607	51.7836	57.8695	69.4058	71.9185	66.9455	39.3244	56.2231	51.9748
	234	53.1016	2.08577			44.3121	40.3702	52.9838	26.3849	54.2698	37.3531	63.1721	44.7236	36.268	57.0313	64.2934	56.9485	61.0926	66.6273	62.1364	35.7651	52.6676	56.4647	50.6436	54.5497	73.4479	32.6362	63.6003	45.4207	54.0125	53.4991	55.9595	69.9545	72.7197	67.2453	37.4504	55.7687	52.5791
	236	52.6782	2.09499			43.5882	38.3278	53.6092	27.2558	53.4299	36.9412	62.1169	44.5019	35.7651	56.686	64.1506	56.2918	61.4635	66.6947	62.6441	35.1677	51.6516	56.7505	49.2674	53.9451	71.3063	31.7962	60.1422	45.9969	53.7798	55.3459	54.762	67.5307	73.8298	68.438	35.0979	56.6102	53.4968
	238	52.8211	2.1408			44.7266	37.5383	53.5061	27.1446	54.6443	36.7174	62.5372	44.4401	36.1768	56.6455	64.2151	56.2585	61.8954	66.7352	63.1416	33.8781	51.2136	56.9767	48.4706	55.1204	70.9476	31.8222	61.2588	44.7347	54.4619	54.7714	56.7463	67.7168	74.4164	68.5497	34.2275	57.8047	53.6556
	240	52.8013	2.15766			43.6799	37.2161	53.6833	27.3384	53.8221	36.2242	62.0663	45.0774	35.9481	56.1797	64.5631	56.2563	62.0908	68.6682	63.6663	32.8731	52.3425	56.9659	48.411	54.8228	70.1523	31.7324	61.7788	44.9656	55.5597	54.5237	56.7522	67.4529	74.5064	69.0214	35.3997	56.6028	52.0986
	242	52.6434	2.13375			44.7848	37.9198	54.0585	27.7006	53.1455	35.6806	62.049	43.9568	37.0141	55.875	64.3773	56.3082	62.1936	69.165	63.7112	31.4314	50.5861	55.9996	47.4107	53.2148	68.2079	33.0588	62.2695	46.0131	55.0169	53.9017	58.1017	68.8413	74.334	67.8273	35.4424	55.5683	52.0663
	244	52.5968	2.11314			45.4897	36.2469	53.6931	27.4155	52.5315	35.6908	61.8767	43.8233	36.5794	55.8348	65.4717	55.9832	61.7972	69.1502	63.9664	31.5697	49.6738	54.9729	50.4627	52.8149	65.604	33.679	62.6778	44.7771	53.9076	54.8968	59.1918	69.4953	73.0687	67.9185	37.4143	55.743	52.2751
	246	52.5756	2.15183			45.7133	35.6108	53.342	26.979	52.7507	35.4255	62.1259	43.5526	36.2137	55.6371	63.892	56.5164	61.6971	71.229	63.849	32.4092	49.7334	55.4918	50.5673	51.4708	70.4392	33.5704	60.3003	43.196	52.6916	54.7709	58.6244	68.906	72.7784	68.0261	37.5433	56.4565	53.4859
	248	52.4138	2.13478			45.5769	35.5431	52.9827	26.4156	52.6846	34.7838	61.5519	44.132	36.0754	55.1755	63.8634	56.8838	61.4243	71.6008	62.9589	34.3673	49.8918	55.9053	50.9862	51.8646	69.3226	33.485	60.0707	40.9685	53.4291	54.2445	57.2021	68.3474	72.3723	68.3922	37.7532	57.4509	51.9492
	250	52.3313	2.11288			46.4294	36.2463	53.0468	26.2863	55.4708	34.6534	61.5163	43.622	35.7589	55.1662	64.139	56.9963	61.2776	72.1832	63.4747	34.7075	50.805	57.1716	51.759	50.2499	68.7837	34.4426	58.2826	39.9471	54.1394	52.2936	54.1067	67.7806	72.4706	66.6604	37.4528	56.6742	52.9371
	252	52.4433	2.07296			46.77	35.4358	53.253	26.4898	55.4939	36.1034	63.3678	42.3974	35.3841	54.8107	65.1025	57.428	60.1805	70.8127	62.7958	35.0014	52.4099	57.5588	51.8105	50.4427	64.4265	36.5706	59.3532	40.5575	53.2248	53.0594	53.2861	67.5091	73.9959	66.7916	37.815	57.5337	53.4556
	254	52.4505	2.05497			47.0639	35.577	54.0952	27.3837	55.3497	36.1575	65.7594	42.3855	35.117	54.4736	64.856	56.8682	59.0466	71.3555	62.4527	35.7575	50.5671	57.578	49.9922	50.7047	65.0996	36.9808	59.9716	40.6331	53.2394	54.6189	51.8284	67.4196	73.5094	66.436	38.7655	55.9219	53.9022
	256	52.7115	2.09669			47.0587	35.4566	53.1072	26.4901	55.0866	36.8683	66.3466	43.6388	34.2906	55.3508	64.3199	57.223	59.1739	72.6105	60.9126	36.6609	51.1144	55.7669	48.1862	53.1106	70.5201	36.4686	56.3364	42.3013	52.5045	54.4437	57.0213	68.2223	73.5108	67.4338	39.1556	54.4296	54.3581
	258	52.5282	2.06633			47.7821	35.802	52.9642	26.237	55.1845	35.9503	64.8921	42.1164	34.5542	54.8541	64.014	56.6671	60.5752	72.9829	60.7958	38.555	51.8368	53.9985	47.7459	53.6758	68.789	38.0081	56.6632	41.6909	50.8839	54.4578	57.7957	66.7252	73.8628	66.8992	38.1099	54.5572	53.8052
	260	52.3901	2.06091			45.9813	35.4657	53.2616	26.4018	54.7402	36.5458	60.8796	42.6914	34.5732	54.9826	63.6332	57.1581	60.5091	73.006	60.2651	39.1433	50.6734	54.5806	48.2901	54.6586	67.5314	38.5593	57.2677	40.3463	51.1418	52.3275	60.2846	66.1966	75.2155	67.204	37.0342	54.8558	53.4676
	262	52.3918	2.07153			45.4271	35.4998	53.2086	26.3518	55.6294	36.5769	63.3571	43.0577	34.4044	54.7453	62.9753	56.831	60.7072	72.472	60.6913	38.3207	50.421	54.5821	49.9793	53.847	68.0401	38.8411	56.1042	39.4852	52.5117	51.3661	60.4249	66.682	74.2164	67.6031	36.9182	55.3123	52.3383
	264	52.3231	2.09153			45.4998	36.0526	53.261	26.2645	55.1675	35.314	62.9266	42.6577	33.8082	54.2174	62.6204	57.5178	59.8119	72.0162	62.7402	37.7219	50.5416	55.6878	51.1364	52.6297	71.442	39.4329	53.9234	39.2807	52.2205	52.0343	56.2111	67.088	72.562	68.2923	36.7057	56.3871	53.4881
	266	52.4796	2.08657			45.5293	35.5792	52.1346	25.0801	54.8179	34.9565	63.1958	43.4747	33.8648	54.2258	63.0856	57.6168	61.411	70.9953	63.3175	36.7995	51.9104	55.7766	50.2771	51.4413	70.6871	40.1283	54.7835	43.1367	53.4837	52.9855	54.2489	66.5542	73.3267	68.3614	37.4115	55.9025	55.3276
	268	52.4742	2.1367			44.9642	34.9634	51.902	24.9222	54.894	34.4734	64.0541	43.6306	33.4448	53.0991	62.642	58.2029	61.1737	71.361	61.7528	35.0655	50.8232	54.7261	50.1248	50.0904	72.6836	41.4671	55.9703	42.8795	53.2597	55.5397	53.47	66.6236	74.1734	68.7768	38.0878	56.8248	55.5823
	270	52.3136	2.10939			45.489	34.8867	52.4658	25.4135	56.51	34.8239	63.2696	43.4069	32.9406	53.0926	61.9585	58.1391	60.4395	73.2643	60.6073	34.1349	50.6204	54.5153	48.5022	52.1966	69.3037	42.3846	56.4305	43.7191	52.2784	54.8919	51.8484	66.1198	74.8485	67.9508	37.641	56.5398	55.7144
	272	52.3951	2.10264			45.4587	33.909	53.5646	26.6903	56.0283	34.0872	63.2889	43.56	32.9475	53.751	61.9381	57.9384	58.7455	74.3911	60.6773	34.5583	50.3269	52.2299	47.2106	51.979	69.1499	43.3937	58.6195	44.0041	50.9239	55.4377	57.5951	66.0578	74.575	67.2387	38.2039	56.0357	54.5218
	274	52.2738	2.11232			44.5048	33.8761	52.5902	24.9713	55.4683	33.939	63.0862	42.9427	33.0119	53.649	61.9558	58.1625	57.2458	73.4504	59.7314	35.4142	49.3488	52.5186	48.8443	53.5898	70.1833	41.3563	61.0525	44.9369	49.4223	55.6055	58.5497	63.5984	73.7485	68.4423	38.8715	55.6347	55.3327
	276	52.0624	2.117			44.508	33.6605	52.2002	24.6432	56.237	32.1318	62.9119	43.0764	32.8494	53.6349	63.4169	57.8852	58.5022	72.8577	58.9016	35.3822	48.1433	53.4278	49.06	54.6751	67.6094	41.0099	57.9284	43.3126	50.3024	56.2539	60.3775	64.8399	73.6482	66.0495	38.125	56.1258	54.3717
	278	51.9634	2.11147			45.1172	33.0834	52.0628	25.1238	54.4098	32.1798	63.2145	42.2887	32.7729	53.3415	63.7275	57.9657	58.7182	71.8272	59.929	34.7448	49.9044	54.2033	49.2172	52.9247	66.3216	39.2345	56.1501	44.346	52.0093	53.8395	61.1023	63.7874	74.3398	66.8417	38.7718	57.9336	53.3568
	280	52.0319	2.18103			44.7304	32.6525	52.4794	25.3574	55.8152	33.0035	62.3663	42.1166	33.8079	53.2397	63.0725	58.2425	60.1297	71.7391	59.7181	33.828	51.6972	55.2719	48.0252	50.2482	72.8711	38.8661	56.9444	42.9231	47.9429	55.6297	61.6024	63.9694	73.5921	66.9871	36.9233	58.0547	53.2056
	282	51.735	2.13015			43.9821	32.5632	53.6551	25.9422	54.7969	32.7191	62.5207	43.1093	33.6423	53.1915	63.0701	58.5598	58.0638	71.8311	58.888	32.724	51.3938	56.3244	46.5459	49.9591	70.0533	38.5445	55.2441	42.6506	48.6963	56.2071	60.4256	63.067	72.6166	65.897	37.9132	59.007	53.4505
	284	51.5086	2.13037			43.4277	31.8156	53.9324	26.2904	53.7934	32.1884	63.4335	43.1989	33.332	53.6589	64.6891	58.2113	58.0969	72.1673	58.8672	32.4787	50.7262	57.5128	47.2623	51.6159	69.436	39.1093	53.908	42.0775	47.7747	55.1883	57.233	63.3111	70.9269	65.2547	36.5693	58.5398	53.7576
	286	51.4203	2.19774			43.5914	32.9699	53.7394	25.726	52.5746	32.2352	64.6689	42.3097	32.2666	53.9617	64.0473	58.3168	58.3295	74.7538	59.5464	34.1263	48.9675	56.1419	46.0717	51.566	72.2775	39.0378	54.7618	40.957	44.7724	53.6395	55.4463	62.6994	71.2767	66.1933	36.1689	58.4198	55.308
	288	51.133	2.22174			43.2454	33.2897	54.4623	26.313	53.9657	32.0166	65.6254	42.017	32.0342	53.1063	62.2338	57.6949	56.8447	75.6616	60.205	34.0366	49.2448	55.4982	46.7329	50.2909	73.6783	39.4066	56.5866	38.247	42.1642	51.9721	56.357	61.4599	71.5045	65.0104	35.3878	56.0988	54.997
	290	51.1055	2.29821			43.1007	32.9997	54.0169	25.6642	54.6398	31.9301	65.6837	41.4023	32.3994	52.8077	62.4262	57.4087	55.161	75.1683	60.2858	32.6853	48.1766	54.4448	45.6458	52.7405	75.4963	37.6604	57.9885	39.0037	39.8833	51.1123	60.1	63.2474	71.8201	65.9276	35.376	54.7473	55.3321
	292	51.3276	2.30656			43.2884	33.6392	54.263	25.6363	53.454	32.0054	66.2206	41.4203	31.6721	53.5169	62.2629	59.2504	56.6783	73.99	59.9194	33.3794	49.5906	51.908	48.3776	53.0437	76.1463	38.4692	56.8008	37.1589	39.6929	52.9117	60.6817	64.4993	71.9461	64.9784	34.6706	56.8142	55.5237
	294	51.6431	2.29871			43.0666	33.3524	54.5555	25.5999	53.0947	31.2542	66.3817	41.2921	31.3391	52.8373	63.6086	59.5228	54.9945	75.455	59.2548	34.6627	49.2101	54.4657	46.847	54.6099	74.8943	37.4385	56.8382	41.6613	41.8197	54.143	61.5482	65.3373	71.4238	64.9691	35.2163	58.3852	55.1435
	296	52.1467	2.31552			44.4933	33.536	54.2786	25.1701	52.8266	31.2911	68.2566	41.4741	31.5536	52.438	63.9548	58.9737	54.0342	76.8275	59.6467	35.9879	49.5401	54.8412	45.8734	54.6915	75.7224	38.8144	56.8117	43.1424	44.2825	55.9057	64.5413	65.4445	71.6484	65.2541	35.7844	58.8773	54.922
	298	51.9079	2.28971			44.9304	33.9594	54.8301	25.6506	52.9989	30.1014	68.0455	41.7468	31.1498	53.0539	63.1082	59.1685	54.4584	76.9403	59.4761	37.0221	49.2989	55.7442	45.6628	48.9255	74.2877	39.5305	56.6038	44.1972	44.632	54.4379	63.8689	64.5161	70.9723	65.6239	33.9905	59.6317	54.3957

## Sheet: Fig 6D-F LifeAct FRAP analysis
	Figure 6D-F. LifeAct FRAP F-actin dynamics assay associated with NDEL1 knockdown and rescue groups
		Scrambled shRNA				NDEL1 shRNA				NDEL1 shRNA + NDEL1 WT resi				NDEL1 shRNA + NDEL1 332/336A resi
	Number of values	27				22				23				33
		Area under curve	Percentage of mobile actin fraction	Half-max (t1/2) of recovery (s)		Area under curve	Percentage of mobile actin fraction	Half-max (t1/2) of recovery (s)		Area under curve	Percentage of mobile actin fraction	Half-max (t1/2) of recovery (s)		Area under curve	Percentage of mobile actin fraction	Half-max (t1/2) of recovery (s)
	Mean	8485	62.33	24.47		7371	53.09	19.5		8377	59.35	25.82		7218	51.42	16.3
	Std. Deviation	1447	11.57	15.35		1508	11.4	13.21		1045	9.58	21.67		1389	10.16	14.31
	Std. Error	278.6	2.226	2.954		321.5	2.43	2.817		218	1.998	4.519		241.7	1.769	2.49
	Lower 95% CI	7913	57.76	18.39		6702	48.04	13.64		7924	55.2	16.45		6726	47.82	11.23
	Upper 95% CI	9058	66.91	30.54		8040	58.14	25.35		8829	63.49	35.19		7711	55.03	21.37
		8166.96	63	46.25		6149.95	43	10.73		9585.96	68	17.04		5875.56	42	12.14
		8915.21	59	18.33		8479.04	59	12.61		7598.48	53	12.61		5936.99	57	14.17
		8072.29	59	39.21		6227.53	45	33.59		9835.89	70	16.92		8007.65	31	6.74
		6870.54	53	8.61		6387.7	46	35.19		8872.03	58	19.46		4359.73	55	65.56
		6964.6	52	29.08		7512.94	56	38.52		7390.93	54	26.12		6383.14	38	15.77
		9898.07	73	31		5313.94	36	30.13		7685.66	57	6.76		5440.02	62	20.92
		7029.85	55	8.96		8871.72	72	48.99		8351.51	56	5.67		8465.5	47	3.71
		9989.98	74	40.27		9068.13	59	6.79		7123.78	48	62.58		6138.03	35	14.13
		7237.52	54	26.37		7344.04	52	6.9		8337.13	58	18.49		5145.45	52	5.61
		6463.99	45	10.24		5954.53	44	28.8		8863.79	65	32.18		7007.5	60	27.01
		9592.62	82	51.83		8839.23	66	30.87		7635.65	57	6.96		8464.91	51	40.52
		10701.7	70	14.77		10412.7	78	28.83		7978.27	56	17.74		7172.48	57	17.93
		10746.8	81	34.93		7079.32	49	23.96		6812.33	42	82.54		8173.48	60	42.79
		8214.09	58	5.25		3954.32	29	23.8		9380.94	67	19.7		8795.35	57	5.44
		6496.47	45	13.99		8867.48	64	15.98		9570.81	64	35.17		8651.5	31	20.98
		6071.72	46	3.67		6280.91	48	3.67		9834.65	71	20.61		4665.91	53	8.69
		10248	85	53.22		7165.78	53	6.46		8599.04	74	55.39		7198.6	57	6.15
		7374.05	57	37.74		7935.75	57	5.86		6746.32	42	27.81		7830.03	48	3.85
		8064.29	56	19.07		6568.23	46	6.9		9127.27	61	5.62		6505.12	54	10.43
		8341.44	67	41.1		7810.9	57	8.49		6375.95	46	21.83		7860.12	66	31.42
		7969.71	56	22.77		6773.7	48	15.6		8623.69	78	69.52		8935.59	34	11.24
		10290.2	75	22.47		9166.03	61	6.23		9313.12	61	6.4		5101.81	56	4.91
		9582.3	63	8.1						9016.4	59	6.67		8277.5	43	27.93
		9808.57	68	8.94										5886.53	57	6.25
		10248	78	40.96										7726.09	55	3.01
		7134.21	53	18.77										7622.99	57	14.7
		8614.66	56	4.68										8298.69	66	11.17
														9361.24	66	41.23
														9040.35	58	6.07
														8005.52	41	8.97
														5818.61	55	7.15
														8119	58	5.15
														7932.98	38	16.22
