# Supplementary material for: Sequential phosphorylation of NDEL1 by the DYRK2-GSK3β complex is critical for neuronal morphogenesis
Source: eLife journal article supplement (doi:10.7554/elife.50850), 2019-12-09
Supplement: supp [file elife-50850-supp-v1.zip]

Figure 1-figure supplement 3. Table for the list of NDEL1 PTMs identified from mouse developing brain lysates.

| Domain                | Sequence                                             | Modifications                      | Rank            | XCorr              | ΔScore             | Charge          | Precursor m/z [Da]       | ΔM [ppm]           | Notes              |
|-----------------------|------------------------------------------------------|------------------------------------|-----------------|--------------------|--------------------|-----------------|--------------------------|--------------------|--------------------|
| 193-223               | [R].KSAPsPTLDcEKMDsAVQASLSLPATPVGK.[G]               | S6(Phospho); C11(CAM)              | 1               | 5.22               | 0.01               | 3               | 1084.86084               | 4.67               | S198; C203         |
|                       |                                                      | S5(Phospho); C11(CAM)              | 2               | 5.16               |                    |                 |                          |                    | S197; C203         |
|                       |                                                      | S2(Phospho); C11(CAM)              | 3               | 5.07               |                    |                 |                          |                    | S194; C203         |
| <b><u>194-223</u></b> | <b><u>[K].sAPSSPTLDcEKMDsAVQASLSLPATPVGK.[G]</u></b> | <b><u>C10(CAM)</u></b>             | <b><u>1</u></b> | <b><u>4.69</u></b> | <b><u>1</u></b>    | <b><u>3</u></b> | <b><u>1015.5069</u></b>  | <b><u>4.82</u></b> | <b><u>C203</u></b> |
| 194-223               | [K].sAPSSPTLDcEKMDsAVQASLSLPATPVGK.[G]               | S1(Phospho); C10(CAM)              | 1               | 4.33               | 0.02               | 2               | 1562.7428                | 6.56               | S194; C203         |
|                       |                                                      | S4(Phospho); C10(CAM)              | 2               | 4.26               |                    |                 |                          |                    | S197; C203         |
|                       |                                                      | S5(Phospho); C10(CAM)              | 3               | 4.24               |                    |                 |                          |                    | S198; C203         |
|                       |                                                      | T7(Phospho); C10(CAM)              | 4               | 4.22               |                    |                 |                          |                    | T200; C203         |
| 194-223               | [K].sAPsSPTLDcEKMDsAVQASLSLPATPVGK.[G]               | S1(Phospho); S4(Phospho); C10(CAM) | 1               | 3.14               | 0.03               | 2               | 1602.71619               | 0.3                | S194; S197; C203   |
|                       |                                                      | S4(Phospho); S5(Phospho); C10(CAM) | 2               | 3.05               |                    |                 |                          |                    | S197; S198; C203   |
| 284-305               | [R].KSYVPGSVNcGVMNSNGPecPR.[S]                       | C10(CAM); C20(CAM)                 | 1               | 1.99               | 1                  | 2               | 1205.04285               | 1.66               | C293; C303         |
| 285-305               | [K].SYVPGSVNcGVMNSNGPecPR.[S]                        | C9(CAM); C19(CAM)                  | 1               | 4.76               | 1                  | 2               | 1140.99597               | 2.29               | C293; C303         |
| <b><u>315-345</u></b> | <b><u>[K].GAVNGFDPAPPPGLGSSRPSSAPGMLPLSV.[-]</u></b> | <b><u>S18(Phospho)</u></b>         | <b><u>1</u></b> | <b><u>4.88</u></b> | <b><u>0.03</u></b> | <b><u>3</u></b> | <b><u>1003.82434</u></b> | <b><u>1.49</u></b> | <b><u>S332</u></b> |
|                       |                                                      | <b><u>S22(Phospho)</u></b>         | <b><u>2</u></b> | <b><u>4.72</u></b> |                    |                 |                          |                    | <b><u>S336</u></b> |
|                       |                                                      | <b><u>S21(Phospho)</u></b>         | <b><u>2</u></b> | <b><u>4.72</u></b> |                    |                 |                          |                    | <b><u>S335</u></b> |
| 315-345               | [K].GAVNGFDPAPPPGLGSSRPSSAPGMLPLsV.[-]               | S30(Phospho)                       | 1               | 4.96               | 0.32               | 3               | 1003.8313                | 8.43               | S344               |
