# Supplementary material for: Sequential phosphorylation of NDEL1 by the DYRK2-GSK3β complex is critical for neuronal morphogenesis
Source: eLife journal article supplement (doi:10.7554/elife.50850), 2019-12-09
Supplement: supp [file elife-50850-supp-v1.zip]

Figure 4-figure supplement 2. Table for the list of NDEL1 PTMs identified from HEK293 cells transfected with FLAG-hNDEL1 and GFP-hTARA.

| Domain<br>(residue w/o<br>FLAG-tag) | Sequence                                          | Modifications                                  | Rank     | XCorr       | ΔScore      | Charge   | Precursor<br>m/z [Da] | ΔM<br>[ppm] | Notes                  |
|-------------------------------------|---------------------------------------------------|------------------------------------------------|----------|-------------|-------------|----------|-----------------------|-------------|------------------------|
| 10-37 (1-25)                        | [K].LAAADGEDIPDFSSLKEEtAYWKELsLK.[Y]              | T19(Phospho);<br>S26(Phospho)                  | 1        | 1.81        | 0.02        | 5        | 658.10895             | 9.5         | T16;<br>S23            |
| <u>206-235</u><br><u>(194-223)</u>  | [K].SAPSSPTLDcEKMDsAVQASLSLPATPVGK.[G]            | <u>C10(CAM)</u>                                | <u>1</u> | <u>3.28</u> | <u>1</u>    | <u>4</u> | <u>761.88464</u>      | <u>8.3</u>  | <u>C203</u>            |
| 236-273<br>(224-261)                | [K].GTENTFPSPKAIPNGFGTsPLTPsARIsALNIVGDLLR.[K]    | S19(Phospho);<br>S24(Phospho);<br>S28(Phospho) | 1        | 1.4         | 0.28        | 4        | 1038.00183            | -0.09       | S242;<br>S347;<br>S251 |
| 275-290<br>(263-278)                | [K].VGALESKLAAcRNFAK.[D]                          | C11(CAM)                                       | 1        | 1.37        | 1           | 4        | 434.48862             | 0.4         | C273                   |
| 275-290<br>(263-278)                | [K].VGALESKLAAcRNFAK.[D]                          | S6(Phospho);<br>C11(CAM)                       | 1        | 1.17        | 1           | 4        | 454.47891             | -2.46       | S268;<br>C273          |
| <u>318-357</u><br><u>(306-345)</u>  | [R].SGHTSEFDKGAVNGFDPA PPPPGLGSSRPssAPGMLPLSV.[-] | <u>S31(Phospho)</u>                            | <u>1</u> | <u>3</u>    | <u>0.08</u> | <u>4</u> | <u>1004.73352</u>     | <u>1.85</u> | <u>S336</u>            |
|                                     |                                                   | <u>S30(Phospho)</u>                            | <u>1</u> | <u>3</u>    |             |          |                       |             | <u>S335</u>            |
